# Supplementary material for: Catalyst-Free Photoredox Addition–Cyclisations: Exploitation of Natural Synergy between Aryl Acetic Acids and Maleimide
Source: PubMed Central journal article supplement (PMC4506563; doi:10.1002/chem.201304929), 2014-03-20

# CHEMISTRY

## A **European** Journal

### Supporting Information

© Copyright Wiley-VCH Verlag GmbH & Co. KGaA, 69451 Weinheim, 2014

#### **Catalyst-Free Photoredox Addition–Cyclisations: Exploitation of Natural Synergy between Aryl Acetic Acids and Maleimide**

David W. Manley,<sup>\*[a]</sup> Andrew Mills,<sup>[b]</sup> Christopher O'Rourke,<sup>[b]</sup> Alexandra M. Z. Slawin,<sup>[a]</sup> and John C. Walton<sup>\*[a]</sup>

chem\_201304929\_sm\_miscellaneous\_information.pdf

## Table of Contents

|                                                                           |     |
|---------------------------------------------------------------------------|-----|
| <b>General Experimental Section</b>                                       | S3  |
| <b>Scheme S1.</b> Preparation of carboxylic acids                         | S3  |
| <b>Optimisation Studies</b>                                               | S9  |
| <b>Scheme S2.</b> Test reaction for optimisation studies.                 | S9  |
| <b>Preparative Irradiations</b>                                           | S12 |
| <b>X-ray Crystallography</b>                                              | S21 |
| <b>Fig. S1.</b> The X-ray crystal structure of <b>5g</b> .                | S21 |
| <b>Table S1.</b> Crystal data & structure refinement for <b>5g</b>        | S21 |
| <b>Fig. S2.</b> The X-ray crystal structure of <b>5i</b> .                | S22 |
| <b>Table S2.</b> Crystal data & structure refinement for <b>5i</b>        | S22 |
| <b>Table S3.</b> Coupling Constant between Protons at Ring Junction       | S24 |
| <b><i>In-situ</i> NMR Monitoring</b>                                      | S25 |
| <b>Fig S3.</b> Irradiation setup for <i>in-situ</i> NMR Monitoring        | S25 |
| <b>Fig S15.</b> Profile showing Lamp Output and Pyrex Absorbance          | S38 |
| <b>EPR Spectroscopy</b>                                                   | S39 |
| <b>DFT Optimised Structures</b>                                           | S44 |
| <b>DFT Optimised Energies</b>                                             | S58 |
| <b>References</b>                                                         | S64 |
| <b><sup>1</sup>H &amp; <sup>13</sup>C NMR Spectra for novel compounds</b> | S65 |

## General Experimental Section

All reagents and solvents were purchased from either Sigma Aldrich, Alfa Aesar or TCI Europe and used without further purification. Tetrahydrofuran was distilled over sodium and dichloromethane was distilled over calcium hydride. Column chromatography was carried out using Silica 60A (particle size 40-63  $\mu\text{m}$ , Silicycle, Canada) as the stationary phase, and TLC was performed on precoated silica gel plates (0.20 mm thick, Sil G UV<sub>254</sub>, Macherey-Nagel, Germany) and observed under UV light. <sup>1</sup>H and <sup>13</sup>C NMR spectra were recorded on Bruker AV III 500, Bruker AV II 400 and Bruker AV 300 instruments. Chemical shifts are reported in parts per million (ppm) from low to high frequency and referenced to the residual solvent resonance. Coupling constants (*J*) are reported in hertz (Hz). Standard abbreviations indicating multiplicity were used as follows: s = singlet, d = doublet, t = triplet, dd = double doublet, q = quartet, m = multiplet, b = broad. Melting points (M.p.) were determined using a Sanyo Gallenkamp apparatus and are reported uncorrected. Mass spectrometry was carried out at the EPSRC National Mass Spectrometry Service Centre, Swansea, UK. UV/Vis spectrometry was carried out using a Cary 50 spectrophotometer (Varian Inc.).

## General Procedure for the Preparation of Phenoxy- and Phenylthio-Acetic Acids

To a solution of the phenol/thiol (1 equiv.) in anhydrous THF was added methyl bromo acetate (2 equiv.) and potassium carbonate (5 equiv.) at room temperature. The resultant mixture was refluxed at 80°C for 48-72 hours. The mixture was concentrated under reduced pressure, dissolved in 100 mL CH<sub>2</sub>Cl<sub>2</sub>, washed with H<sub>2</sub>O (3 x 100 mL), dried over MgSO<sub>4</sub> and the solvent removed under reduced pressure. To a solution of the resultant ester (1 equiv.) in MeOH/H<sub>2</sub>O (3:1 v/v) was added LiOH (5 equiv.) at room temperature and allowed to stir overnight. The reaction mixture was concentrated under reduced pressure, dissolved in 100 mL saturated (NH<sub>4</sub>)<sub>2</sub>SO<sub>4</sub>, adjusted to ca. pH3 and extracted with EtOAc (3 x 100 mL). The combined extracts were dried over MgSO<sub>4</sub> and the solvent removed under reduced pressure.

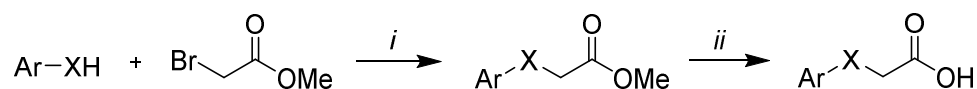

**Scheme S1.** Preparation of carboxylic acids. Reagents and conditions: (i) K<sub>2</sub>CO<sub>3</sub>, THF, reflux; (ii) LiOH, 3:1 MeOH/H<sub>2</sub>O, rt.

### 3,5-Dimethoxyphenoxyacetic acid 4g

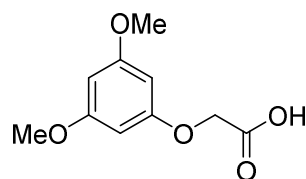

4g

Prepared from 3,5-dimethoxyphenol (3.01 g, 20 mmol), methyl bromoacetate (6.12 g, 40 mmol) and potassium carbonate (13.82 g, 100 mmol) in 100 mL THF. The resultant mixture was subjected to column chromatography on silica gel (eluent 50% CH<sub>2</sub>Cl<sub>2</sub> in pentanes) to yield methyl (3,5-dimethoxyphenoxy)acetate as an off white solid (4.43g, 97%). <sup>1</sup>H NMR (300 MHz, CDCl<sub>3</sub>, 294 K): δ = 3.75 (s, 6H, ArO-CH<sub>3</sub>), 3.80 (s, 3H, OCH<sub>3</sub>), 4.59 (s, 2H, ArOCH<sub>2</sub>), 6.08 (m, 2H, ArH), 6.11 (m, 1H, ArH); <sup>13</sup>C NMR (75 MHz, CDCl<sub>3</sub>, 296 K): δ = 52.7, 55.8, 65.6, 93.9, 94.3, 160.0, 162.0, 169.6. The ester (4.2 g, 18.6 mmol) was dissolved in 135 mL CH<sub>3</sub>OH and 45 mL H<sub>2</sub>O in and subjected to hydrolysis by lithium hydroxide (9.48 g, 92.8 mmol) to yield **X** as an off-white solid (3.47 g, 88%). <sup>1</sup>H NMR (300 MHz, *d*<sub>6</sub>-acetone, 294 K): δ = 3.75 (s, 6H, ArO-CH<sub>3</sub>), 4.13 (br-s, 1H, CO<sub>2</sub>H), 4.65 (s, 2H, ArOCH<sub>2</sub>), 6.11 (m, 3H, ArH); <sup>13</sup>C NMR (75 MHz, CDCl<sub>3</sub>, 295 K): δ = 55.6, 65.5, 94.2, 94.3, 161.0, 162.6, 170.2. Data consistent with literature.<sup>1</sup>

### 3,4,5-Trimethoxyphenoxyacetic acid 4h

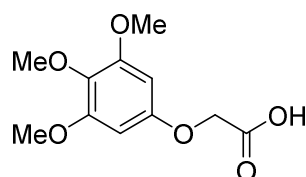

4h

Prepared from 3,4,5-trimethoxy phenol (3.68 g, 20 mmol), methyl bromoacetate (6.12 g, 40 mmol) and potassium carbonate (13.82 g, 100 mmol) in 100 mL THF. The resultant mixture was subjected to column chromatography on silica gel (eluent CH<sub>2</sub>Cl<sub>2</sub>) to yield methyl 3,4,5-trimethoxyphenoxyacetate as a colourless solid (3.27 g, 64%). <sup>1</sup>H NMR (300 MHz, CDCl<sub>3</sub>, 294 K): δ = 3.70 (s, 3H, OCH<sub>3</sub>), 3.74 (s, 3H, OCH<sub>3</sub>), 3.75 (s, 6H, ArOCH<sub>3</sub>), 4.53 (s, 2H, OCH<sub>2</sub>), 6.10 (s, 2H, ArH); <sup>13</sup>C NMR (75 MHz, CDCl<sub>3</sub>, 295 K): δ = 52.6, 56.5, 61.3, 66.1, 92.9, 133.4, 154.1, 154.7, 169.7. The ester (2.86 g, 11.1 mmol) was dissolved in 90 mL CH<sub>3</sub>OH and 30 mL H<sub>2</sub>O in and subjected to hydrolysis by lithium hydroxide (5.67 g, 55.5 mmol) to yield **X** as an off-white solid which was recrystallized from (1:5) acetone/cyclohexane (2.36 g, 88%). <sup>1</sup>H NMR (300 MHz, *d*<sub>6</sub>-acetone, 294 K): δ = 3.64 (s, 3H, ArOCH<sub>3</sub>), 3.79 (s, 6H,

ArOCH<sub>3</sub>), 4.52 (br-s, 1H, CO<sub>2</sub>H), 4.66 (s, 2H, OCH<sub>2</sub>), 6.27 (s, 2H, ArH); <sup>13</sup>C NMR (75 MHz, CDCl<sub>3</sub>, 295 K): δ = 56.4, 60.6, 65.8, 93.7, 133.8, 154.8, 155.6, 170.4. Data consistent with literature.<sup>1</sup>

#### 4-Methoxyphenylthioacetic acid 4j

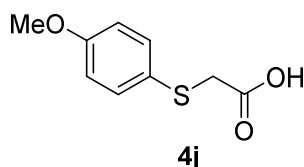

Prepared from 4-methoxybenzenethiol (2.8 g, 20 mmol), methyl bromoacetate (6.12 g, 40 mmol) and potassium carbonate (13.8 g, 100 mmol) in 100 mL THF. The resultant mixture was subjected to column chromatography on silica gel (eluent 50% CH<sub>2</sub>Cl<sub>2</sub> in pentanes) to yield methyl 4-methoxyphenylthioacetate as a colourless oil (3.64 g, 86%). <sup>1</sup>H NMR (300 MHz, CDCl<sub>3</sub>, 294 K): δ = 3.51 (s, 2H, SCH<sub>2</sub>), 3.68 (s, 3H, OCH<sub>3</sub>), 3.78 (s, 3H, ArOCH<sub>3</sub>), 6.83 (d, *J* = 8.9 Hz, 2H, ArH), 7.40 (d, *J* = 8.9 Hz, 2H, ArH); <sup>13</sup>C NMR (75 MHz, CDCl<sub>3</sub>, 296 K): δ = 38.5, 52.4, 55.3, 114.7, 124.9, 134.2, 159.7, 170.4. The ester (3.0 g, 14.1 mmol) was dissolved in 105 mL CH<sub>3</sub>OH and 35 mL H<sub>2</sub>O and subjected to hydrolysis by lithium hydroxide (6.56 g, 71 mmol) to yield **X** as an off-white solid which was recrystallized from (1:10) acetone/cyclohexane (2.77 g, 99%). <sup>1</sup>H NMR (400 MHz, CDCl<sub>3</sub>, 296 K): δ = 3.54 (s, 2H, SCH<sub>2</sub>), 3.79 (s, 3H, ArOCH<sub>3</sub>), 6.85 (d, *J* = 8.9 Hz, 2H, ArH), 7.43 (d, *J* = 8.9 Hz, 2H, ArH), 11.31 (br-s, 1H, CO<sub>2</sub>H); <sup>13</sup>C NMR (75 MHz, CDCl<sub>3</sub>, 295 K): δ = 38.6, 55.4, 114.8, 124.6, 134.3, 159.9, 176.3. Data consistent with literature.<sup>2</sup>

#### 4-(Methylthio)phenoxyacetic acid 4k

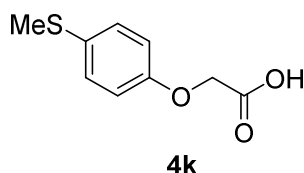

Prepared from 4-(methylthio)phenol (2.80 g, 20 mmol), methyl bromoacetate (6.12 g, 40 mmol) and potassium carbonate (13.80 g, 100 mmol) in 100 mL THF. The resultant mixture was subjected to column chromatography on silica gel (eluent 50% CH<sub>2</sub>Cl<sub>2</sub> in pentanes) to yield methyl 4-(methylthio)phenoxyacetate a colourless oil (3.07 g, 72%). <sup>1</sup>H NMR (400 MHz, CDCl<sub>3</sub>, 294 K): δ = 2.43 (s, 3H, ArS-CH<sub>3</sub>), 3.79 (s, 3H, CO<sub>2</sub>-CH<sub>3</sub>), 4.61 (s, 2H, ArO-CH<sub>2</sub>), 6.85 (m, 2H, ArH), 7.24 (m, 2H,

ArH);  $^{13}\text{C}$  NMR (75 MHz,  $\text{CDCl}_3$ , 295 K):  $\delta = 18.0, 52.7, 65.9, 155.8, 130.1, 130.8, 156.6, 169.7$ . This ester (2.50 g, 11.8 mmol) was dissolved 90 mL  $\text{CH}_3\text{OH}$  and 30 mL  $\text{H}_2\text{O}$  in and subjected to hydrolysis by lithium hydroxide (5.47 g, 59 mmol) to yield **X** as an off-white solid which was recrystallized from acetone/cyclohexane (1:10) to yield colorless needles (2.01 g, 86%). M.p. 108 °C.  $^1\text{H}$  NMR (400 MHz,  $\text{CDCl}_3$ , 296 K):  $\delta = 2.45$  (s, 3H, ArS- $\text{CH}_3$ ), 4.67 (s, 2H, ArO- $\text{CH}_2$ ), 6.86 (m, 2H, ArH), 7.26 (m, 2H, ArH), 9.54 (br-s, 1H,  $\text{CO}_2\text{H}$ );  $^{13}\text{C}$  NMR (75 MHz,  $\text{CDCl}_3$ , 297 K):  $\delta = 55.6, 65.5, 94.2, 94.3, 161.0, 162.6, 170.2$ ; LR-ESIMS:  $m/z = 199$   $[\text{MH}]^+$ ; HR-ESIMS:  $m/z = 199.0424$  (calcd. for  $\text{C}_9\text{H}_{11}\text{O}_3\text{S}$ , 199.0429).

## Benzyl (4-methoxyphenoxy)acetate **15**

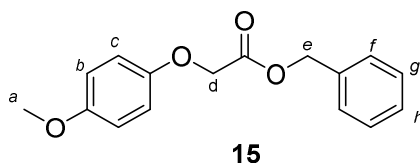

**15** was prepared by stirring (4-methoxyphenoxy)acetic acid (182.2 mg, 1 mmol), benzyl alcohol (119 mg, 1.1 mmol), *N,N'*-dicyclohexylcarbodiimide (413 mg, 1.1 mmol) and 4-dimethylaminopyridine (12 mg, 0.1 mmol) in anhydrous  $\text{CH}_2\text{Cl}_2$  (25 mL) overnight at room temperature in an argon atmosphere. The dicyclohexylurea biproduct was removed by filtration and the filtrate washed with water (3 x 30 mL) 5% acetic acid solution (3 x 30 mL), again with water (3 x 30 mL) and dried over anhydrous  $\text{MgSO}_4$ . The solvent was removed under reduced pressure and the crude reaction mixture purified by column chromatography on silica gel (eluent:  $\text{CH}_2\text{Cl}_2$ ) to yield **15** as a clear oil (160.7 mg, 59%).  $^1\text{H}$  NMR (400 MHz,  $\text{CDCl}_3$ , 300 K):  $\delta$  = 3.77 (s, 3H,  $\text{H}_a$ ), 4.62 (s, 2H,  $\text{H}_d$ ), 5.24 (s, 2H,  $\text{H}_e$ ), 6.80-6.87 (m, 4H,  $\text{H}_{b,c}$ ), 7.33-7.37 (m, 5H,  $\text{H}_{f,g,h}$ );  $^{13}\text{C}$  NMR (100 MHz,  $\text{CDCl}_3$ , 300 K):  $\delta$  = 55.7, 66.4, 67.0, 114.7, 116.0, 128.5, 128.5, 128.7, 135.2, 152.0, 154.6, 169.1; LR-ESIMS:  $m/z$  = 290 [ $\text{MNH}_4$ ] $^+$ ; HR-ESIMS:  $m/z$  = 290.1390 (calcd. for  $\text{C}_{16}\text{H}_{20}\text{NO}_4$ , 290.1387).

## Dibenzyl 2,2'-(1,4-phenylenebis(oxy))diacetate **18**

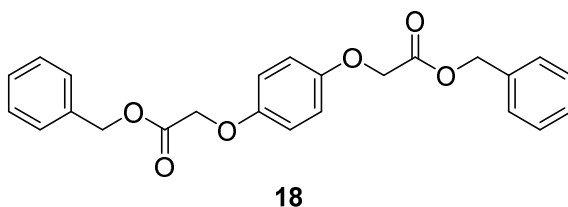

Hydroquinone-O,O'-dicacetic acid (452.4 mg, 2.0 mmol) and benzyl alcohol (0.19 mL, 2.2 mmol) were dissolved in 20 mL anhydrous DMF. This mixture was cooled to 0°C and to it was added 1-Ethyl-3-(3-dimethylaminopropyl)carbodiimide (0.39 mL, 2.2 mmol) and then DMAP (24.4 mg, 0.2 mmol). The mixture was then allowed to warm to room temperature and stirred overnight. The mixture was then concentrated, the resultant residue taken up in 50 mL EtOAc, washed with  $\text{H}_2\text{O}$  (3 x 100 mL) and dried over  $\text{MgSO}_4$ . The solvent was removed under reduced pressure to yield **18** as a clear oil (118.5 mg, 15%).  $^1\text{H}$  NMR (500 MHz, *d6*-acetone, 295 K):  $\delta$  = 4.73 (s, 4H,  $\text{ArOCH}_2$ ), 5.22 (s, 4H,  $\text{CO}_2\text{CH}_2\text{Ph}$ ), 6.88 (s, 4H,  $\text{ArH}$ ), 7.35-7.40 (m, 10H,  $\text{ArH}$ );  $^{13}\text{C}$  NMR (75 MHz, *d6*-acetone, 297 K):  $\delta$  = 66.5, 67.0, 116.5, 128.9, 129.0, 129.4, 137.0, 153.8, 169.6; LR-ESIMS:  $m/z$  = 424 [ $\text{MNH}_4$ ] $^+$ ; HR-ESIMS:  $m/z$  = 424.1755 (calcd. for  $\text{C}_{24}\text{H}_{26}\text{NO}_6$ , 424.1760).

## Optimisation Studies

The reaction between 4-methoxyphenoxyacetic acid **4d** and maleimide **1a** was used as a test reaction to determine the optimum reaction conditions. Early work indicated that the reaction generally needed to be run overnight. However, for the purposes of optimisation a reaction time of 5 hours was adopted.

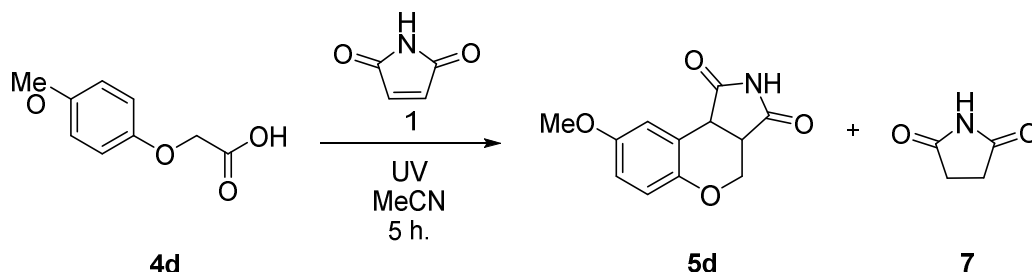

**Scheme S2.** Test reaction for optimisation studies.

## Reaction Stoichiometry

4-Methoxyphenoxyacetic acid **4d** (47.4 mg, 0.26 mmol) was dissolved in 10 mL anhydrous MeCN along with various equivalents of maleimide **1**. The resultant mixture was degassed for 15 minutes by argon bubbling before being irradiated for 5 hours by two hemispherical banks of six Philips Cleo 15W tubes. The solvent was then removed under reduced pressure and the concentration of reagents and products were determined by  $^1\text{H}$  NMR in  $d_6$ -acetone with reference to  $\text{CH}_2\text{Br}_2$  internal standard. This data is summarised in the following table:

| <b>4d</b><br>(mol eq.) | <b>1a</b><br>(mol eq.) | % Conversion   | % Yield<br><b>5d</b> | % Yield<br><b>7</b> |
|------------------------|------------------------|----------------|----------------------|---------------------|
| 1                      | 1                      | 28             | 22                   | 13                  |
| 1                      | 2                      | 51             | 33                   | 9                   |
| 1                      | 4                      | 66             | 41                   | 5                   |
| 1                      | 10                     | - <sup>a</sup> | -                    | -                   |

[a] Concentrations of reagents and products could not be determined as the sample repeatedly failed to shim.

## Reaction Medium

4-Methoxyphenoxyacetic acid **4d** (47.4 mg, 0.26 mmol) and maleimide **1** (101.6 mg, 1.04 mmol) were dissolved in a variety of solvents. The resultant mixtures were degassed for 15 minutes by argon bubbling before being irradiated for 5 hours by two hemispherical banks of six Philips Cleo 15W tubes. A 2 mL aliquot of the reaction mixture was taken at this time, the solvent was then removed under reduced pressure and the concentration of reagents and products were determined by  $^1\text{H}$  NMR in  $d_6$ -acetone with reference to  $\text{CH}_2\text{Br}_2$  internal standard. This data is summarised in the following table:



| Solvent                                | % Conversion | % Yield 5d | % Yield 7 |
|----------------------------------------|--------------|------------|-----------|
| MeCN <sup>a</sup>                      | 66%          | 41%        | 5%        |
| MeOH <sup>a</sup>                      | 60%          | 40%        | 5%        |
| t-BuOH <sup>b</sup>                    | 44%          | 37%        | 5%        |
| Acetone <sup>c</sup>                   | 15%          | 12%        | <1%       |
| DMF <sup>d</sup>                       | -            | -          | -         |
| DCM <sup>a</sup>                       | -            | -          | -         |
| Benzene <sup>b</sup>                   | -            | -          | -         |
| H <sub>2</sub> O                       | -            | -          | -         |
| 35% H <sub>2</sub> O/MeCN <sup>b</sup> | 84%          | 61%        | 5%        |

[a] anhydrous, freshly distilled [b] used straight from bottle [c] dried o/n with 4Å mol. sieves [d] purchased anhydrous.

## Variation of Maleate

### 8-Methoxy-2-methyl-3a,4-dihydrochromeno[3,4-c]pyrrole-1,3(2*H*,9*bH*)-dione.

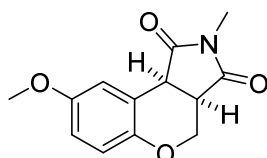

*N*-Methylmaleimide (417 mg, 3.75 mmol) and 4-methoxyphenoxyacetic acid (137mg, 0.75 mmol) were dissolved in 13 mL CH<sub>3</sub>CN and 7 mL H<sub>2</sub>O and irradiated through pyrex for 18 hours. Following irradiation a 0.5 mL aliquot was taken from the reaction mixture and the solvent was removed under reduced pressure. <sup>1</sup>H NMR analysis (w.r.t. CH<sub>2</sub>Br<sub>2</sub> standard) of the resultant mixture revealed: 8-methoxy-2-methyl-3a,4-dihydrochromeno[3,4-c]pyrrole-1,3(2*H*,9*bH*)-dione (0.19 mmol, 25%), and unreacted **4d** (0.53 mmol, 70%).

### Attempted synthesis of 8-methoxy-2-phenyl-3a,4-dihydrochromeno[3,4-c]pyrrole-1,3(2*H*,9*bH*)-dione.

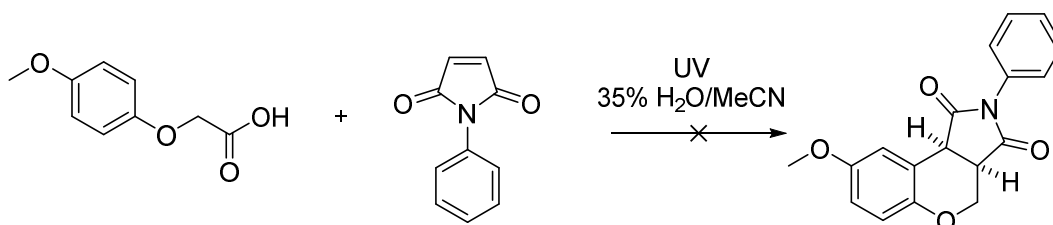

*N*-phenylmaleimide (1299 mg, 7.5 mmol) and 4-methoxyphenoxyacetic acid (137mg, 0.75 mmol) were dissolved in 13 mL CH<sub>3</sub>CN and 7 mL H<sub>2</sub>O and irradiated through pyrex for 18 hours. Following irradiation a 0.5 mL aliquot was taken from the reaction mixture and the solvent was removed under reduced pressure. <sup>1</sup>H NMR analysis revealed only starting materials present.

### Attempted synthesis of 8-methoxy-3a,4-dihydro-1*H*-furo[3,4-c]chromene-1,3(9*bH*)-dione

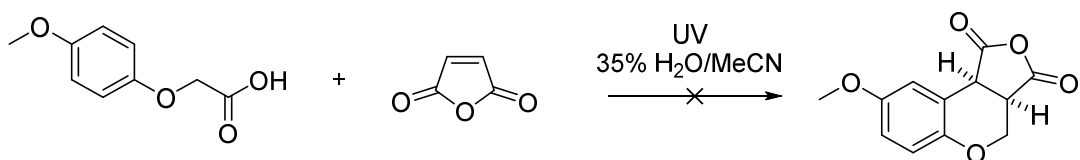

Maleic anhydride (736 mg, 7.5 mmol) and 4-methoxyphenoxyacetic acid (137mg, 0.75 mmol) were dissolved in 13 mL CH<sub>3</sub>CN and 7 mL H<sub>2</sub>O and irradiated through pyrex for 18 hours. Following irradiation a 0.5 mL aliquot was taken from the reaction mixture and the solvent was removed under reduced pressure. <sup>1</sup>H NMR analysis revealed only starting materials present.

Based on this work it was decided to use a five-fold excess of **1a** with a variety of acids **4** in 35% H<sub>2</sub>O/MeCN as the optimum reaction conditions.

## General Procedure for Preparative Irradiations

Known amounts of desired reagents were dissolved in a mixture of 35 : 65 H<sub>2</sub>O in MeCN. The resulting mixture was degassed by bubbling with argon for 20 minutes. The mixture was then irradiated with twelve 29 cm 15 W Philips Cleo tubes ( $\lambda = 350$  nm) arranged in two hemispherical banks of six for the desired reaction time. Following irradiation the solvent was removed under reduced pressure and the crude reaction mixture was purified if necessary. All reagents were commercially available, MeCN was used as purchased and H<sub>2</sub>O was deionised.

### 3a,4-Dihydrochromeno[3,4-c]pyrrole-1,3(2*H*,9*bH*)-dione **5a** (Table 1, Entry 1).

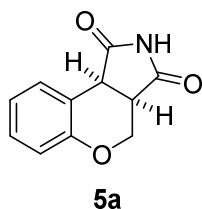

Maleimide (366 mg, 3.75 mmol) and phenoxyacetic acid (114 mg, 0.75 mmol) were dissolved in 13 mL CH<sub>3</sub>CN and 7 mL H<sub>2</sub>O and irradiated through Pyrex for 18 hours. Following irradiation the reaction mixture was concentrated under reduced pressure. <sup>1</sup>H NMR analysis revealed that the desired product **5a** had not been formed.

### 8-Methyl-3a,4-dihydrochromeno[3,4-c]pyrrole-1,3(2*H*,9*bH*)-dione **5b** (Table 1, Entry 2)

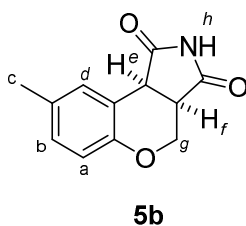

Maleimide (732 mg, 7.5 mmol) and 4-methylphenoxyacetic acid (124.7 mg, 0.75 mmol) were dissolved in 13 mL CH<sub>3</sub>CN and 7 mL H<sub>2</sub>O and irradiated through pyrex for 25 hours. Following irradiation the reaction mixture was concentrated under reduced pressure and the crude mixture was purified by column chromatography on silica gel (eluent: 10% EtOAc in CH<sub>2</sub>Cl<sub>2</sub>) to yield **5b** as a colourless solid (46.6 mg, 29%). M.p. 172 °C. <sup>1</sup>H NMR (400 MHz, *d*6-acetone, 295 K):  $\delta = 2.27$  (s, 3H, H<sub>c</sub>), 3.59 (m, 1H, H<sub>f</sub>), 3.93 (dd,  $J = 3.9, 11.3$  Hz, 1H, H<sub>g</sub>), 4.12 (d,  $J = 9.2$  Hz, 1H, H<sub>e</sub>), 4.51 (dd,  $J = 2.6, 11.2$  Hz, 1H, H<sub>g'</sub>), 6.74 (d,  $J = 8.3$  Hz, 1H, H<sub>a</sub>), 7.00 (d,  $J =$  Hz, 1H, H<sub>b</sub>), 7.30 (s, 1H, H<sub>d</sub>), 10.15 (br-s, 1H, H<sub>h</sub>); <sup>13</sup>C NMR (75 MHz,

*d6*-acetone, 295 K):  $\delta = 20.7, 41.9, 44.3, 64.8, 118.0, 119.4, 131.3, 132.1, 136.0, 154.2, 177.6, 178.5$ ; LR-ESIMS:  $m/z = 218$   $[MH]^+$ ; HR-ESIMS:  $m/z = 218.0814$  (calcd. for  $C_{12}H_{12}NO_3$ , 218.0817).

### 8-(*tert*-Butyl)-3a,4-dihydrochromeno[3,4-*c*]pyrrole-1,3(2*H*,9*bH*)-dione **5c** (Table 1, Entry 3)

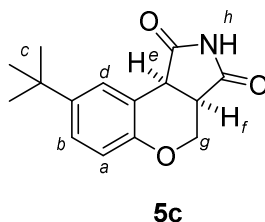

Maleimide (732 mg, 7.5 mmol) and 4-*tert*-butylphenoxyacetic acid (156 mg, 0.75 mmol) were dissolved in 13 mL  $CH_3CN$  and 7 mL  $H_2O$  and irradiated through pyrex for 18 hours. Following irradiation the reaction mixture was concentrated under reduced pressure and the crude mixture was purified by column chromatography on silica gel (eluent: 5-10% acetone in  $CH_2Cl_2$ ) to yield **5b** as a colourless solid (104 mg, 54%). Mp 174 °C.  $^1H$  NMR (400 MHz, *d6*-acetone, 295 K):  $\delta = 1.30$  (s, 9H,  $H_c$ ), 3.58-3.62 (m, 1H,  $H_f$ ), 3.95 (dd,  $J = 4.0, 11.3$  Hz, 1H,  $H_g$ ), 4.16 (d,  $J = 9.2$  Hz, 1H,  $H_e$ ), 4.51 (dd,  $J = 2.7, 11.3$  Hz, 1H,  $H_g'$ ), 6.78 (d,  $J = 8.5$  Hz, 1H,  $H_a$ ), 7.25 (dd,  $J = 2.5, 8.6$  Hz, 1H,  $H_b$ ), 7.55 (d,  $J = 2.5$  Hz, 1H,  $H_d$ ), 10.15 (br-s, 1H,  $H_h$ );  $^{13}C$  NMR (75 MHz, *d6*-acetone, 297 K):  $\delta = 31.8, 34.8, 42.0, 44.3, 64.7, 117.7, 118.9, 126.4, 127.8, 145.6, 154.1, 177.7, 178.5$ ; LR-ESIMS:  $m/z = 282$   $[MNa]^+$ ; HR-ESIMS:  $m/z = 282.1103$  (calcd. for  $C_{15}H_{17}NO_3Na$ , 282.1106).

### 8-Methoxy-3a,4-dihydrochromeno[3,4-*c*]pyrrole-1,3(2*H*,9*bH*)-dione **5d** (Table 1, Entry 4)

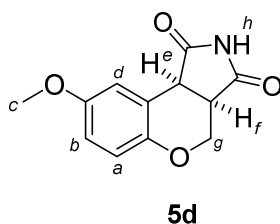

Maleimide (366 mg, 3.75 mmol) and 4-(methoxy)phenoxyacetic acid (137 mg, 0.75 mmol) were dissolved in 13 mL  $CH_3CN$  and 7 mL  $H_2O$  and irradiated through pyrex for 18 hours. Following irradiation the reaction mixture was concentrated under reduced pressure and the crude mixture was purified by column chromatography on silica gel (eluent: 10% EtOAc in  $CH_2Cl_2$ ) to yield **5d** as an off-white solid (93.9 mg, 54%). M.p. 217 °C.  $^1H$  NMR (300 MHz, *d6*-acetone, 295 K):  $\delta = 3.55$ -3.60 (m, 1H,  $H_f$ ), 3.88 (s, 3H,  $H_c$ ), 3.91 (dd,  $J = 4.0, 11.2$  Hz, 1H,  $H_g$ ), 4.16 (d,  $J = 9.4$  Hz, 1H,  $H_e$ ), 4.50 (dd,  $J =$

2.5, 11.2 Hz, 1H, H<sub>g</sub>), 6.79 (m, 2H, Ar-H), 7.06 (m, 1H, Ar-H), 10.18 (br-s, 1H, H<sub>h</sub>); <sup>13</sup>C NMR (75 MHz, *d6*-acetone, 295 K):  $\delta$  = 42.2, 44.3, 56.0, 65.0, 115.3, 115.4, 118.9, 120.4, 150.3, 155.6, 177.5, 178.6; LR-EIMS:  $m/z$  = 233 [M]<sup>+</sup>; HR-ESIMS:  $m/z$  = 233.0680 (calcd. for C<sub>12</sub>H<sub>11</sub>NO<sub>4</sub>, 233.0683).

**7-Methoxy-3a,4-dihydrochromeno[3,4-*c*]pyrrole-1,3(2*H*,9*bH*)-dione 5e & 9-methoxy-3a,4-dihydrochromeno[3,4-*c*]pyrrole-1,3(2*H*,9*bH*)-dione 5e'** (Table 1, Entry 5)

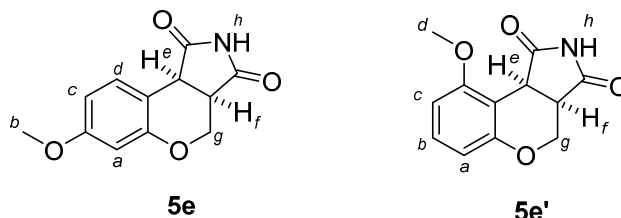

Maleimide (366 mg, 3.75 mmol) and 3-(methoxy)phenoxyacetic acid (137 mg, 0.75 mmol) were dissolved in 13 mL CH<sub>3</sub>CN and 7 mL H<sub>2</sub>O and irradiated through pyrex for 18 hours. Following irradiation the reaction mixture was concentrated under reduced pressure and the crude mixture was purified by column chromatography on silica gel (eluent: 5% EtOAc in CH<sub>2</sub>Cl<sub>2</sub>) to yield **5e** as an off-white solid (111 mg, 64%). M.p. 156 °C. <sup>1</sup>H NMR (300 MHz, *d6*-acetone, 295 K):  $\delta$  = 3.55-3.60 (m, 1H, H<sub>f</sub>), 3.74 (s, 3H, H<sub>b</sub>), 3.95 (dd,  $J$  = 4.0, 11.4 Hz, 1H, H<sub>g</sub>), 4.08 (d,  $J$  = 9.2 Hz, 1H, H<sub>e</sub>), 4.53 (dd,  $J$  = 2.7, 11.3 Hz, 1H, H<sub>g'</sub>), 6.42 (d,  $J$  = 2.6 Hz, 1H, H<sub>a</sub>), 6.61 (dd,  $J$  = 2.8, 8.7 Hz, 1H, H<sub>c</sub>), 7.39 (d,  $J$  = 8.3 Hz, 1H, H<sub>d</sub>), 10.14 (br-s, 1H, H<sub>h</sub>); <sup>13</sup>C NMR (75 MHz, *d6*-acetone, 296 K):  $\delta$  = 41.2, 44.1, 55.7, 64.7, 103.1, 109.9, 111.5, 131.7, 157.2, 161.0, 178.1, 178.6; LR-ESIMS:  $m/z$  = 234 [MH]<sup>+</sup>; HR-ESIMS:  $m/z$  = 234.0765 (calcd. for C<sub>12</sub>H<sub>12</sub>NO<sub>4</sub>, 234.0766). As above to yield **5e'** as a yellow oil (28.2 mg, 16%). <sup>1</sup>H NMR (300 MHz, *d6*-acetone, 294 K):  $\delta$  = 3.52-3.57 (m, 1h, H<sub>f</sub>), 3.79 (dd,  $J$  = 4.3, 11.2 Hz, 1H, H<sub>g</sub>), 3.87 (s, 3H, H<sub>d</sub>), 4.54 (dd,  $J$  = 1.8, 11.2 Hz, 1H, H<sub>g'</sub>), 4.60 (d,  $J$  = 9.7 Hz, 1H, H<sub>e</sub>), 6.50 (d,  $J$  = 8.2 Hz, 1H, Ar-H), 6.71 (d,  $J$  = 8.3 Hz, 1H, Ar-H), 7.15 (t,  $J$  = 8.2 Hz, 1H, Ar-H), 10.14 (br-s, 1H, H<sub>h</sub>); <sup>13</sup>C NMR (75 MHz, *d6*-acetone, 294 K):  $\delta$  = 37.5, 45.0, 56.4, 66.7, 106.3, 110.9, 139.4, 158.5, 160.1, 176.7, 179.0; LR-EIMS:  $m/z$  = 234 [MH]<sup>+</sup>; HR-ESIMS  $m/z$  = 234.0763 (calcd. for C<sub>12</sub>H<sub>12</sub>NO<sub>4</sub>, 234.0766).

**3a,4-Dihydrochromeno[3,4-*c*]pyrrole-1,3(2*H*,9*bH*)-dione 5a** (Table 1, Entry 6)

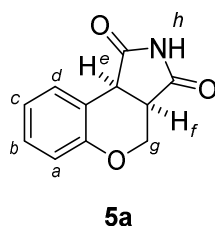

Maleimide (366 mg, 3.75 mmol) and 2-(methoxy)phenoxyacetic acid (137 mg, 0.75 mmol) were dissolved in 13 mL CH<sub>3</sub>CN and 7 mL H<sub>2</sub>O and irradiated through pyrex for 18 hours. Following irradiation the reaction mixture was concentrated under reduced pressure and the crude mixture was purified by column chromatography on silica gel (eluent: 10% EtOAc in CH<sub>2</sub>Cl<sub>2</sub>) to yield **5a** as a colourless solid (81.5 mg, 54%). <sup>1</sup>H NMR (300 MHz, *d*6-acetone, 295 K):  $\delta$  = 3.61-3.67 (m, 1H, H<sub>f</sub>), 4.00 (dd, *J* = 4.2, 11.5 Hz 1H, H<sub>g</sub>), 4.19 (d, *J* = 9.2 Hz, 1H, H<sub>e</sub>), 4.55 (dd, *J* = 3.1, 11.4 Hz 1H, H<sub>g'</sub>), 6.87 (d, *J* = 8.2 Hz, 1H, H<sub>d</sub>), 7.03 (t, *J* = 8.2 Hz, 1H, H<sub>c</sub>), 7.22 (t, *J* = 8.0 Hz, 1H, H<sub>b</sub>), 7.51 (d, *J* = 7.8 Hz, 1H, H<sub>a</sub>), 10.18 (br-s, 1H, H<sub>h</sub>). Consistent with literature.<sup>3</sup>

### 7,9-Dimethoxy-3a,4-dihydrochromeno[3,4-*c*]pyrrole-1,3(2*H*,9*bH*)-dione **5g** (Table 1, Entry 7)

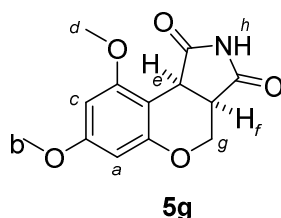

Maleimide (366 mg, 3.75 mmol) and 3,5-dimethoxyphenoxyacetic acid (159.2 mg, 0.75 mmol) were dissolved in 13 mL CH<sub>3</sub>CN and 7 mL H<sub>2</sub>O and irradiated through pyrex for 18 hours. Following irradiation the reaction mixture was concentrated under reduced pressure and the crude mixture was purified by column chromatography on silica gel (eluent: 10-20% EtOAc in CH<sub>2</sub>Cl<sub>2</sub>) to yield **5g** as a colourless solid (161 mg, 82%). M.p. 236 °C. <sup>1</sup>H NMR (300 MHz, *d*6-acetone, 296 K):  $\delta$  = 3.52-3.58 (m, 1H, H<sub>f</sub>), 3.79 (s, 3H, OCH<sub>3</sub>), 3.82 (dd, *J* = 4.3, 11.2 Hz, 1H, H<sub>g</sub>), 3.89 (s, 3H, OCH<sub>3</sub>), 4.50 (d, *J* = 9.7 Hz, 1H, H<sub>e</sub>), 4.55 (dd, *J* = 1.8, 11.2 Hz, 1H, H<sub>g</sub>'), 6.12 (d, *J* = 2.3 Hz, 1H, ArH), 6.32 (d, *J* = 2.3 Hz, 1H, ArH), 10.14 (br-s, 1H, H<sub>h</sub>); <sup>13</sup>C NMR (75 MHz, *d*6-DMSO, 297 K):  $\delta$  = 35.9, 43.5, 55.2, 55.8, 65.7, 93.6, 94.7, 101.6, 157.6, 159.2, 177.2, 179.2; LR-ESIMS: *m/z* = 264 [MH]<sup>+</sup>; HR-ESIMS: *m/z* = 246.0869 (calcd. for C<sub>13</sub>H<sub>14</sub>NO<sub>5</sub>, 264.0872).

### 7,8,9-Trimethoxy-3a,4-dihydrochromeno[3,4-*c*]pyrrole-1,3(2*H*,9*bH*)-dione **5h** (Table 1, Entry 8)

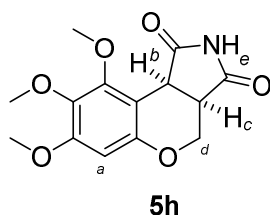

Maleimide (366 mg, 3.75 mmol) and 3,4,5-trimethoxyphenoxyacetic (181.7 mg, 0.75 mmol) were dissolved in 13 mL CH<sub>3</sub>CN and 7 mL H<sub>2</sub>O and irradiated through pyrex for 64 hours. Following

irradiation the reaction mixture was concentrated under reduced pressure, diluted with 100 mL CH<sub>2</sub>Cl<sub>2</sub>, washed with saturated aqueous NaHCO<sub>3</sub> (100 mL), deionised water (2 x 100 mL), dried over anhydrous MgSO<sub>4</sub> and the solvent evaporated to yield **5h** as a yellow solid (52.2 mg, 24%). Mp 165 °C. <sup>1</sup>H NMR (400 MHz, *d6*-acetone, 295 K):  $\delta$  = 3.48-3.52 (m, 1H, H<sub>c</sub>), 3.74 (dd-overlapped, *J* = 4.4, 11.2 Hz, 1H, H<sub>d</sub>), 3.75 (s-overlapped, 3H, Ar-OCH<sub>3</sub>), 3.79 (s, 3H, Ar-OCH<sub>3</sub>), 4.04 (s, 3H, Ar-OCH<sub>3</sub>), 4.49 (d-overlapped, *J* = 9.7 Hz, 1H, H<sub>b</sub>), 4.50 (dd-overlapped, *J* = 1.7, 11.2 Hz, 1H, H<sub>d'</sub>), 6.31 (s, 1H, H<sub>a</sub>), 10.21 (br-s, 1H, H<sub>e</sub>); <sup>13</sup>C NMR (75 MHz, *d6*-acetone, 297 K):  $\delta$  = 37.7, 44.9, 56.3, 60.7, 61.7, 67.0, 98.1, 107.1, 136.0, 138.6, 153.7, 154.6, 177.4, 179.2; LR-ESIMS: *m/z* = 294 [MH]<sup>+</sup>; HR-ESIMS: *m/z* = 294.0975 (calcd. for C<sub>14</sub>H<sub>16</sub>NO<sub>6</sub>, 294.0978). Analysis of the reaction mixture by <sup>1</sup>H NMR prior to chromatography revealed 71% unreacted 3,4,5-trimethoxyphenoxyacetic (0.53 mmol w.r.t. **5h**) indicating that the reaction had achieved only 29% conversion.

### 3a,4-Dihydrothiochromeno[3,4-*c*]pyrrole-1,3(2*H*,9*bH*)-dione **5i** (Table 1, Entry 9)

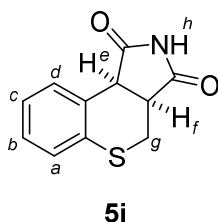

Maleimide (366 mg, 3.75 mmol) and phenylthioacetic acid (126 mg, 0.75 mmol) were dissolved in 13 mL CH<sub>3</sub>CN and 7 mL H<sub>2</sub>O and irradiated through pyrex for 18 hours. Following irradiation the reaction mixture was concentrated under reduced pressure and the crude mixture was purified by column chromatography on silica gel (eluent: 7.5% EtOAc in CH<sub>2</sub>Cl<sub>2</sub>) to yield **5i** as a colourless solid (62.9 mg, 39%). Mp 157 °C. <sup>1</sup>H NMR (300 MHz, *d6*-acetone, 295 K):  $\delta$  = 2.91 (dd, *J* = 4.9, 13.3 Hz, 1H, H<sub>g</sub>), 3.26 (dd, *J* = 2.4, 13.3 Hz, 1H, H<sub>g'</sub>), 3.82-3.88 (m, 1H, H<sub>f</sub>), 4.35 (d, *J* = 9.5 Hz, 1H, H<sub>e</sub>), 7.20-7.30 (m, 3H, ArH), 7.43-7.49 (m, 1H, ArH), 10.37 (br-s, 1H, H<sub>h</sub>); <sup>13</sup>C NMR (75 MHz, *d6*-acetone, 295 K):  $\delta$  = 30.1, 46.4, 47.2, 127.3, 128.4, 129.9, 132.5, 133.1, 135.4, 177.3, 179.3; LR-ESIMS: *m/z* = 237 [MNH<sub>4</sub>]<sup>+</sup>; HR-ESIMS: *m/z* = 237.0696 (calcd. for C<sub>11</sub>H<sub>13</sub>N<sub>2</sub>O<sub>2</sub>S, 237.0698).

### 8-Methoxy-3a,4-dihydrothiochromeno[3,4-*c*]pyrrole-1,3(2*H*,9*bH*)-dione **5j** (Table 1, Entry 10)

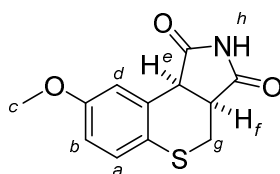

**5j**

Maleimide (366 mg, 3.75 mmol) and 4-methoxyphenylthioacetic acid (148.6 mg, 0.75 mmol) were dissolved in 13 mL CH<sub>3</sub>CN and 7 mL H<sub>2</sub>O and irradiated through pyrex for 72 hours. Following irradiation the reaction mixture was concentrated under reduced pressure and the crude mixture was purified by column chromatography on silica gel (eluent: 10-20% EtOAc in CH<sub>2</sub>Cl<sub>2</sub>) to yield **5j** as a yellow oil (67.5 mg, 36%). <sup>1</sup>H NMR (300 MHz, *d6*-acetone, 296 K):  $\delta$  = 2.85 (dd, *J* = 4.9, 13.3 Hz, 1H, H<sub>g</sub>), 3.23 (dd, *J* = 2.3, 13.3 Hz, 1H, H<sub>g'</sub>), 3.77-3.83 (m, overlapped, 1H, H<sub>f</sub>), 3.81 (s, overlapped, 3H, H<sub>c</sub>), 4.31 (d, *J* = 9.4 Hz, 1H, H<sub>e</sub>), 6.84 (dd, *J* = 2.8, 8.7 Hz, 1H, H<sub>b</sub>), 7.05 (d, *J* = 2.7 Hz, 1H, H<sub>d</sub>), 7.20 (d, *J* = 8.6 Hz, 1H, H<sub>a</sub>), 10.37 (br-s, 1H, H<sub>h</sub>); <sup>13</sup>C NMR (75 MHz, *d6*-acetone, 297 K):  $\delta$  = 30.7, 46.2, 47.6, 55.8, 114.2, 118.8, 126.1, 130.9, 133.8, 159.4, 177.2, 179.4; LR-ESIMS: *m/z* = 250 [MH]<sup>+</sup>; HR-ESIMS: *m/z* = 250.0535 (calcd. for C<sub>12</sub>H<sub>12</sub>NO<sub>3</sub>S, 250.0538).

**8-(Methylthio)-3a,4-dihydrochromeno[3,4-c]pyrrole-1,3(2H,9bH)-dione 5k (Table 1, Entry 11)**

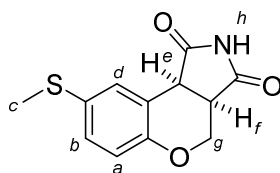

**5k**

Maleimide (366 mg, 3.75 mmol) and 4-methylthiophenoxyacetic acid (148.6 mg, 0.75 mmol) were dissolved in 13 mL CH<sub>3</sub>CN and 7 mL H<sub>2</sub>O and irradiated through pyrex for 72 hours. Following irradiation the reaction mixture was concentrated under reduced pressure and the crude mixture was purified by column chromatography on silica gel (eluent: 10% EtOAc in CH<sub>2</sub>Cl<sub>2</sub>) to yield **5k** as a off-white solid (27.3 mg, 14%). M.p. 160 °C. <sup>1</sup>H NMR (400 MHz, *d6*-acetone, 300 K):  $\delta$  = 2.46 (s, 3H, H<sub>c</sub>), 3.61-3.64 (m, 1H, H<sub>f</sub>), 3.98 (dd, *J* = 4.1, 11.3 Hz, 1H, H<sub>g</sub>), 4.18 (d, *J* = 9.2 Hz, 1H, H<sub>e</sub>), 4.53 (dd, *J* = 2.8, 11.3 Hz, 1H, H<sub>g</sub>), 6.84 (d, *J* = 8.5 Hz, 1H, H<sub>a</sub>), 7.16 (dd, *J* = 2.3, 8.5 Hz, 1H, H<sub>b</sub>), 7.47 (d, *J* = 2.3 Hz, 1H, H<sub>d</sub>), 10.16 (br-s, 1H, H<sub>h</sub>); <sup>13</sup>C NMR (100 MHz, CDCl<sub>3</sub>, 296 K):  $\delta$  = 17.2, 40.8, 43.2, 63.8, 117.7, 118.5, 128.9, 129.0, 131.9, 153.4, 175.7, 176.6; LR-ESIMS: *m/z* = 272 [MNa]<sup>+</sup>; HR-ESIMS: *m/z* = 272.0354 (calcd. for C<sub>12</sub>H<sub>11</sub>NO<sub>3</sub>SNa, 272.0357). Analysis of the reaction mixture by <sup>1</sup>H NMR prior to



chromatography revealed 47% unreacted 4-methylthiophenoxyacetic acid (0.35 mmol w.r.t. **5k**) indicating that the reaction had achieved only 53% conversion.

### 3a,4,5,9b-Tetrahydro-1*H*-pyrrolo[3,4-*c*]quinoline-1,3(2*H*)-dione **5l** (Table 1, Entry 12)

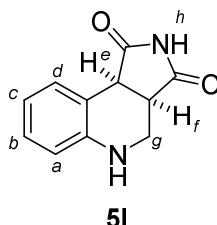

Maleimide (366 mg, 3.75 mmol) and *N*-phenylglycine (113.4 mg, 0.75 mmol) were dissolved in 13 mL CH<sub>3</sub>CN and 7 mL H<sub>2</sub>O and irradiated through pyrex for 18 hours. Following irradiation the reaction mixture was concentrated under reduced pressure and the crude mixture was purified by column chromatography on silica gel (eluent: 20% EtOAc in CH<sub>2</sub>Cl<sub>2</sub>) to yield **5l** as an off-white solid (135 mg, 89%). M.p. 173-176 °C. <sup>1</sup>H NMR (500 MHz, *d*<sub>6</sub>-acetone, 293 K): δ = 3.12 (dd, *J* = 4.4, 11.3 Hz, 1H, H<sub>g</sub>), 3.47-3.51 (m, 1H, H<sub>f</sub>), 3.54 (dt, *J* = 3.0, 11.3 Hz, 1H, H<sub>g</sub>), 4.04 (d, *J* = 9.3 Hz, 1H, H<sub>e</sub>), 5.00 (br-s, 1H, H<sub>h</sub>), 6.68 (d, *J* = 7.9 Hz, 1H, Ar*H*), 6.72 (t, *J* = 7.5 Hz, 1H, Ar*H*), 7.01 (t, *J* = 7.4 Hz, 1H, Ar*H*), 7.36 (d, *J* = 7.6 Hz, 1H, Ar*H*), 10.04 (br-s, 1H, H<sub>i</sub>); <sup>13</sup>C NMR (75 MHz, *d*<sub>6</sub>-acetone, 298 K): δ = 41.9, 43.5, 45.2, 116.2, 118.5, 119.5, 128.5, 131.1, 148.1, 178.2, 179.9; LR-ESIMS: *m/z* = 203 [MH]<sup>+</sup>; HR-ESIMS: *m/z* = 203.0815 (calcd. for C<sub>11</sub>H<sub>10</sub>N<sub>2</sub>O<sub>2</sub>, 203.0821).

### 8-Chloro-3a,4-dihydrochromeno[3,4-*c*]pyrrole-1,3(2*H*,9*bH*)-dione **5m** (Table 1, Entry 1).

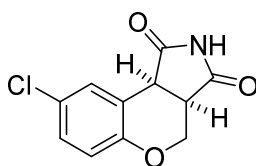

Maleimide (366 mg, 3.75 mmol) and 4-chlorophenoxyacetic acid (140 mg, 0.75 mmol) were dissolved in 13 mL CH<sub>3</sub>CN and 7 mL H<sub>2</sub>O and irradiated through pyrex for 18 hours. Following irradiation the

reaction mixture was concentrated under reduced pressure.  $^1\text{H}$  NMR analysis revealed peaks that could be attributed to the desired product **5m** (0.025 mmol; 3%).

### Attempted Synthesis of **9**

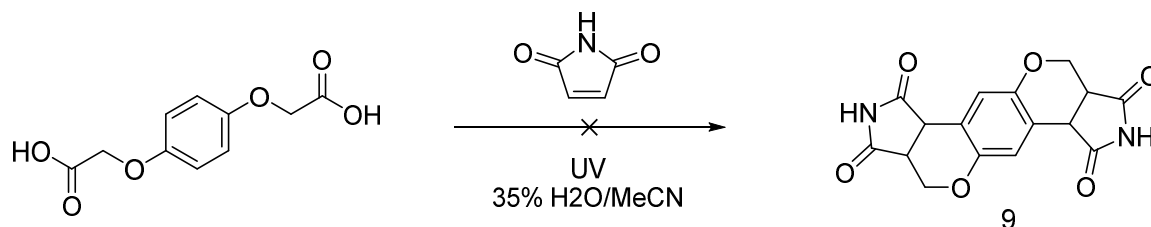

Maleimide (732 mg, 7.5 mmol) and hydroquinone-O,O'-diacetic acid (169.7 mg, 0.75 mmol) were dissolved in 26 mL CH<sub>3</sub>CN and 7 mL H<sub>2</sub>O and irradiated through pyrex for 18 hours. Following irradiation the reaction mixture was concentrated under reduced pressure.  $^1\text{H}$  NMR and GC-MS analyses revealed that the desired product **9** had not been formed.

## X-ray Crystallography

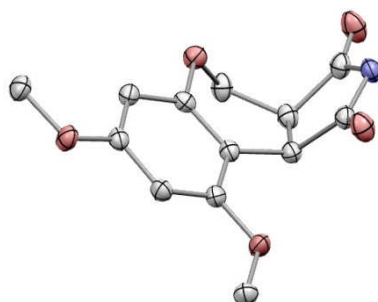

**Fig. S1.** The X-ray crystal structure of **5g**.

**Table S1.** Crystal data & structure refinement for **5g**.

|                                      |                                                                                                                   |
|--------------------------------------|-------------------------------------------------------------------------------------------------------------------|
| Identification code                  | <b>5g</b>                                                                                                         |
| CCDC code                            | 962517                                                                                                            |
| Empirical Formula                    | $C_{13}H_{13}NO_5$                                                                                                |
| Formula Weight                       | 263.25                                                                                                            |
| Crystal Colour, Habit                | colourless prism                                                                                                  |
| Crystal Dimensions                   | 0.200 mm x 0.100 mm x 0.030 mm                                                                                    |
| Crystal System                       | monoclinic                                                                                                        |
| Lattice Type                         | Primitive                                                                                                         |
| Lattice Parameters                   | $a = 7.925(4) \text{ \AA}$ $\beta = 92.336(8)^\circ$<br>$b = 8.466(3) \text{ \AA}$<br>$c = 17.187(6) \text{ \AA}$ |
| Volume                               | $1152.2(8) \text{ \AA}^3$                                                                                         |
| Space Group                          | $P2_1/n(\#14)$                                                                                                    |
| Z value                              | 4                                                                                                                 |
| Density (calculated)                 | 1.517 g/mL                                                                                                        |
| F(000)                               | 552.00                                                                                                            |
| $\mu(\text{CuK}\alpha)$              | $9.993 \text{ cm}^{-1}$                                                                                           |
| Diffractometer                       | Saturn70                                                                                                          |
| Radiation Voltage                    | $\text{CuK}\alpha (\lambda = 1.54187 \text{ \AA})$                                                                |
| Current Temperature                  | 173 K                                                                                                             |
| Detector Aperture                    | 70 x 70 mm                                                                                                        |
| Pixel Size                           | 0.034 mm                                                                                                          |
| $2\theta_{\text{max}}$               | $136.7^\circ$                                                                                                     |
| No. of Reflections Measured          | Total: 15,295, Unique: 2084 ( $R_{\text{int}} = 0.0431$ )                                                         |
| Corrections                          | Lorentz-polarization                                                                                              |
| Structure Solution                   | Direct Methods                                                                                                    |
| Refinement                           | Full-matrix least-squares on $F^2$                                                                                |
| Function Minimized                   | $\sum w (F_o^2 - F_c^2)^2$                                                                                        |
| Least Squares Weights                | $w = 1/[\sigma^2(F_o^2) + (0.1051P)^2 + 2.9953P]$<br>where $P = (\text{Max}(F_o^2, 0) + 2F_c^2)/3$                |
| $2\theta_{\text{max}}$ cutoff        | $136.7^\circ$                                                                                                     |
| Anomalous Dispersion                 | All non-hydrogen atoms                                                                                            |
| No. Observations                     | (All reflections) 2084                                                                                            |
| No. Variables                        | 176                                                                                                               |
| Reflection/Parameter Ratio           | 11.9                                                                                                              |
| Residuals: $R_1 (I > 2.00\sigma(I))$ | 0.0361                                                                                                            |
| Residuals: $R$ (All reflections)     | 0.0389                                                                                                            |

|                                          |                          |
|------------------------------------------|--------------------------|
| Residuals: wR2 (All reflections)         | 0.1115                   |
| Goodness of Fit                          | 0.956                    |
| Indicator Max Shift/Error in Final Cycle | 0.000                    |
| Maximum peak in Final Diff. Map          | 0.22 e / Å <sup>3</sup>  |
| Minimum peak in Final Diff. Map          | -0.20 e / Å <sup>3</sup> |

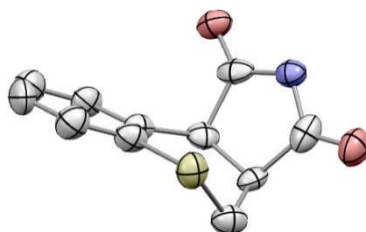

**Fig. S2.** The X-ray crystal structure of **5i**.

**Table S2.** Crystal data & structure refinement for **5i**.

|                             |                                                                                                                                     |
|-----------------------------|-------------------------------------------------------------------------------------------------------------------------------------|
| Identification code         | <b>5i</b>                                                                                                                           |
| CCDC code                   | 962518                                                                                                                              |
| Empirical Formula           | C <sub>11</sub> H <sub>9</sub> NO <sub>2</sub> S                                                                                    |
| Formula Weight              | 219.26                                                                                                                              |
| Crystal Colour, Habit       | colourless prism                                                                                                                    |
| Crystal Dimensions          | 0.100 mm x 0.060 mm x 0.030 mm                                                                                                      |
| Crystal System              | monoclinic                                                                                                                          |
| Lattice Type                | C-centered                                                                                                                          |
| Lattice Parameters          | $a = 12.590(7) \text{ \AA}$ $\beta = 96.690(12)^\circ$<br>$b = 11.384(5) \text{ \AA}$<br>$c = 27.890(13) \text{ \AA}$               |
| Volume                      | 3970(3) Å <sup>3</sup>                                                                                                              |
| Space Group                 | Cc(#9)                                                                                                                              |
| Z value                     | 16                                                                                                                                  |
| Density (calculated)        | 1.467 g/mL                                                                                                                          |
| F(000)                      | 1824.00                                                                                                                             |
| $\mu(\text{CuK}\alpha)$     | 3.016 cm <sup>-1</sup>                                                                                                              |
| Diffractometer              | Mercury70                                                                                                                           |
| Radiation Voltage           | MoK $\alpha$ ( $\lambda = 0.71075$ )                                                                                                |
| Current Temperature         | 93 K                                                                                                                                |
| Detector Aperture           | 70 x 70 mm                                                                                                                          |
| Pixel Size                  | 0.068 mm                                                                                                                            |
| 2 $\theta$ max              | 50.8°                                                                                                                               |
| No. of Reflections Measured | Total: 10656, Unique: 5199 ( $R_{\text{int}} = 0.0744$ )                                                                            |
| Corrections                 | Lorentz-polarization                                                                                                                |
| Structure Solution          | Charge Flipping (Superflip)                                                                                                         |
| Refinement                  | Full-matrix least-squares on F <sup>2</sup>                                                                                         |
| Function Minimized          | $\Sigma w (\text{Fo}^2 - \text{Fc}^2)^2$                                                                                            |
| Least Squares Weights       | $w = 1/[\sigma^2(\text{Fo}^2) + (0.1051\text{P})^2 + 2.9953\text{P}]$<br>where P = (Max(Fo <sup>2</sup> , 0) + 2Fc <sup>2</sup> )/3 |
| 2 $\theta$ max cutoff       | 50.8°                                                                                                                               |
| Anomalous Dispersion        | All non-hydrogen atoms                                                                                                              |
| No. Observations            | (All reflections) 5199                                                                                                              |
| No. Variables               | 557                                                                                                                                 |

|                                          |                          |
|------------------------------------------|--------------------------|
| Reflection/Parameter Ratio               | 9.33                     |
| Residuals: R1 ( $I > 2.00\sigma(I)$ )    | 0.0738                   |
| Residuals: R (All reflections)           | 0.0979                   |
| Residuals: wR2 (All reflections)         | 0.1927                   |
| Goodness of Fit                          | 1.073                    |
| Indicator Max Shift/Error in Final Cycle | 0.000                    |
| Maximum peak in Final Diff. Map          | 0.52 e / Å <sup>3</sup>  |
| Minimum peak in Final Diff. Map          | -0.43 e / Å <sup>3</sup> |

**Table S3.** Coupling Constant between Protons at Ring Junction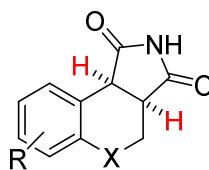

| Entry | Product       | $^3J_{\text{H-H}}$ (Hz) |
|-------|---------------|-------------------------|
| 1     | <b>4a</b><br> | -                       |
| 2     | <b>4b</b><br> | 9.2                     |
| 3     | <b>4c</b><br> | 9.2                     |
| 4     | <b>4d</b><br> | 9.4                     |
| 5     | <b>4e</b><br> | 9.2 ; 9.7 <sup>a</sup>  |
| 6     | <b>4f</b><br> | 9.2                     |
| 7     | <b>4g</b><br> | 9.7                     |
| 8     | <b>4h</b><br> | 9.7                     |
| 9     | <b>4i</b><br> | 9.5                     |
| 10    | <b>4j</b><br> | 9.4                     |
| 11    | <b>4k</b><br> | 9.3                     |
| 12    | <b>4l</b><br> | 9.3                     |

<sup>a</sup> 7-methoxy and 9-methoxy regioisomers respectively.

## In-situ NMR Monitoring

A 5 mL stock solution of 37.5 mM of the acid **4** and 187.5 mM of maleimide **1a** was prepared in a 65 : 35 mixture of CD<sub>3</sub>CN and D<sub>2</sub>O. The solution was purged with argon for 5 minutes before transferring 1 mL to an NMR tube. The tube was irradiated using a 12 x 8 W BLB photoreactor ( $\lambda_{\text{max}} = 365 \text{ nm}$ ).

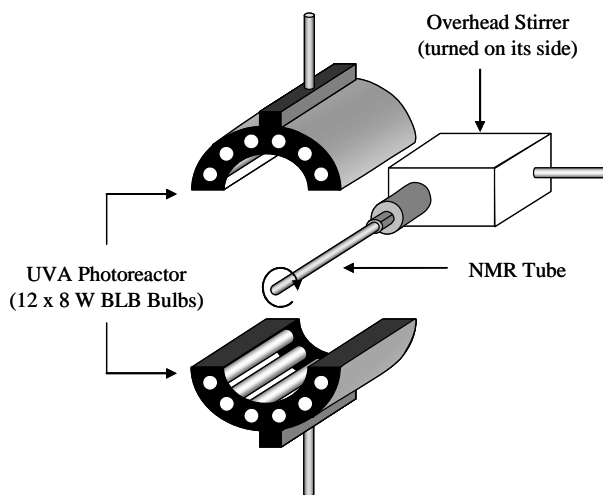

**Figure S3.** Irradiation setup for in-situ NMR monitoring.

Data for each reaction studied is provided below.

Reaction of phenoxyacetic acid **4a** and maleimide **1a** (Table 2, Entry 1).

| Time (min) | [ <b>4a</b> ] (mM) | [ <b>1a</b> ] (mM) | [ <b>5a</b> ] (mM) | [ <b>7</b> ] (mM) |
|------------|--------------------|--------------------|--------------------|-------------------|
| 0          | 37.50              | 187.50             | 0.00               | 0.00              |
| 10         | 35.65              | 171.17             | 0.14               | 0.00              |
| 30         | 33.02              | 157.75             | 0.21               | 0.01              |
| 60         | 29.43              | 139.37             | 0.51               | 0.03              |
| 120        | 22.97              | 107.69             | 0.86               | 0.05              |
| 180        | 17.91              | 84.31              | 1.74               | 0.13              |
| 240        | 14.38              | 69.29              | 1.85               | 0.10              |
| 300        | 10.73              | 54.02              | 1.97               | 0.24              |
| 420        | 7.62               | 40.13              | 2.45               | 0.30              |
| 540        | 4.56               | 26.11              | 2.33               | 0.44              |

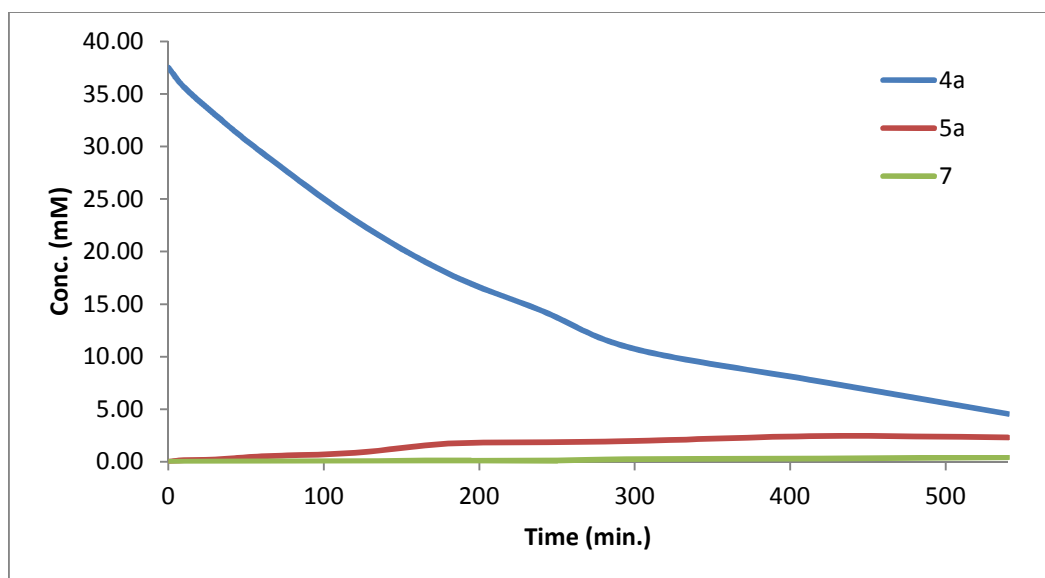

Figure S4. Reaction profile for **4a**



Reaction of 4-methylphenoxyacetic acid **4b** and maleimide **1a** (Table 2, Entry 2).

| Time (min) | [ <b>4b</b> ] (mM) | [ <b>1a</b> ] (mM) | [ <b>5b</b> ] (mM) | [ <b>7</b> ] (mM) |
|------------|--------------------|--------------------|--------------------|-------------------|
| 0          | 37.50              | 187.50             | 0.00               | 0.00              |
| 10         | 32.45              | 126.83             | 1.12               | 0.61              |
| 20         | 26.93              | 115.05             | 3.31               | 1.44              |
| 40         | 18.27              | 83.96              | 5.19               | 2.12              |
| 60         | 12.70              | 67.49              | 7.28               | 2.80              |
| 90         | 8.71               | 63.70              | 11.56              | 4.31              |
| 120        | 4.76               | 43.47              | 12.05              | 4.61              |
| 150        | 1.94               | 41.87              | 15.53              | 6.38              |
| 180        | 0.71               | 31.62              | 14.61              | 5.41              |
| 240        | 0.91               | 27.27              | 12.18              | 6.49              |

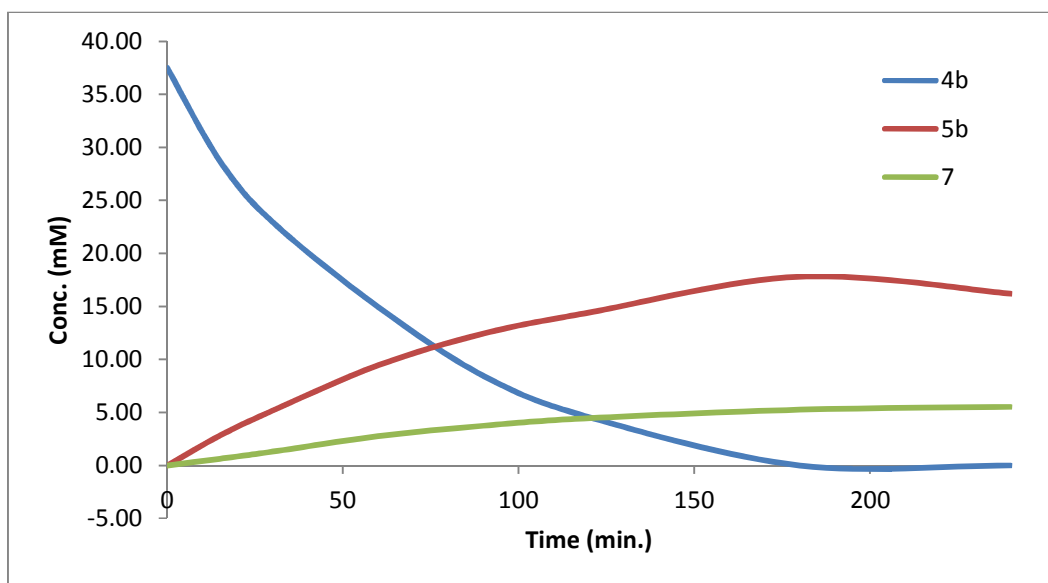

Figure S5. Reaction profile for **4b**

Reaction of 4-t-butylphenoxyacetic acid **4c** and maleimide **1a** (Table 2, Entry 3)

| Time (min) | [ <b>4c</b> ] (mM) | [ <b>1a</b> ] (mM) | [ <b>5c</b> ] (mM) | [ <b>7</b> ] (mM) |
|------------|--------------------|--------------------|--------------------|-------------------|
| 0          | 37.50              | 187.50             | 0.00               | 0.00              |
| 10         | 33.79              | 144.36             | 1.50               | 0.40              |
| 30         | 26.82              | 98.87              | 4.52               | 1.28              |
| 60         | 19.15              | 54.63              | 8.01               | 2.40              |
| 120        | 9.32               | 15.53              | 12.09              | 4.00              |
| 180        | 5.80               | 5.61               | 14.14              | 4.50              |
| 240        | 4.06               | 2.68               | 14.81              | 4.69              |
| 300        | 2.76               | 2.17               | 14.68              | 4.82              |
| 420        | 1.82               | 1.34               | 14.74              | 4.74              |
| 540        | 0.12               | 2.98               | 17.27              | 5.00              |

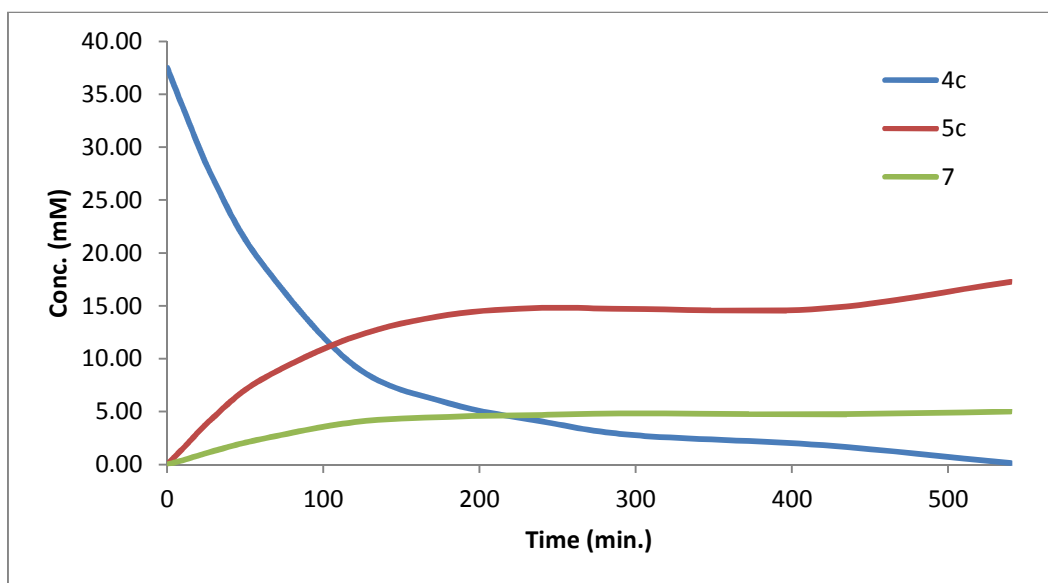

Figure S6. Reaction profile for **4c**

Reaction of 4-methoxyphenoxyacetic acid **4d** and maleimide **1a** (Table 2, Entry 4).

| Time (min) | [ <b>4d</b> ] (mM) | [ <b>1a</b> ] (mM) | [ <b>5d</b> ] (mM) | [ <b>7</b> ] (mM) |
|------------|--------------------|--------------------|--------------------|-------------------|
| 0          | 37.50              | 187.50             | 0.00               | 0.00              |
| 10         | 33.42              | 122.23             | 1.94               | 0.47              |
| 20         | 26.17              | 93.80              | 3.87               | 0.96              |
| 40         | 20.15              | 74.21              | 6.64               | 1.72              |
| 60         | 15.72              | 58.60              | 9.31               | 2.41              |
| 90         | 11.33              | 42.21              | 12.18              | 3.03              |
| 120        | 8.17               | 32.04              | 14.35              | 3.80              |
| 150        | 5.96               | 26.34              | 15.60              | 3.95              |
| 180        | 4.85               | 23.36              | 18.84              | 5.26              |
| 240        | 0.00               | 14.13              | 22.06              | 5.14              |
| 300        | 0.03               | 11.75              | 20.89              | 5.31              |

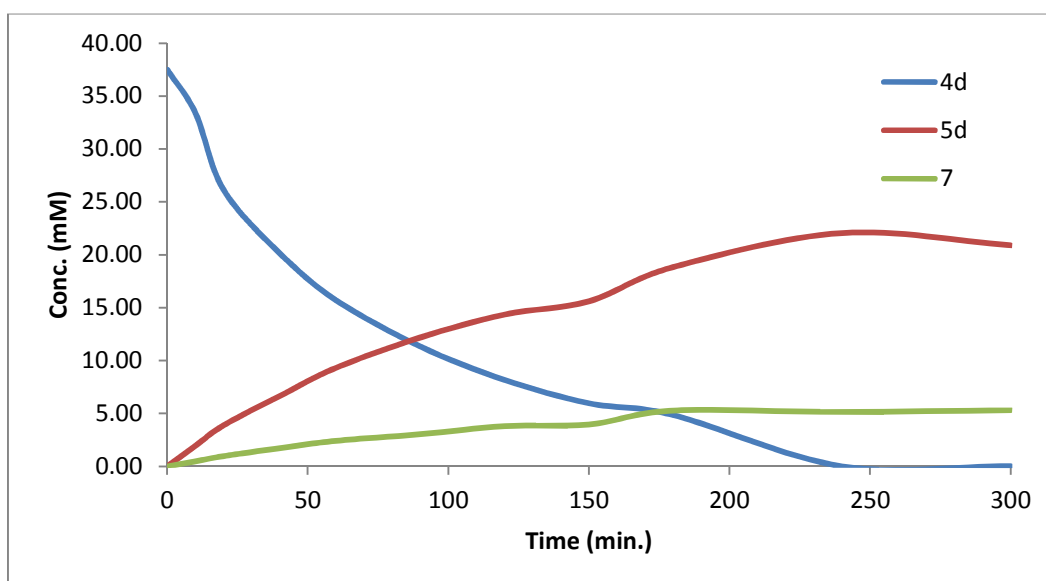

Figure S7. Reaction profile for **4d**

Reaction of 3-methoxyphenoxyacetic acid **4e** and maleimide **1a** (Table 2, Entry 5).

| Time (min) | [ <b>4e</b> ] (mM) | [ <b>1a</b> ] (mM) | [ <b>5e</b> ] (mM) | [ <b>5e'</b> ] (mM) | [ <b>7</b> ] (mM) |
|------------|--------------------|--------------------|--------------------|---------------------|-------------------|
| 0          | 37.50              | 187.50             | 0.00               | 0.00                | 0.00              |
| 15         | 32.13              | 119.52             | 3.40               | 1.37                | 0.60              |
| 30         | 27.03              | 106.46             | 6.38               | 2.11                | 1.13              |
| 60         | 18.80              | 96.69              | 12.45              | 3.68                | 2.31              |
| 90         | 12.13              | 75.00              | 17.57              | 4.05                | 3.40              |
| 120        | 6.39               | 48.31              | 22.08              | 4.78                | 4.32              |
| 180        | -0.15              | 35.31              | 28.33              | 6.76                | 5.92              |
| 240        | 0.04               | 37.91              | 28.42              | 5.34                | 6.18              |

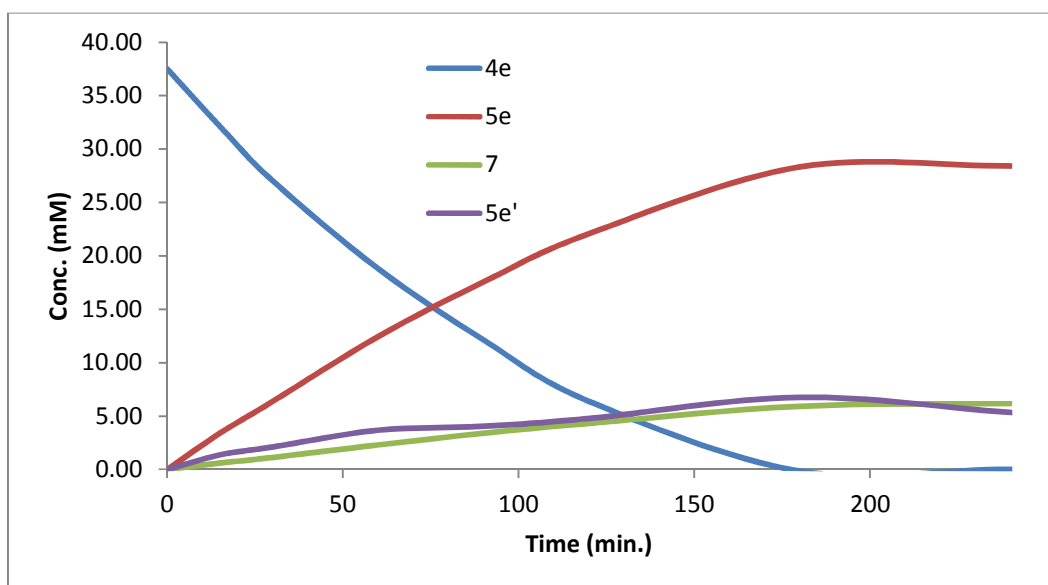

Figure S8. Reaction profile for **4e**

Reaction of 2-methoxyphenoxyacetic acid **4f** and maleimide **1a** (Table 2, Entry 6).

| Time (min) | [ <b>4f</b> ] (mM) | [ <b>1a</b> ] (mM) | [ <b>5f</b> ] (mM) | [ <b>7</b> ] (mM) |
|------------|--------------------|--------------------|--------------------|-------------------|
| 0          | 37.50              | 187.50             | 0.00               | 0.00              |
| 15         | 25.86              | 118.09             | 6.05               | 0.37              |
| 30         | 20.90              | 84.36              | 10.60              | 0.66              |
| 60         | 12.12              | 45.82              | 16.26              | 0.99              |
| 120        | 5.17               | 19.51              | 20.15              | 1.14              |
| 180        | 2.12               | 8.58               | 18.93              | 1.43              |
| 240        | 0.67               | 4.58               | 20.17              | 1.64              |

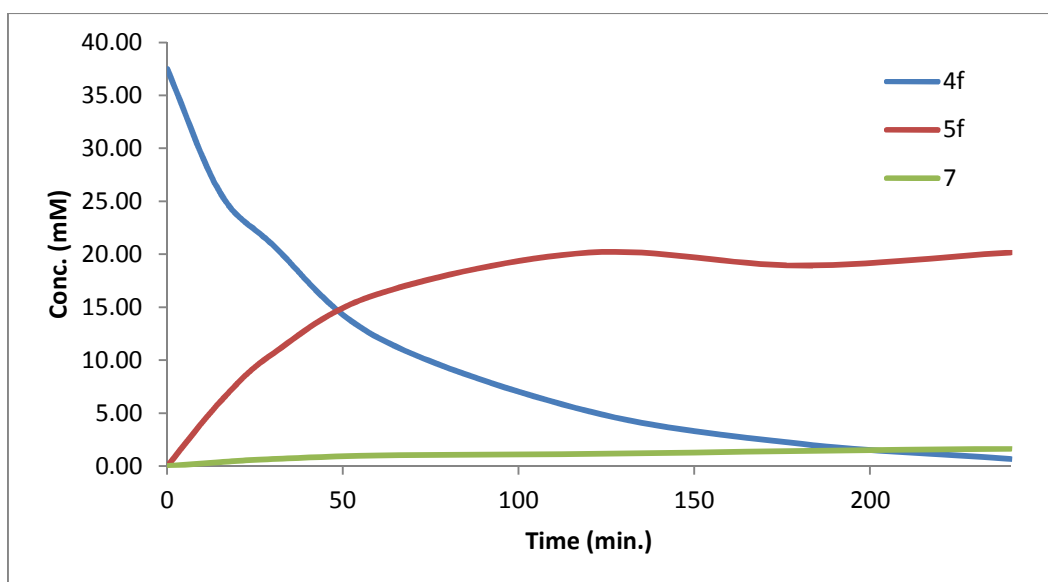

Figure S9. Reaction profile for **4f**

Reaction of 3,5-dimethoxyphenoxyacetic acid **4g** and maleimide **1a** (Table 2, Entry 7).

| Time (min) | [ <b>4g</b> ] (mM) | [ <b>1a</b> ] (mM) | [ <b>5g</b> ] (mM) | [ <b>7</b> ] (mM) |
|------------|--------------------|--------------------|--------------------|-------------------|
| 0          | 37.50              | 187.50             | 0.00               | 0.00              |
| 10         | 34.59              | 166.71             | 3.15               | 0.37              |
| 30         | 28.57              | 143.33             | 8.26               | 1.07              |
| 60         | 21.60              | 114.31             | 15.56              | 2.08              |
| 120        | 9.68               | 75.93              | 26.83              | 3.69              |
| 180        | 2.25               | 54.30              | 34.99              | 4.98              |
| 240        | 0.28               | 42.99              | 36.92              | 5.11              |
| 0          | 37.50              | 187.50             | 0.00               | 0.00              |

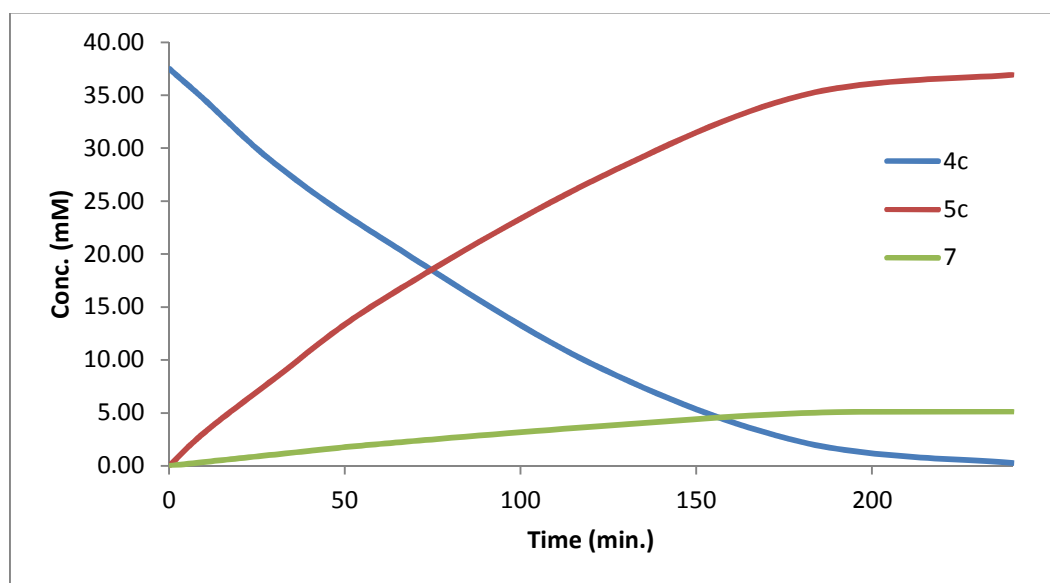

Figure S10. Reaction profile for **4g**

**Reaction of 3,4,5-trimethoxyphenoxyacetic acid 4h and maleimide 1a (Table 2, Entry 8).**

No reaction observed over 240 minutes.

Reaction of phenylthioacetic acid **4i** and maleimide **1a** (Table 2, Entry 9).

| Time (min) | [ <b>4i</b> ] (mM) | [ <b>1a</b> ] (mM) | [ <b>5i</b> ] (mM) | [ <b>7</b> ] (mM) |
|------------|--------------------|--------------------|--------------------|-------------------|
| 0          | 37.50              | 187.50             | 0.00               | 0.00              |
| 10         | 32.45              | 126.83             | 1.12               | 0.61              |
| 20         | 26.93              | 115.05             | 3.31               | 1.44              |
| 40         | 18.27              | 83.96              | 5.19               | 2.12              |
| 60         | 12.70              | 67.49              | 7.28               | 2.80              |
| 90         | 8.71               | 63.70              | 11.56              | 4.31              |
| 120        | 4.76               | 43.47              | 12.05              | 4.61              |
| 150        | 1.94               | 41.87              | 15.53              | 6.38              |
| 180        | 0.71               | 31.62              | 14.61              | 5.41              |
| 240        | 0.91               | 27.27              | 12.18              | 6.49              |

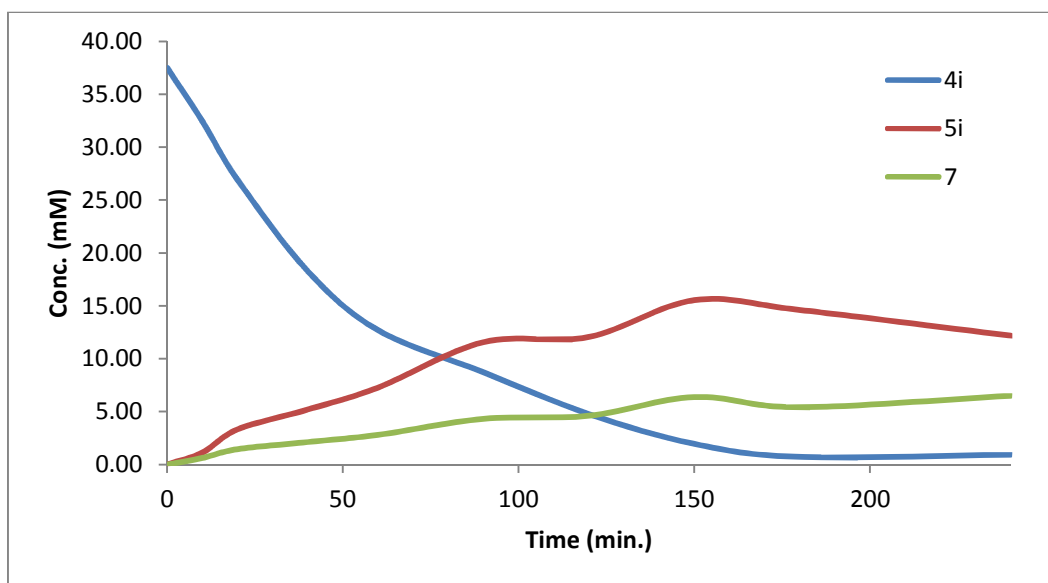

Figure S11. Reaction profile for **4i**



Reaction of 4-methoxyphenylthioacetic acid **4j** and maleimide **1a** (Table 2, Entry 11).

| Time (min) | [ <b>4j</b> ] (mM) | [ <b>1a</b> ] (mM) | [ <b>5j</b> ] (mM) | [ <b>7</b> ] (mM) |
|------------|--------------------|--------------------|--------------------|-------------------|
| 0          | 37.50              | 187.50             | 0.00               | 0.00              |
| 2          | 35.50              | 125.46             | 1.29               | 0.20              |
| 20         | 33.37              | 120.12             | 2.48               | 0.75              |
| 40         | 29.49              | 102.46             | 4.28               | 1.31              |
| 60         | 26.72              | 91.34              | 5.90               | 1.77              |
| 120        | 19.78              | 64.97              | 9.64               | 2.56              |
| 180        | 14.07              | 45.96              | 10.30              | 3.04              |
| 240        | 11.21              | 38.60              | 13.67              | 3.89              |
| 300        | 8.86               | 33.09              | 14.76              | 4.01              |
| 420        | 8.27               | 29.34              | 14.93              | 4.45              |
| 540        | 7.30               | 26.86              | 14.46              | 4.37              |

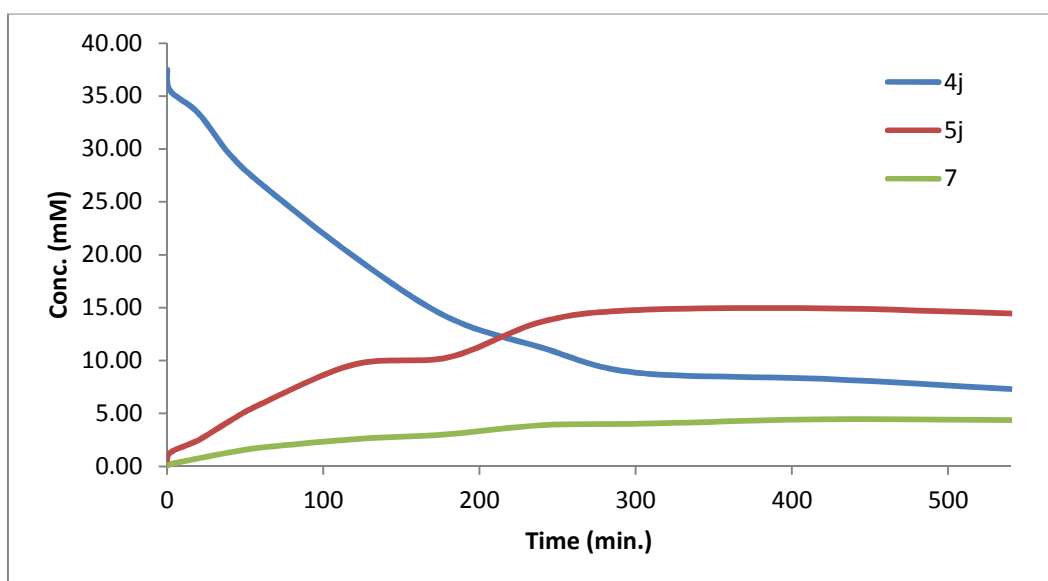

Figure S12. Reaction profile for **4j**

Reaction of 4-methylsulfanylphenoxyacetic acid 4k and maleimide 1a (Table 2, Entry 12).

| Time (min) | [4k] (mM) | [1a] (mM) | [5k] (mM) | [7] (mM) |
|------------|-----------|-----------|-----------|----------|
| 0          | 37.50     | 187.50    | 0.38      | 0.00     |
| 20         | 34.67     | 172.21    | 1.02      | 0.23     |
| 40         | 33.09     | 158.72    | 1.89      | 0.36     |
| 60         | 30.56     | 144.93    | 1.77      | 0.29     |
| 120        | 28.71     | 126.51    | 2.98      | 0.45     |
| 180        | 27.71     | 112.92    | 4.04      | 0.77     |
| 240        | 24.93     | 98.48     | 3.76      | 0.57     |
| 300        | 24.55     | 89.15     | 4.81      | 0.79     |
| 420        | 22.71     | 70.93     | 5.57      | 0.89     |
| 540        | 22.04     | 61.85     | 6.71      | 1.19     |

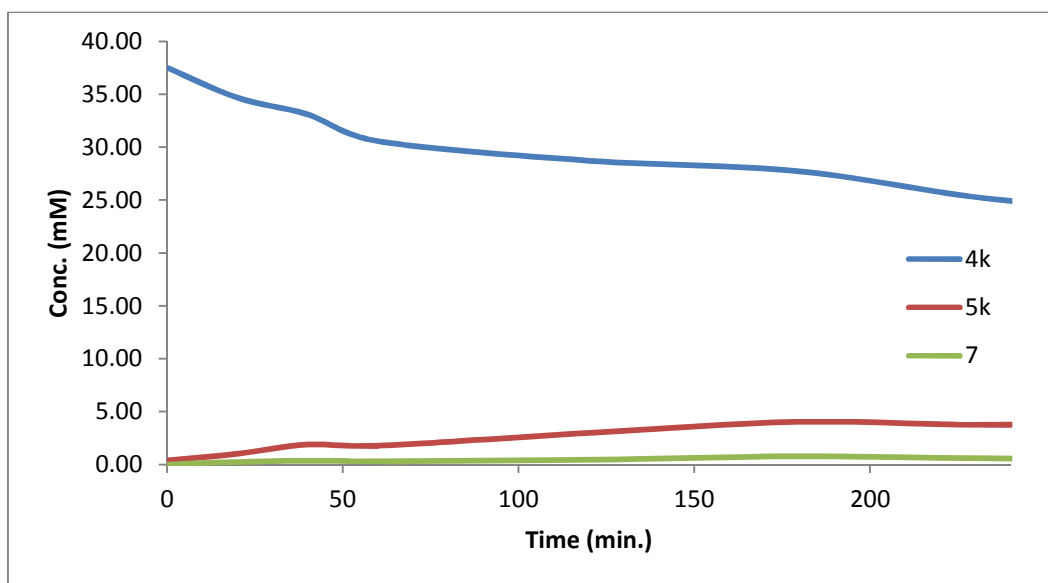

Figure S13. Reaction profile for 4k

Reaction of *N*-phenyl glycine acid **4l** and maleimide **1a** (Table 2, Entry 13).

| Time (min) | [4k] (mM) | [1a] (mM) | [5k] (mM) | [7] (mM) |
|------------|-----------|-----------|-----------|----------|
| 0          | 37.50     | 187.50    | 0.06      | 0.01     |
| 5          | 36.05     | 149.88    | 2.40      | 0.35     |
| 10         | 33.63     | 151.14    | 4.84      | 0.72     |
| 20         | 26.22     | 132.95    | 9.56      | 1.53     |
| 40         | 21.22     | 109.57    | 17.70     | 2.73     |
| 60         | 12.55     | 90.02     | 25.85     | 4.14     |
| 90         | 1.23      | 68.00     | 35.97     | 5.93     |
| 120        | 2.89      | 69.55     | 34.46     | 6.42     |

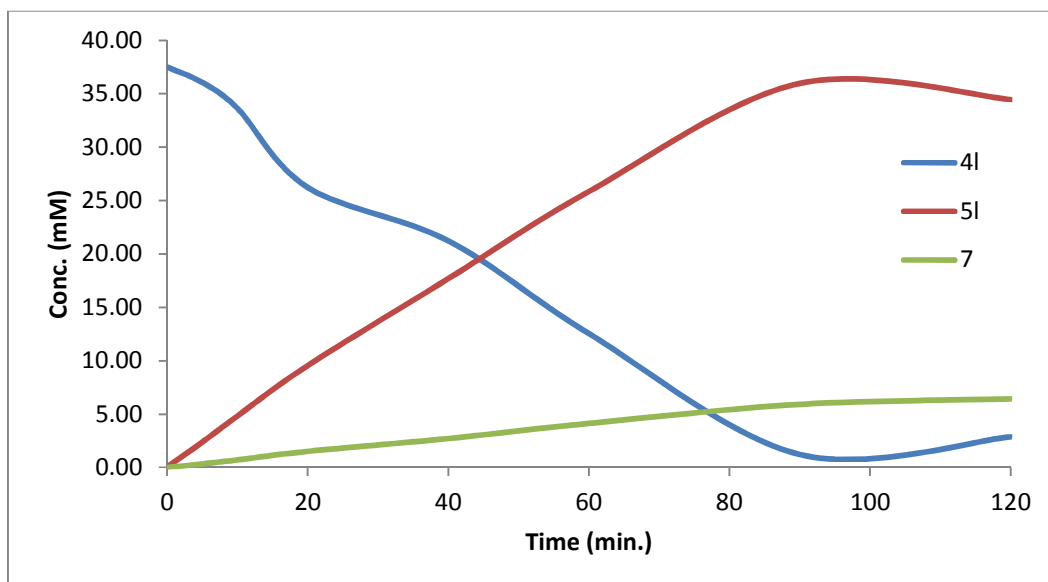

Figure S14. Reaction profile for **4l**

**Figure S15.** Profile showing Lamp Output and Pyrex Absorbance

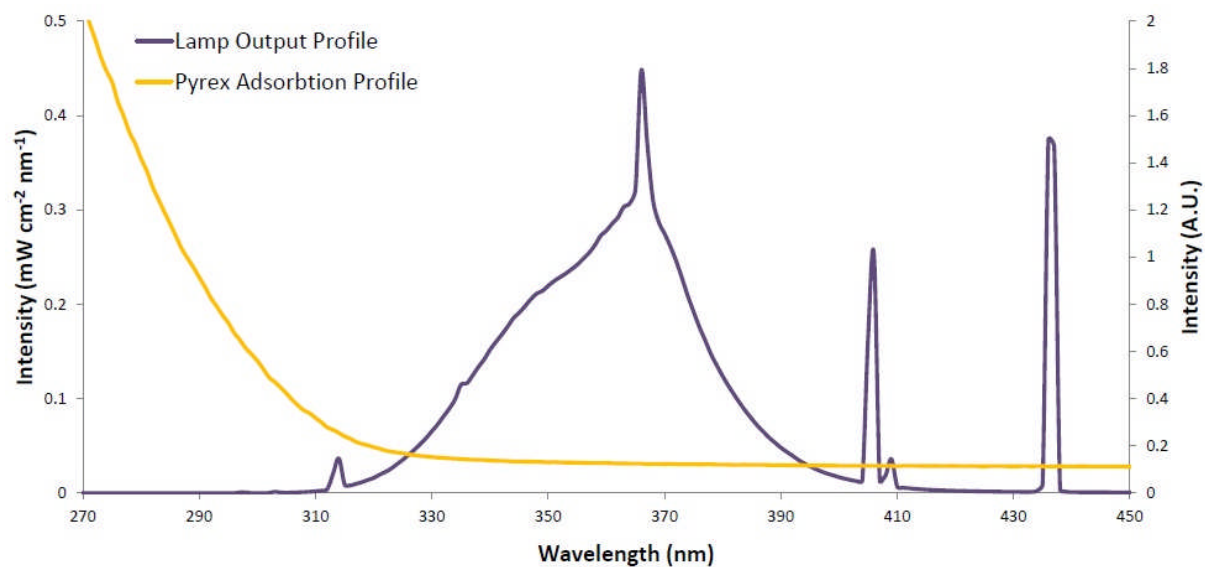

**Figure S16.** Profile showing scale expansion of absorbance of maleimide **1a**

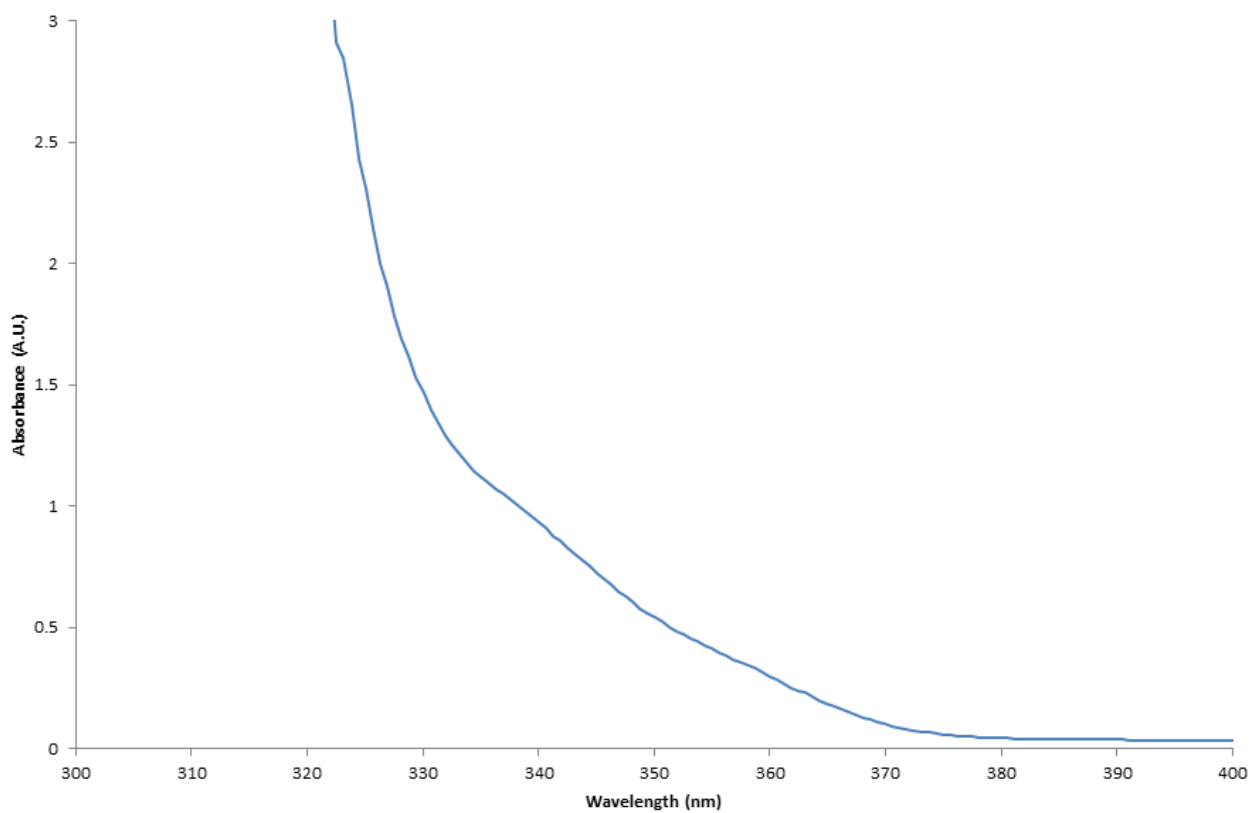

**Figure S17.** Profile showing absorbances of acids **4b-l**

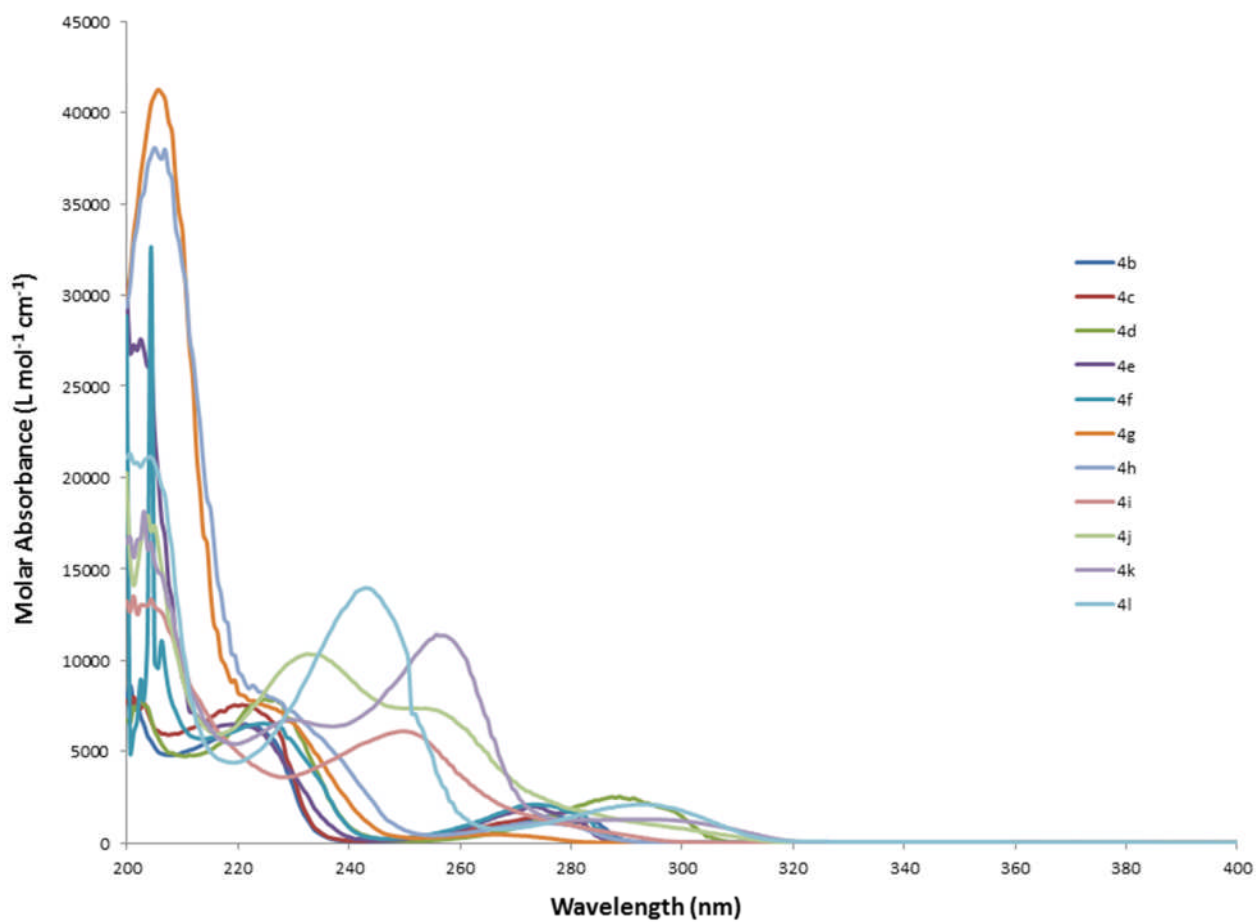

## EPR Spectroscopy

EPR spectra were obtained at 9.5 GHz with 100 kHz modulation employing a Bruker EMX 10/12 spectrometer fitted with a rectangular ER4122 SP resonant cavity. Stock solutions of each acid (10 to 50 mg) in benzene or *tert*-butylbenzene (0.5 mL) were prepared and sonicated if necessary. An aliquot (0.2 mL), to which any additional reactant had been added, was placed in a 5 mm o.d. quartz tube, de-aerated by bubbling nitrogen for 15 min. Photolysis in the resonant cavity was by unfiltered light from a 500 W super pressure mercury arc lamp. In all cases where spectra were obtained, hfs were assigned with the aid of computer simulations using the Bruker SimFonia and NIEHS Winsim2002 software packages. For kinetic measurements, precursor samples were used mainly in 'single shot' experiments, i.e. new samples were prepared for each temperature and each concentration to minimize sample depletion effects. EPR signals were digitally filtered and double integrated using the Bruker WinEPR software and radical concentrations were calculated by reference to the double integral of the signal from a known concentration of the stable radical DPPH [ $1 \times 10^{-3}$  M in PhMe], run under identical conditions. The majority of EPR spectra were recorded with 2.0 mW power, 0.8 G<sub>pp</sub> modulation intensity and gain of *ca.*  $10^6$ .

### Sample EPR spectra of radical cations

**Fig. S18. EPR spectrum on UV photolysis of 1,4-dimethoxybenzene in PhH at 300 K.**

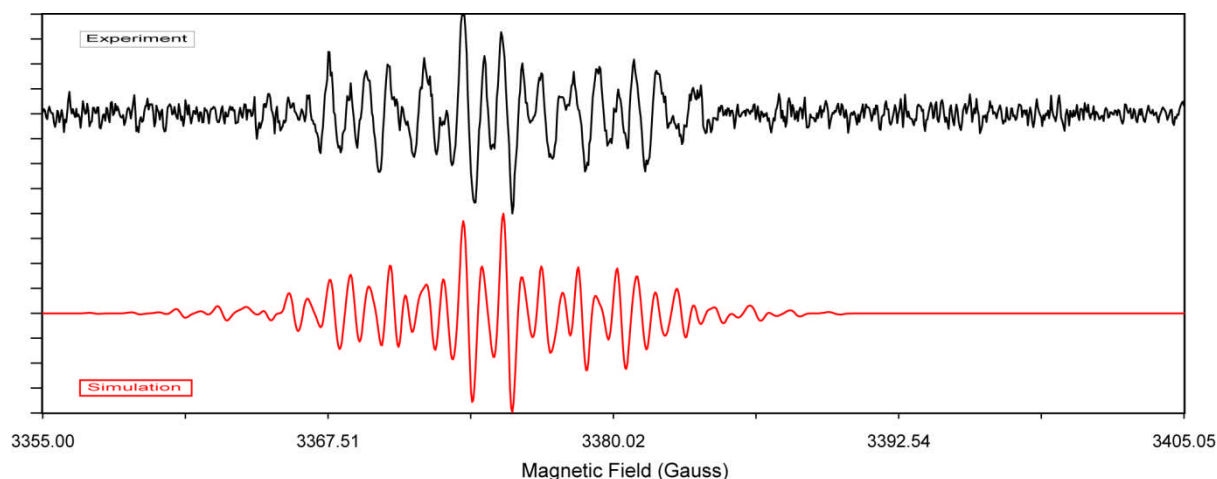

Simulation with two radical cations (*transoid* and *cisoid*): one 30% having hfs/G:  $a(2H) = 1.8$ ,  $a(2H) = 3.0$ ,  $a(2H) = 3.8$  and a second 70% with:  $a(2H) = 1.7$ ,  $a(2H) = 2.7$ ,  $a(2H) = 3.3$  G.

**Figure S19. EPR spectrum obtained on UV photolysis of 4-*t*-Bu-phenoxyacetic acid 4c in PhH at 300 K.**

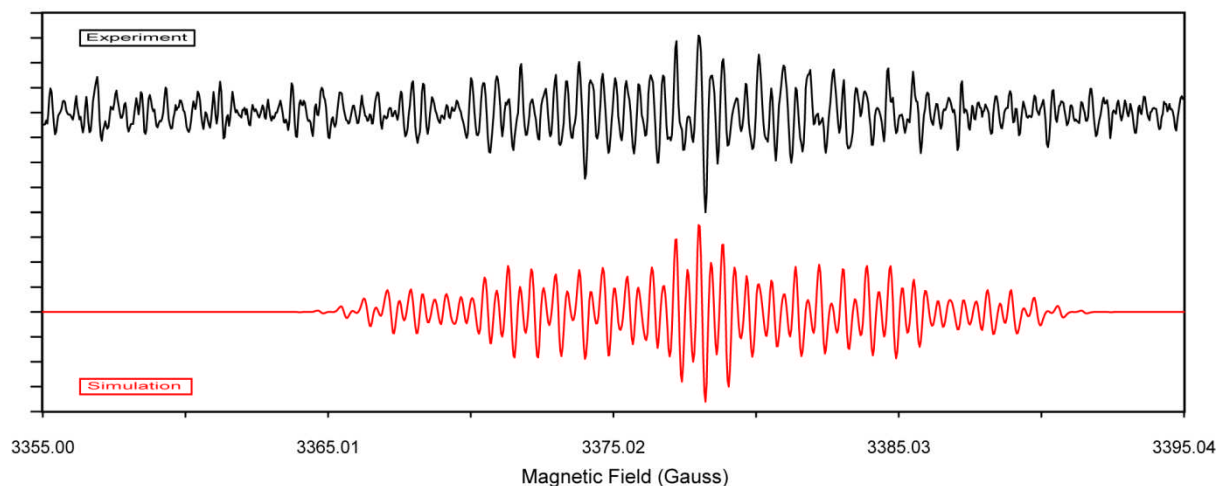

EPR parameters in main text Table 4.

**Figure S20. EPR spectrum obtained on UV photolysis of benzyl (4-methoxyphenoxy)acetate 15 in PhH at 300K.**

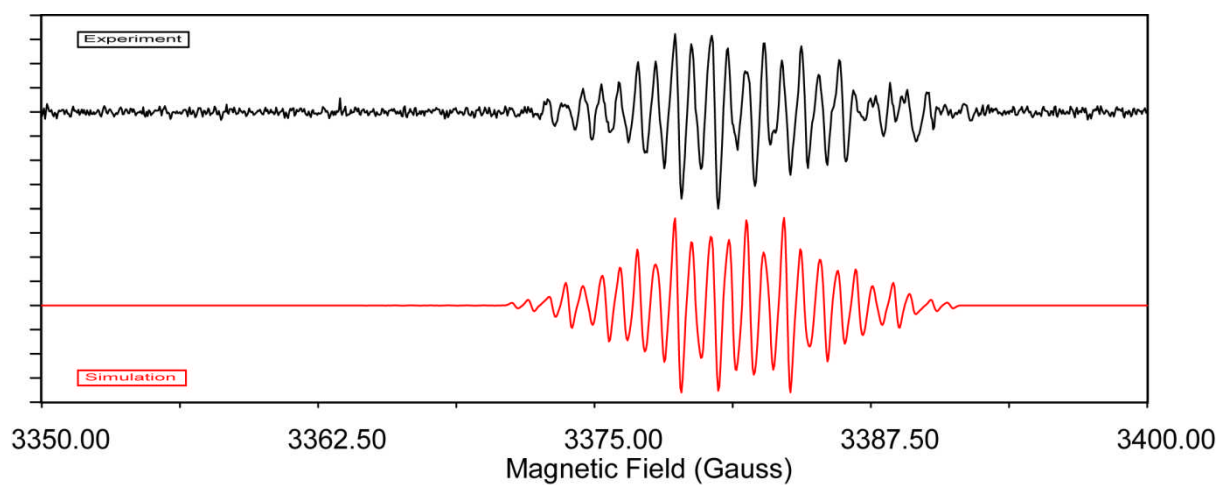

EPR parameters in table 4 of the main text.

**Figure S21. EPR spectrum obtained on UV photolysis of methyl (4-methylthiophenoxy) acetate 15 in PhH at 300K.**

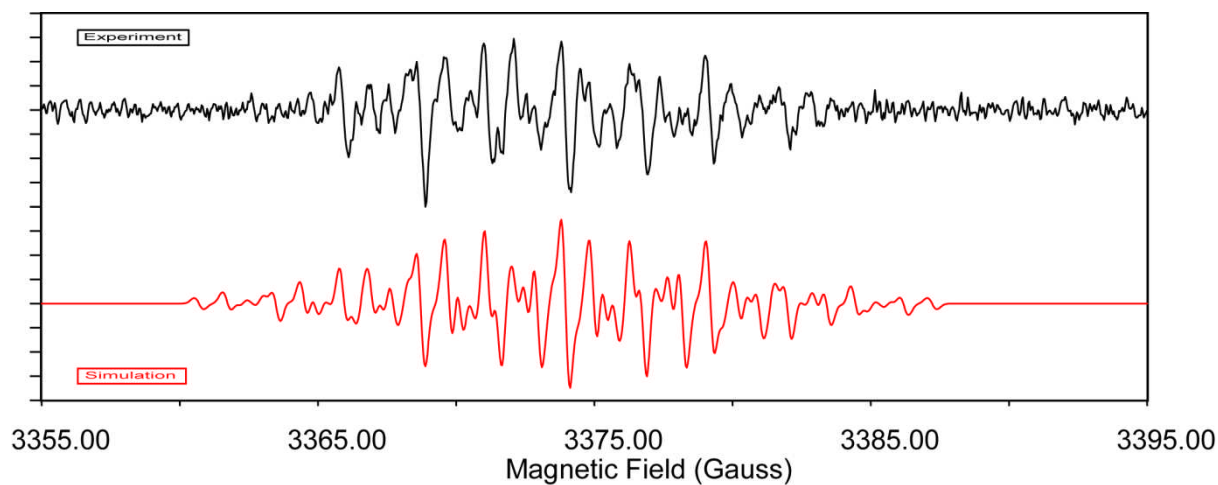

EPR parameters in Table 4 of the main text.

**Figure S22. EPR spectrum obtained on UV photolysis of 3,4,5-trimethoxyphenoxyacetic acid 4h in PhH at 300K.**

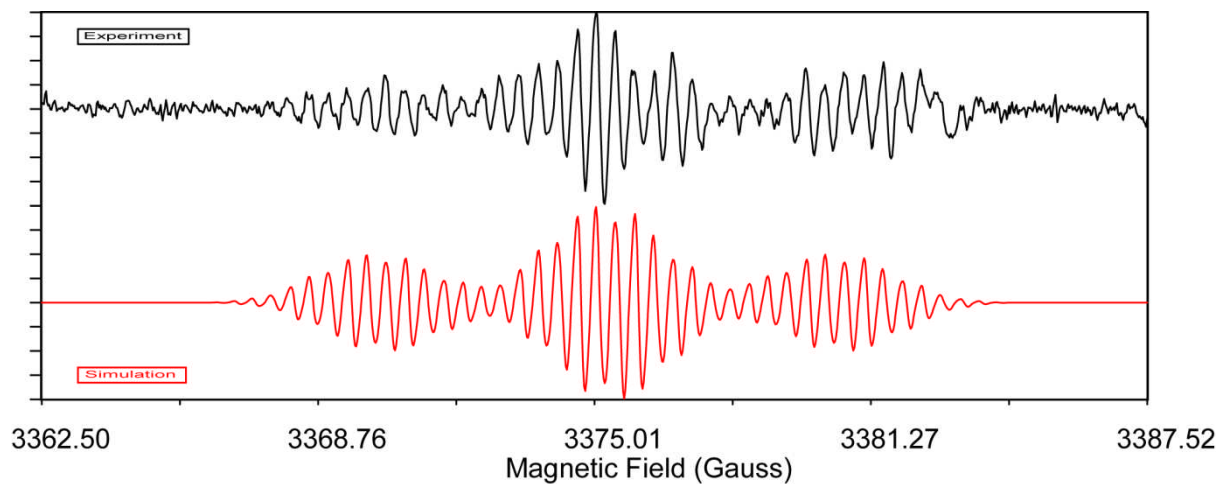

EPR parameters in Table 4 of the main text.



**Figure S23. EPR spectrum obtained on UV photolysis of methyl (3,4,5-trimethoxyphenoxy)acetate 17 in PhH at 300K.**

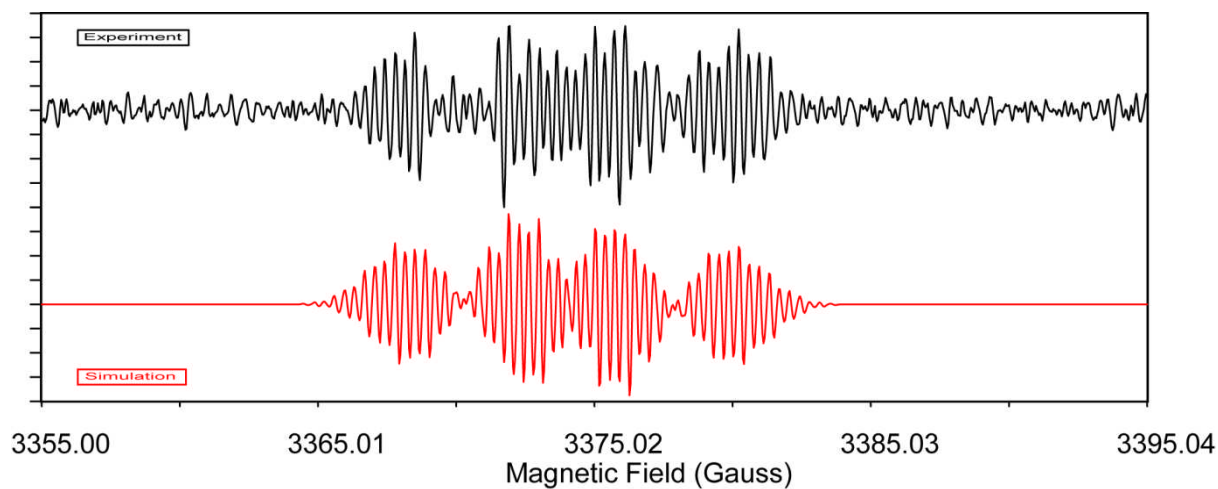

EPR parameters in Table 4 of the main text.

**Figure S24. EPR spectrum obtained on UV photolysis of dibenzyl 2,2'-(1,4-phenylenebis(oxy))diacetate 18 in PhH at 300K.**

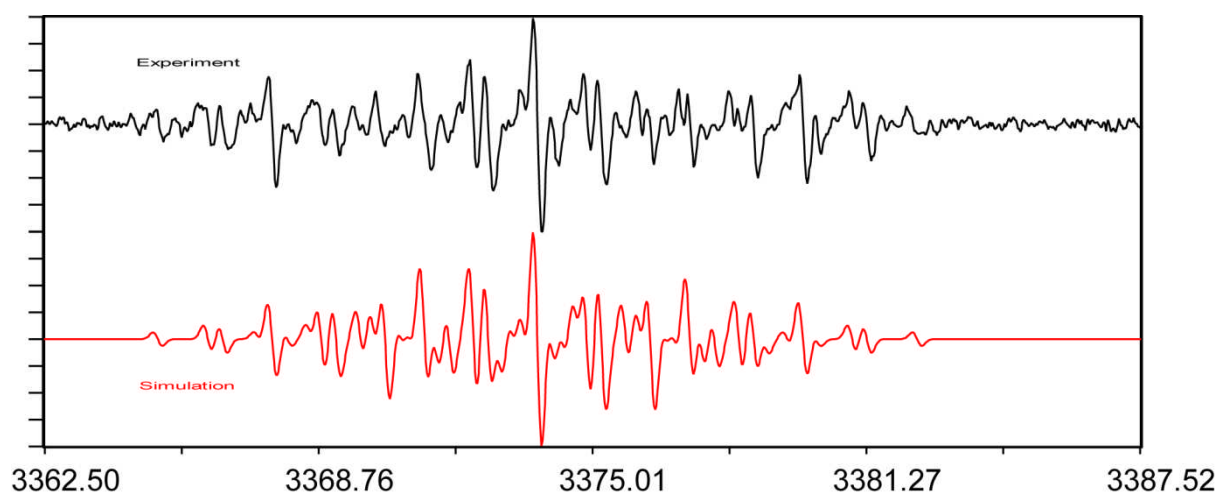

EPR parameters in Table 4 of main text.

**Computational Methods.** The ground-state geometries and energies of the precursor acids and their ions were investigated using the Gaussian 09 program package. The standard UB3LYP functional with the split-valence and with the aug-cc-pvtz basis sets was employed. Geometries were fully optimized with both basis sets without any symmetry constraints for all model compounds. Optimized structures were characterized as minima or saddle points by frequency calculations at the 6-311+G(2d,p) level. The experimental EPR data was all obtained in the non-polar hydrocarbon solvents *tert*-butylbenzene or benzene. Solvent effects, particularly differences in solvation between the neutral reactants and neutral transition states, are therefore expected to be minimal for the EPR work. However, the addition/cyclisation reactions were carried out in acetonitrile/water. In an attempt to model the effect of solvent the CPCM polarizable conductor calculation model was then applied, with acetonitrile as the solvent, and with the aug-cc-pvtz basis set and geometry.

**Gaussian 09, Revision A.02,** M. J. Frisch, G. W. Trucks, H. B. Schlegel, G. E. Scuseria, M. A. Robb, J. R. Cheeseman, G. Scalmani, V. Barone, B. Mennucci, G. A. Petersson, H. Nakatsuji, M. Caricato, X. Li, H. P. Hratchian, A. F. Izmaylov, J. Bloino, G. Zheng, J. L. Sonnenberg, M. Hada, M. Ehara, K. Toyota, R. Fukuda, J. Hasegawa, M. Ishida, T. Nakajima, Y. Honda, O. Kitao, H. Nakai, T. Vreven, J. A. Montgomery, Jr., J. E. Peralta, F. Ogliaro, M. Bearpark, J. J. Heyd, E. Brothers, K. N. Kudin, V. N. Staroverov, R. Kobayashi, J. Normand, K. Raghavachari, A. Rendell, J. C. Burant, S. S. Iyengar, J. Tomasi, M. Cossi, N. Rega, J. M. Millam, M. Klene, J. E. Knox, J. B. Cross, V. Bakken, C. Adamo, J. Jaramillo, R. Gomperts, R. E. Stratmann, O. Yazyev, A. J. Austin, R. Cammi, C. Pomelli, J. W. Ochterski, R. L. Martin, K. Morokuma, V. G. Zakrzewski, G. A. Voth, P. Salvador, J. J. Dannenberg, S. Dapprich, A. D. Daniels, O. Farkas, J. B. Foresman, J. V. Ortiz, J. Cioslowski, and D. J. Fox, Gaussian, Inc., Wallingford CT, 2009.

## DFT Optimised Structures

### Optimized coordinates for acid PhOCH<sub>2</sub>CO<sub>2</sub>H (4a).

UB3LYP/6-311+G(2d,p)

| Center Number | Atomic Number | Atomic Type | Coordinates (Angstroms) |           |           |
|---------------|---------------|-------------|-------------------------|-----------|-----------|
|               |               |             | X                       | Y         | Z         |
| 1             | 6             | 0           | 2.710630                | -1.290383 | 0.000038  |
| 2             | 6             | 0           | 1.326149                | -1.118237 | 0.000072  |
| 3             | 6             | 0           | 0.798395                | 0.171704  | 0.000003  |
| 4             | 6             | 0           | 1.652347                | 1.277063  | -0.000098 |
| 5             | 6             | 0           | 3.024514                | 1.088829  | -0.000129 |
| 6             | 6             | 0           | 3.564448                | -0.197444 | -0.000062 |
| 7             | 1             | 0           | 3.114770                | -2.295832 | 0.000092  |
| 8             | 1             | 0           | 0.685048                | -1.988686 | 0.000154  |
| 9             | 1             | 0           | 1.217987                | 2.268842  | -0.000151 |
| 10            | 1             | 0           | 3.679338                | 1.952217  | -0.000208 |
| 11            | 8             | 0           | -0.540574               | 0.464123  | 0.000033  |
| 12            | 6             | 0           | -1.454419               | -0.606602 | 0.000059  |
| 13            | 1             | 0           | -1.334256               | -1.241817 | 0.885026  |
| 14            | 1             | 0           | -1.334221               | -1.241893 | -0.884846 |
| 15            | 6             | 0           | -2.889568               | -0.121600 | 0.000013  |
| 16            | 8             | 0           | -3.815049               | -0.892409 | -0.000019 |
| 17            | 8             | 0           | -3.029095               | 1.212885  | 0.000062  |
| 18            | 1             | 0           | -3.983572               | 1.391162  | 0.000047  |
| 19            | 1             | 0           | 4.637676                | -0.340769 | -0.000087 |

### Optimized coordinates for radical cation 4a<sup>+•</sup>

UB3LYP/6-311+G(2d,p)

| Center Number | Atomic Number | Atomic Type | Coordinates (Angstroms) |           |           |
|---------------|---------------|-------------|-------------------------|-----------|-----------|
|               |               |             | X                       | Y         | Z         |
| 1             | 6             | 0           | 2.720917                | -1.297233 | 0.000077  |
| 2             | 6             | 0           | 1.358319                | -1.183714 | 0.000060  |
| 3             | 6             | 0           | 0.785292                | 0.123386  | -0.000041 |
| 4             | 6             | 0           | 1.619162                | 1.292988  | -0.000124 |
| 5             | 6             | 0           | 2.978897                | 1.149871  | -0.000106 |
| 6             | 6             | 0           | 3.542443                | -0.140691 | -0.000006 |
| 7             | 1             | 0           | 3.182971                | -2.276248 | 0.000155  |
| 8             | 1             | 0           | 0.730494                | -2.063633 | 0.000125  |
| 9             | 1             | 0           | 1.132668                | 2.260185  | -0.000200 |
| 10            | 1             | 0           | 3.621459                | 2.020630  | -0.000167 |
| 11            | 8             | 0           | -0.495997               | 0.374761  | -0.000064 |
| 12            | 6             | 0           | -1.499997               | -0.673606 | -0.000007 |
| 13            | 1             | 0           | -1.382049               | -1.287559 | 0.893806  |
| 14            | 1             | 0           | -1.381968               | -1.287755 | -0.893671 |
| 15            | 6             | 0           | -2.905758               | -0.091199 | -0.000159 |
| 16            | 8             | 0           | -3.846009               | -0.830527 | 0.000198  |
| 17            | 8             | 0           | -2.938964               | 1.242016  | 0.000056  |
| 18            | 1             | 0           | -3.870883               | 1.522530  | 0.000259  |
| 19            | 1             | 0           | 4.619418                | -0.256966 | 0.000009  |

### Optimized coordinates for acid 4-MePhOCH<sub>2</sub>CO<sub>2</sub>H (4b).

UB3LYP/6-311+G(2d,p)

| Center Number | Atomic Number | Atomic Type | Coordinates (Angstroms) |           |           |
|---------------|---------------|-------------|-------------------------|-----------|-----------|
|               |               |             | X                       | Y         | Z         |
| 1             | 6             | 0           | 2.261300                | -1.190306 | 0.002081  |
| 2             | 6             | 0           | 0.871425                | -1.053857 | 0.001529  |
| 3             | 6             | 0           | 0.309321                | 0.218306  | -0.000878 |
| 4             | 6             | 0           | 1.141846                | 1.339835  | -0.002762 |
| 5             | 6             | 0           | 2.515869                | 1.181345  | -0.002189 |
| 6             | 6             | 0           | 3.107947                | -0.088507 | 0.000247  |

|    |   |   |           |           |           |
|----|---|---|-----------|-----------|-----------|
| 7  | 1 | 0 | 2.684135  | -2.189068 | 0.003964  |
| 8  | 1 | 0 | 0.256252  | -1.943027 | 0.002970  |
| 9  | 1 | 0 | 0.689549  | 2.323704  | -0.004639 |
| 10 | 1 | 0 | 3.146232  | 2.064434  | -0.003668 |
| 11 | 8 | 0 | -1.037513 | 0.480749  | -0.001593 |
| 12 | 6 | 0 | -1.921995 | -0.613200 | 0.000278  |
| 13 | 1 | 0 | -1.784637 | -1.244066 | 0.886178  |
| 14 | 1 | 0 | -1.784904 | -1.247233 | -0.883270 |
| 15 | 6 | 0 | -3.369605 | -0.167287 | -0.000202 |
| 16 | 8 | 0 | -4.274716 | -0.962151 | -0.005157 |
| 17 | 8 | 0 | -3.545444 | 1.163121  | 0.006305  |
| 18 | 1 | 0 | -4.504489 | 1.314790  | 0.005805  |
| 19 | 6 | 0 | 4.608213  | -0.241986 | 0.000799  |
| 20 | 1 | 0 | 5.056975  | 0.228626  | 0.880126  |
| 21 | 1 | 0 | 4.899023  | -1.293578 | 0.002655  |
| 22 | 1 | 0 | 5.057305  | 0.225602  | -0.879969 |

### Optimized coordinates for radical cation of 4-MePhOCH<sub>2</sub>CO<sub>2</sub>H (4b<sup>+</sup>).

UB3LYP/6-311+G(2d,p)

| Center Number | Atomic Number | Atomic Type | Coordinates (Angstroms) |           |           |
|---------------|---------------|-------------|-------------------------|-----------|-----------|
|               |               |             | X                       | Y         | Z         |
| 1             | 6             | 0           | 2.264147                | -1.212062 | 0.000033  |
| 2             | 6             | 0           | 0.902343                | -1.122116 | 0.000054  |
| 3             | 6             | 0           | 0.302409                | 0.169601  | -0.000002 |
| 4             | 6             | 0           | 1.118336                | 1.345770  | -0.000080 |
| 5             | 6             | 0           | 2.477720                | 1.227308  | -0.000100 |
| 6             | 6             | 0           | 3.095442                | -0.049088 | -0.000044 |
| 7             | 1             | 0           | 2.735059                | -2.187997 | 0.000075  |
| 8             | 1             | 0           | 0.294504                | -2.015957 | 0.000113  |
| 9             | 1             | 0           | 0.620775                | 2.307289  | -0.000122 |
| 10            | 1             | 0           | 3.097776                | 2.114903  | -0.000161 |
| 11            | 8             | 0           | -0.986899               | 0.397132  | 0.000012  |
| 12            | 6             | 0           | -1.959405               | -0.675720 | 0.000081  |
| 13            | 1             | 0           | -1.827961               | -1.288285 | 0.893142  |
| 14            | 1             | 0           | -1.827949               | -1.288417 | -0.892887 |
| 15            | 6             | 0           | -3.380708               | -0.133729 | 0.000031  |
| 16            | 8             | 0           | -4.302281               | -0.897026 | 0.000069  |
| 17            | 8             | 0           | -3.452742               | 1.198555  | -0.000033 |
| 18            | 1             | 0           | -4.392747               | 1.449982  | -0.000051 |
| 19            | 6             | 0           | 4.572278                | -0.197940 | -0.000044 |
| 20            | 1             | 0           | 4.895982                | -0.776016 | 0.873921  |
| 21            | 1             | 0           | 4.895960                | -0.776503 | -0.873688 |
| 22            | 1             | 0           | 5.088604                | 0.759571  | -0.000301 |

### Optimized coordinates for acid 4-t-BuPhOCH<sub>2</sub>CO<sub>2</sub>H (4c).

UB3LYP/6-311+G(2d,p)

| Center Number | Atomic Number | Atomic Type | Coordinates (Angstroms) |           |           |
|---------------|---------------|-------------|-------------------------|-----------|-----------|
|               |               |             | X                       | Y         | Z         |
| 1             | 6             | 0           | -1.154300               | 1.112051  | 0.000024  |
| 2             | 6             | 0           | 0.238813                | 1.000818  | 0.000058  |
| 3             | 6             | 0           | 0.828388                | -0.256973 | 0.000064  |
| 4             | 6             | 0           | 0.015165                | -1.391673 | 0.000055  |
| 5             | 6             | 0           | -1.360667               | -1.257535 | 0.000024  |
| 6             | 6             | 0           | -1.988701               | -0.001343 | -0.000007 |
| 7             | 1             | 0           | -1.573716               | 2.108824  | 0.000033  |
| 8             | 1             | 0           | 0.834154                | 1.903562  | 0.000074  |
| 9             | 1             | 0           | 0.482788                | -2.368461 | 0.000072  |
| 10            | 1             | 0           | -1.958930               | -2.160825 | 0.000019  |
| 11            | 8             | 0           | 2.179745                | -0.492524 | 0.000109  |
| 12            | 6             | 0           | 3.040582                | 0.620408  | -0.000001 |
| 13            | 1             | 0           | 2.889322                | 1.249708  | 0.884617  |
| 14            | 1             | 0           | 2.889239                | 1.249581  | -0.884698 |
| 15            | 6             | 0           | 4.497532                | 0.206451  | -0.000028 |
| 16            | 8             | 0           | 5.384952                | 1.021074  | -0.000022 |
| 17            | 8             | 0           | 4.702818                | -1.119782 | -0.000094 |

|    |   |   |           |           |           |
|----|---|---|-----------|-----------|-----------|
| 18 | 1 | 0 | 5.665017  | -1.249950 | -0.000118 |
| 19 | 6 | 0 | -3.522139 | 0.095290  | -0.000028 |
| 20 | 6 | 0 | -4.084336 | -0.600244 | -1.259482 |
| 21 | 1 | 0 | -3.808488 | -1.655602 | -1.297596 |
| 22 | 1 | 0 | -5.176259 | -0.541416 | -1.271040 |
| 23 | 1 | 0 | -3.708915 | -0.124078 | -2.168269 |
| 24 | 6 | 0 | -4.013405 | 1.552225  | -0.000139 |
| 25 | 1 | 0 | -5.105622 | 1.570655  | -0.000170 |
| 26 | 1 | 0 | -3.675281 | 2.095983  | 0.885080  |
| 27 | 1 | 0 | -3.675218 | 2.095847  | -0.885419 |
| 28 | 6 | 0 | -4.084351 | -0.600066 | 1.259526  |
| 29 | 1 | 0 | -5.176272 | -0.541188 | 1.271086  |
| 30 | 1 | 0 | -3.808537 | -1.655427 | 1.297735  |
| 31 | 1 | 0 | -3.708895 | -0.123803 | 2.168247  |

### Optimized coordinates for radical cation of 4-t-BuPhOCH<sub>2</sub>CO<sub>2</sub>H (4c<sup>+</sup>).

UB3LYP/6-311+G(2d,p)

| Center Number | Atomic Number | Atomic Type | Coordinates (Angstroms) |           |           |
|---------------|---------------|-------------|-------------------------|-----------|-----------|
|               |               |             | X                       | Y         | Z         |
| 1             | 6             | 0           | -1.171460               | -1.104737 | -0.000585 |
| 2             | 6             | 0           | 0.192073                | -1.048539 | -0.000899 |
| 3             | 6             | 0           | 0.823882                | 0.224364  | -0.000811 |
| 4             | 6             | 0           | 0.032807                | 1.414754  | -0.000487 |
| 5             | 6             | 0           | -1.330005               | 1.329562  | -0.000118 |
| 6             | 6             | 0           | -1.990391               | 0.072496  | -0.000074 |
| 7             | 1             | 0           | -1.649922               | -2.074298 | -0.000739 |
| 8             | 1             | 0           | 0.775818                | -1.958315 | -0.001293 |
| 9             | 1             | 0           | 0.549922                | 2.366017  | -0.000522 |
| 10            | 1             | 0           | -1.911841               | 2.239482  | 0.000156  |
| 11            | 8             | 0           | 2.120014                | 0.422426  | -0.001117 |
| 12            | 6             | 0           | 3.060278                | -0.676245 | -0.001020 |
| 13            | 1             | 0           | 2.913237                | -1.285445 | -0.894087 |
| 14            | 1             | 0           | 2.911740                | -1.286756 | 0.890882  |
| 15            | 6             | 0           | 4.496428                | -0.176069 | 0.000546  |
| 16            | 8             | 0           | 5.397145                | -0.964393 | 0.001698  |
| 17            | 8             | 0           | 4.607895                | 1.153889  | 0.000352  |
| 18            | 1             | 0           | 5.555091                | 1.376224  | 0.001300  |
| 19            | 6             | 0           | -3.494456               | -0.065591 | 0.000366  |
| 20            | 6             | 0           | -4.221017               | 1.288101  | 0.000782  |
| 21            | 1             | 0           | -3.989368               | 1.880538  | -0.887002 |
| 22            | 1             | 0           | -5.297798               | 1.116905  | 0.000980  |
| 23            | 1             | 0           | -3.988969               | 1.880233  | 0.888663  |
| 24            | 6             | 0           | -3.917150               | -0.863154 | 1.267594  |
| 25            | 1             | 0           | -5.003040               | -0.970951 | 1.262076  |
| 26            | 1             | 0           | -3.486444               | -1.864670 | 1.297948  |
| 27            | 1             | 0           | -3.632284               | -0.336130 | 2.179763  |
| 28            | 6             | 0           | -3.917960               | -0.862863 | -1.266714 |
| 29            | 1             | 0           | -5.003818               | -0.970927 | -1.260425 |
| 30            | 1             | 0           | -3.633887               | -0.335494 | -2.178931 |
| 31            | 1             | 0           | -3.487035               | -1.864266 | -1.297711 |

### Optimized coordinates 4-MeOPhOCH<sub>2</sub>CO<sub>2</sub>H cis 4dc

UB3LYP/6-311+G(2d,p)

| Center Number | Atomic Number | Atomic Type | Coordinates (Angstroms) |           |           |
|---------------|---------------|-------------|-------------------------|-----------|-----------|
|               |               |             | X                       | Y         | Z         |
| 1             | 6             | 0           | 1.925133                | -0.942322 | 0.000160  |
| 2             | 6             | 0           | 0.526093                | -0.887666 | -0.000051 |
| 3             | 6             | 0           | -0.123594               | 0.338454  | -0.000233 |
| 4             | 6             | 0           | 0.630585                | 1.516422  | -0.000364 |
| 5             | 6             | 0           | 2.008848                | 1.461919  | -0.000141 |
| 6             | 6             | 0           | 2.671684                | 0.228451  | 0.000199  |
| 7             | 1             | 0           | 2.404632                | -1.910991 | 0.000162  |
| 8             | 1             | 0           | -0.025581               | -1.817543 | -0.000101 |
| 9             | 1             | 0           | 0.111765                | 2.466762  | -0.000648 |
| 10            | 1             | 0           | 2.599381                | 2.369544  | -0.000294 |

|    |   |   |           |           |           |
|----|---|---|-----------|-----------|-----------|
| 11 | 8 | 0 | -1.487997 | 0.508513  | -0.000363 |
| 12 | 6 | 0 | -2.290210 | -0.645530 | -0.000097 |
| 13 | 1 | 0 | -2.107280 | -1.266858 | 0.884700  |
| 14 | 1 | 0 | -2.107580 | -1.267095 | -0.884780 |
| 15 | 6 | 0 | -3.766526 | -0.307267 | 0.000091  |
| 16 | 8 | 0 | -4.611123 | -1.166337 | -0.000265 |
| 17 | 8 | 0 | -4.039829 | 1.006648  | 0.000676  |
| 18 | 1 | 0 | -5.007458 | 1.086938  | 0.000751  |
| 19 | 8 | 0 | 4.038210  | 0.287084  | 0.000254  |
| 20 | 6 | 0 | 4.759076  | -0.934336 | 0.000052  |
| 21 | 1 | 0 | 5.812115  | -0.660793 | -0.000065 |
| 22 | 1 | 0 | 4.539798  | -1.528014 | 0.893392  |
| 23 | 1 | 0 | 4.539586  | -1.527960 | -0.893221 |

## Optimized coordinates 4-MeOPhOCH<sub>2</sub>CO<sub>2</sub>H trans 4dt

UB3LYP/6-311+G(2d,p)

| Center<br>Number | Atomic<br>Number | Atomic<br>Type | Coordinates (Angstroms) |           |           |
|------------------|------------------|----------------|-------------------------|-----------|-----------|
|                  |                  |                | X                       | Y         | Z         |
| 1                | 6                | 0              | 1.767951                | -1.352438 | -0.000422 |
| 2                | 6                | 0              | 0.393603                | -1.147135 | -0.000379 |
| 3                | 6                | 0              | -0.115163               | 0.151970  | -0.000347 |
| 4                | 6                | 0              | 0.764844                | 1.229098  | -0.000131 |
| 5                | 6                | 0              | 2.138860                | 1.023196  | -0.000179 |
| 6                | 6                | 0              | 2.650833                | -0.275848 | -0.000463 |
| 7                | 1                | 0              | 2.171558                | -2.357201 | -0.000320 |
| 8                | 1                | 0              | -0.260136               | -2.008236 | -0.000323 |
| 9                | 1                | 0              | 0.359812                | 2.233241  | 0.000069  |
| 10               | 1                | 0              | 2.794990                | 1.882132  | 0.000242  |
| 11               | 8                | 0              | -1.453032               | 0.471279  | -0.000625 |
| 12               | 6                | 0              | -2.380865               | -0.584492 | 0.000149  |
| 13               | 1                | 0              | -2.271101               | -1.222523 | 0.885147  |
| 14               | 1                | 0              | -2.271682               | -1.223325 | -0.884349 |
| 15               | 6                | 0              | -3.809174               | -0.080001 | 0.000386  |
| 16               | 8                | 0              | -4.746330               | -0.836935 | 0.000997  |
| 17               | 8                | 0              | -3.930966               | 1.256655  | -0.000397 |
| 18               | 1                | 0              | -4.883193               | 1.446506  | -0.000265 |
| 19               | 8                | 0              | 3.982790                | -0.589034 | -0.000469 |
| 20               | 6                | 0              | 4.921818                | 0.474107  | 0.001223  |
| 21               | 1                | 0              | 5.903751                | 0.005544  | 0.001646  |
| 22               | 1                | 0              | 4.820813                | 1.099344  | -0.891724 |
| 23               | 1                | 0              | 4.819245                | 1.098066  | 0.894810  |

## Optimized coordinates for radical cation 4dt<sup>•+</sup>

UB3LYP/6-311+G(2d,p)

| Center<br>Number | Atomic<br>Number | Atomic<br>Type | Coordinates (Angstroms) |           |           |
|------------------|------------------|----------------|-------------------------|-----------|-----------|
|                  |                  |                | X                       | Y         | Z         |
| 1                | 6                | 0              | 1.767951                | -1.352438 | -0.000422 |
| 2                | 6                | 0              | 0.393603                | -1.147135 | -0.000379 |
| 3                | 6                | 0              | -0.115163               | 0.151970  | -0.000347 |
| 4                | 6                | 0              | 0.764844                | 1.229098  | -0.000131 |
| 5                | 6                | 0              | 2.138860                | 1.023196  | -0.000179 |
| 6                | 6                | 0              | 2.650833                | -0.275848 | -0.000463 |
| 7                | 1                | 0              | 2.171558                | -2.357201 | -0.000320 |
| 8                | 1                | 0              | -0.260136               | -2.008236 | -0.000323 |
| 9                | 1                | 0              | 0.359812                | 2.233241  | 0.000069  |
| 10               | 1                | 0              | 2.794990                | 1.882132  | 0.000242  |
| 11               | 8                | 0              | -1.453032               | 0.471279  | -0.000625 |
| 12               | 6                | 0              | -2.380865               | -0.584492 | 0.000149  |
| 13               | 1                | 0              | -2.271101               | -1.222523 | 0.885147  |
| 14               | 1                | 0              | -2.271682               | -1.223325 | -0.884349 |
| 15               | 6                | 0              | -3.809174               | -0.080001 | 0.000386  |
| 16               | 8                | 0              | -4.746330               | -0.836935 | 0.000997  |
| 17               | 8                | 0              | -3.930966               | 1.256655  | -0.000397 |
| 18               | 1                | 0              | -4.883193               | 1.446506  | -0.000265 |
| 19               | 8                | 0              | 3.982790                | -0.589034 | -0.000469 |

|    |   |   |          |          |           |
|----|---|---|----------|----------|-----------|
| 20 | 6 | 0 | 4.921818 | 0.474107 | 0.001223  |
| 21 | 1 | 0 | 5.903751 | 0.005544 | 0.001646  |
| 22 | 1 | 0 | 4.820813 | 1.099344 | -0.891724 |
| 23 | 1 | 0 | 4.819245 | 1.098066 | 0.894810  |

### Optimized coordinates for radical cation **4dc<sup>+</sup>**

UB3LYP/6-311+G(2d,p)

| Center Number | Atomic Number | Atomic Type | Coordinates (Angstroms) |           |           |
|---------------|---------------|-------------|-------------------------|-----------|-----------|
|               |               |             | X                       | Y         | Z         |
| 1             | 6             | 0           | 1.925133                | -0.942322 | 0.000160  |
| 2             | 6             | 0           | 0.526093                | -0.887666 | -0.000051 |
| 3             | 6             | 0           | -0.123594               | 0.338454  | -0.000233 |
| 4             | 6             | 0           | 0.630585                | 1.516422  | -0.000364 |
| 5             | 6             | 0           | 2.008848                | 1.461919  | -0.000141 |
| 6             | 6             | 0           | 2.671684                | 0.228451  | 0.000199  |
| 7             | 1             | 0           | 2.404632                | -1.910991 | 0.000162  |
| 8             | 1             | 0           | -0.025581               | -1.817543 | -0.000101 |
| 9             | 1             | 0           | 0.111765                | 2.466762  | -0.000648 |
| 10            | 1             | 0           | 2.599381                | 2.369544  | -0.000294 |
| 11            | 8             | 0           | -1.487997               | 0.508513  | -0.000363 |
| 12            | 6             | 0           | -2.290210               | -0.645530 | -0.000097 |
| 13            | 1             | 0           | -2.107280               | -1.266858 | 0.884700  |
| 14            | 1             | 0           | -2.107580               | -1.267095 | -0.884780 |
| 15            | 6             | 0           | -3.766526               | -0.307267 | 0.000091  |
| 16            | 8             | 0           | -4.611123               | -1.166337 | -0.000265 |
| 17            | 8             | 0           | -4.039829               | 1.006648  | 0.000676  |
| 18            | 1             | 0           | -5.007458               | 1.086938  | 0.000751  |
| 19            | 8             | 0           | 4.038210                | 0.287084  | 0.000254  |
| 20            | 6             | 0           | 4.759076                | -0.934336 | 0.000052  |
| 21            | 1             | 0           | 5.812115                | -0.660793 | -0.000065 |
| 22            | 1             | 0           | 4.539798                | -1.528014 | 0.893392  |
| 23            | 1             | 0           | 4.539586                | -1.527960 | -0.893221 |

Energy scan for MeO–ring dihedral UB3LYP/6-31G(d) of 4-MeOPhOCH<sub>2</sub>CO<sub>2</sub>H radical cation.

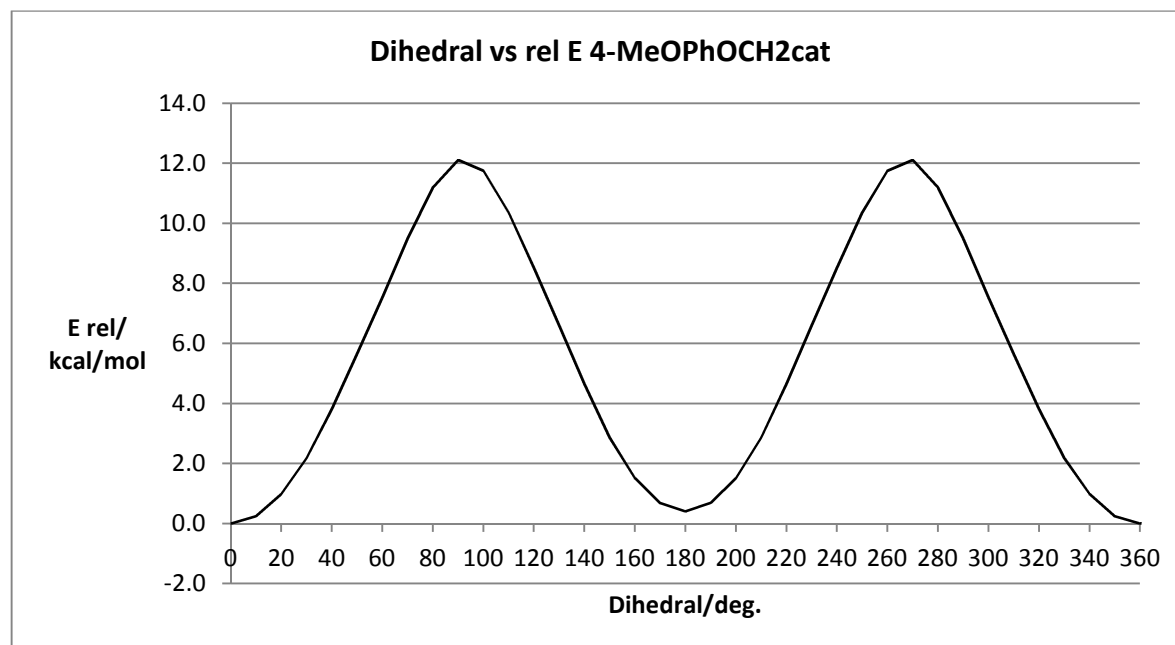

Figure S25. Relative Energy vs. dihedral angle for **4dc<sup>+</sup>**

### Optimized coordinates 3-MeOPhOCH<sub>2</sub>CO<sub>2</sub>H **4e**

UB3LYP/6-311+G(2d,p)

| Center<br>Number | Atomic<br>Number | Atomic<br>Type | Coordinates (Angstroms) |           |           |
|------------------|------------------|----------------|-------------------------|-----------|-----------|
|                  |                  |                | X                       | Y         | Z         |
| 1                | 6                | 0              | 2.185627                | -0.311584 | -0.000041 |
| 2                | 6                | 0              | 0.792969                | -0.465985 | 0.000009  |
| 3                | 6                | 0              | -0.019932               | 0.658523  | 0.000026  |
| 4                | 6                | 0              | 0.540231                | 1.941332  | -0.000007 |
| 5                | 6                | 0              | 1.915087                | 2.071519  | -0.000067 |
| 6                | 6                | 0              | 2.757098                | 0.956429  | -0.000089 |
| 7                | 1                | 0              | 0.398917                | -1.471985 | 0.000044  |
| 8                | 1                | 0              | -0.115283               | 2.801887  | 0.000009  |
| 9                | 1                | 0              | 2.354492                | 3.062017  | -0.000104 |
| 10               | 8                | 0              | -1.388344               | 0.615101  | 0.000089  |
| 11               | 6                | 0              | -2.012916               | -0.646644 | 0.000043  |
| 12               | 1                | 0              | -1.740332               | -1.233063 | 0.884780  |
| 13               | 1                | 0              | -1.740312               | -1.233008 | -0.884724 |
| 14               | 6                | 0              | -3.522744               | -0.526623 | 0.000040  |
| 15               | 8                | 0              | -4.232675               | -1.499714 | -0.000164 |
| 16               | 8                | 0              | -3.984454               | 0.733520  | 0.000088  |
| 17               | 1                | 0              | -4.953462               | 0.672100  | 0.000009  |
| 18               | 1                | 0              | 3.828543                | 1.092399  | -0.000158 |
| 19               | 8                | 0              | 2.890225                | -1.479412 | -0.000094 |
| 20               | 6                | 0              | 4.309135                | -1.410592 | 0.000125  |
| 21               | 1                | 0              | 4.682633                | -0.901432 | 0.893473  |
| 22               | 1                | 0              | 4.656535                | -2.441493 | 0.000295  |
| 23               | 1                | 0              | 4.682928                | -0.901636 | -0.893218 |

Optimized coordinates for radical cation of 3-MeOPhOCH<sub>2</sub>CO<sub>2</sub>H 4e<sup>+</sup>

UB3LYP/6-311+G(2d,p)

| Center<br>Number | Atomic<br>Number | Atomic<br>Type | Coordinates (Angstroms) |           |           |
|------------------|------------------|----------------|-------------------------|-----------|-----------|
|                  |                  |                | X                       | Y         | Z         |
| 1                | 6                | 0              | 2.185305                | -0.332645 | 0.000018  |
| 2                | 6                | 0              | 0.800755                | -0.538953 | 0.000030  |
| 3                | 6                | 0              | -0.030332               | 0.564852  | 0.000006  |
| 4                | 6                | 0              | 0.518072                | 1.900730  | -0.000032 |
| 5                | 6                | 0              | 1.891569                | 2.091931  | -0.000046 |
| 6                | 6                | 0              | 2.737803                | 1.001111  | -0.000023 |
| 7                | 1                | 0              | 0.433168                | -1.554485 | 0.000061  |
| 8                | 1                | 0              | -0.177814               | 2.730268  | -0.000049 |
| 9                | 1                | 0              | 2.297955                | 3.094683  | -0.000077 |
| 10               | 8                | 0              | -1.351204               | 0.544966  | 0.000016  |
| 11               | 6                | 0              | -2.057741               | -0.707703 | 0.000044  |
| 12               | 1                | 0              | -1.795913               | -1.282483 | 0.891194  |
| 13               | 1                | 0              | -1.795877               | -1.282547 | -0.891053 |
| 14               | 6                | 0              | -3.563277               | -0.498819 | 0.000011  |
| 15               | 8                | 0              | -4.297283               | -1.445014 | -0.000093 |
| 16               | 8                | 0              | -3.933437               | 0.784722  | -0.000034 |
| 17               | 1                | 0              | -4.905716               | 0.814384  | -0.000106 |
| 18               | 1                | 0              | 3.809303                | 1.141528  | -0.000041 |
| 19               | 8                | 0              | 2.930543                | -1.413352 | 0.000039  |
| 20               | 6                | 0              | 4.381023                | -1.363386 | 0.000064  |
| 21               | 1                | 0              | 4.738157                | -0.865627 | 0.900792  |
| 22               | 1                | 0              | 4.690526                | -2.403224 | 0.000154  |
| 23               | 1                | 0              | 4.738185                | -0.865775 | -0.900735 |

Optimized coordinates for acid 2-MeOPhOCH<sub>2</sub>CO<sub>2</sub>H 4f

UB3LYP/6-311+G(2d,p)

| Center<br>Number | Atomic<br>Number | Atomic<br>Type | Coordinates (Angstroms) |           |           |
|------------------|------------------|----------------|-------------------------|-----------|-----------|
|                  |                  |                | X                       | Y         | Z         |
| 1                | 6                | 0              | 2.735775                | 0.363200  | -0.000026 |
| 2                | 6                | 0              | 1.346969                | 0.495211  | -0.000141 |
| 3                | 6                | 0              | 0.550613                | -0.668423 | 0.000016  |



|    |   |   |           |           |           |
|----|---|---|-----------|-----------|-----------|
| 4  | 6 | 0 | 1.176022  | -1.912424 | 0.000228  |
| 5  | 6 | 0 | 2.558761  | -2.031929 | 0.000310  |
| 6  | 6 | 0 | 3.343091  | -0.888135 | 0.000197  |
| 7  | 1 | 0 | 0.537742  | -2.787199 | 0.000334  |
| 8  | 1 | 0 | 3.013445  | -3.014618 | 0.000477  |
| 9  | 8 | 0 | -0.819254 | -0.737904 | -0.000068 |
| 10 | 6 | 0 | -1.661379 | 0.398361  | 0.000478  |
| 11 | 1 | 0 | -1.506367 | 1.024111  | -0.880213 |
| 12 | 1 | 0 | -1.506065 | 1.023479  | 0.881568  |
| 13 | 6 | 0 | -3.119172 | -0.013489 | 0.000631  |
| 14 | 8 | 0 | -4.004476 | 0.804735  | 0.000345  |
| 15 | 8 | 0 | -3.336370 | -1.339167 | -0.000576 |
| 16 | 1 | 0 | -4.300002 | -1.457752 | -0.000986 |
| 17 | 1 | 0 | 4.423628  | -0.957106 | 0.000270  |
| 18 | 1 | 0 | 3.354895  | 1.248867  | -0.000133 |
| 19 | 8 | 0 | 0.708370  | 1.709458  | -0.000439 |
| 20 | 6 | 0 | 1.495907  | 2.891178  | -0.000603 |
| 21 | 1 | 0 | 2.124248  | 2.952295  | 0.892722  |
| 22 | 1 | 0 | 2.124420  | 2.951930  | -0.893833 |
| 23 | 1 | 0 | 0.788379  | 3.717726  | -0.000839 |

### Optimized coordinates for Radical cation of 2-MeOPhOCH<sub>2</sub>CO<sub>2</sub>H 4f<sup>+</sup>

UB3LYP/6-311+G(2d,p)

| Center Number | Atomic Number | Atomic Type | Coordinates (Angstroms) |           |           |
|---------------|---------------|-------------|-------------------------|-----------|-----------|
|               |               |             | X                       | Y         | Z         |
| 1             | 6             | 0           | -2.763968               | 0.363580  | -0.000072 |
| 2             | 6             | 0           | -1.371569               | 0.518080  | 0.000078  |
| 3             | 6             | 0           | -0.528527               | -0.672648 | 0.000058  |
| 4             | 6             | 0           | -1.139206               | -1.949868 | -0.000062 |
| 5             | 6             | 0           | -2.498652               | -2.062146 | -0.000197 |
| 6             | 6             | 0           | -3.316114               | -0.897109 | -0.000209 |
| 7             | 1             | 0           | -0.486633               | -2.813000 | -0.000058 |
| 8             | 1             | 0           | -2.963831               | -3.039299 | -0.000304 |
| 9             | 8             | 0           | 0.782370                | -0.691195 | 0.000174  |
| 10            | 6             | 0           | 1.680400                | 0.443838  | 0.000098  |
| 11            | 1             | 0           | 1.511089                | 1.050556  | 0.888213  |
| 12            | 1             | 0           | 1.510849                | 1.050649  | -0.887903 |
| 13            | 6             | 0           | 3.128031                | -0.019658 | -0.000120 |
| 14            | 8             | 0           | 4.005703                | 0.795448  | -0.000235 |
| 15            | 8             | 0           | 3.282859                | -1.345590 | -0.000181 |
| 16            | 1             | 0           | 4.236938                | -1.535927 | -0.000325 |
| 17            | 1             | 0           | -4.393424               | -1.005819 | -0.000322 |
| 18            | 1             | 0           | -3.403202               | 1.234108  | -0.000073 |
| 19            | 8             | 0           | -0.740474               | 1.676390  | 0.000264  |
| 20            | 6             | 0           | -1.481596               | 2.925333  | 0.000343  |
| 21            | 1             | 0           | -2.092889               | 2.990852  | -0.899181 |
| 22            | 1             | 0           | -2.093080               | 2.990624  | 0.899753  |
| 23            | 1             | 0           | -0.722281               | 3.700418  | 0.000521  |

### Optimized coordinates for acid 3,5-Di-MeOPhOCH<sub>2</sub>CO<sub>2</sub>H 4g

UB3LYP/6-311+G(2d,p)

| Center Number | Atomic Number | Atomic Type | Coordinates (Angstroms) |           |           |
|---------------|---------------|-------------|-------------------------|-----------|-----------|
|               |               |             | X                       | Y         | Z         |
| 1             | 6             | 0           | 1.674624                | 1.382942  | -0.000222 |
| 2             | 6             | 0           | 0.299625                | 1.108613  | 0.000838  |
| 3             | 6             | 0           | -0.104286               | -0.224278 | 0.001426  |
| 4             | 6             | 0           | 0.816353                | -1.270731 | 0.000988  |
| 5             | 6             | 0           | 2.174972                | -0.965622 | -0.000006 |
| 6             | 6             | 0           | 2.609851                | 0.358931  | -0.000654 |
| 7             | 1             | 0           | -0.420082               | 1.910134  | 0.001499  |
| 8             | 1             | 0           | 0.442887                | -2.283222 | 0.001415  |
| 9             | 8             | 0           | -1.418007               | -0.619093 | 0.002709  |
| 10            | 6             | 0           | -2.413973               | 0.374197  | 0.000680  |
| 11            | 1             | 0           | -2.344842               | 1.015802  | -0.885146 |
| 12            | 1             | 0           | -2.347019               | 1.017478  | 0.885419  |

|    |   |   |           |           |           |
|----|---|---|-----------|-----------|-----------|
| 13 | 6 | 0 | -3.805932 | -0.223175 | -0.000402 |
| 14 | 8 | 0 | -4.789684 | 0.472049  | 0.000372  |
| 15 | 8 | 0 | -3.840631 | -1.564650 | -0.002686 |
| 16 | 1 | 0 | -4.778479 | -1.816228 | -0.003357 |
| 17 | 8 | 0 | 3.161323  | -1.905381 | -0.000545 |
| 18 | 8 | 0 | 2.186205  | 2.647644  | -0.000757 |
| 19 | 6 | 0 | 2.790329  | -3.276796 | -0.000198 |
| 20 | 1 | 0 | 2.212450  | -3.533134 | -0.892997 |
| 21 | 1 | 0 | 3.723297  | -3.836344 | -0.000927 |
| 22 | 1 | 0 | 2.213892  | -3.533051 | 0.893572  |
| 23 | 6 | 0 | 1.291578  | 3.749661  | -0.000602 |
| 24 | 1 | 0 | 0.661068  | 3.753608  | 0.893812  |
| 25 | 1 | 0 | 1.917500  | 4.639494  | -0.001350 |
| 26 | 1 | 0 | 0.659981  | 3.752914  | -0.894286 |
| 27 | 1 | 0 | 3.666863  | 0.585544  | -0.001473 |

### Optimized coordinates for radical cation 3,5-Di-MeOPhOCH<sub>2</sub>CO<sub>2</sub>H 4g<sup>+</sup>

UB3LYP/6-311+G(2d,p)

| Center Number | Atomic Number | Atomic Type | Coordinates (Angstroms) |           |           |
|---------------|---------------|-------------|-------------------------|-----------|-----------|
|               |               |             | X                       | Y         | Z         |
| 1             | 6             | 0           | 1.676943                | 1.383432  | -0.000234 |
| 2             | 6             | 0           | 0.311076                | 1.170500  | 0.000565  |
| 3             | 6             | 0           | -0.135165               | -0.163908 | 0.000969  |
| 4             | 6             | 0           | 0.755844                | -1.280270 | 0.000709  |
| 5             | 6             | 0           | 2.114938                | -1.058182 | -0.000147 |
| 6             | 6             | 0           | 2.590783                | 0.276789  | -0.000637 |
| 7             | 1             | 0           | -0.385550               | 1.992042  | 0.000976  |
| 8             | 1             | 0           | 0.317097                | -2.266813 | 0.001215  |
| 9             | 8             | 0           | -1.406146               | -0.514790 | 0.001776  |
| 10            | 6             | 0           | -2.456518               | 0.468798  | 0.001399  |
| 11            | 1             | 0           | -2.382277               | 1.094124  | -0.890159 |
| 12            | 1             | 0           | -2.383961               | 1.092790  | 0.894048  |
| 13            | 6             | 0           | -3.829917               | -0.183176 | -0.000420 |
| 14            | 8             | 0           | -4.813162               | 0.500713  | -0.001003 |
| 15            | 8             | 0           | -3.800023               | -1.518385 | -0.001213 |
| 16            | 1             | 0           | -4.719381               | -1.836280 | -0.002326 |
| 17            | 8             | 0           | 3.068669                | -1.986575 | -0.000561 |
| 18            | 8             | 0           | 2.282992                | 2.557615  | -0.000587 |
| 19            | 6             | 0           | 2.692039                | -3.375704 | -0.000109 |
| 20            | 1             | 0           | 2.117073                | -3.612827 | -0.897339 |
| 21            | 1             | 0           | 3.626910                | -3.927021 | -0.001084 |
| 22            | 1             | 0           | 2.118977                | -3.612802 | 0.898350  |
| 23            | 6             | 0           | 1.506667                | 3.773611  | -0.000271 |
| 24            | 1             | 0           | 0.891166                | 3.823366  | 0.899177  |
| 25            | 1             | 0           | 2.235776                | 4.577201  | -0.000972 |
| 26            | 1             | 0           | 0.889832                | 3.823008  | -0.898836 |
| 27            | 1             | 0           | 3.655540                | 0.473246  | -0.001290 |

### Optimized coordinates for acid 3,4,5-Tri-MeOPhOCH<sub>2</sub>CO<sub>2</sub>H 4h

UB3LYP/6-311+G(2d,p)

| Center Number | Atomic Number | Atomic Type | Coordinates (Angstroms) |           |           |
|---------------|---------------|-------------|-------------------------|-----------|-----------|
|               |               |             | X                       | Y         | Z         |
| 1             | 6             | 0           | -1.275311               | -1.088471 | -0.000108 |
| 2             | 6             | 0           | 0.122593                | -0.955479 | 0.000052  |
| 3             | 6             | 0           | 0.693700                | 0.307394  | 0.000181  |
| 4             | 6             | 0           | -0.105484               | 1.445603  | 0.000157  |
| 5             | 6             | 0           | -1.486665               | 1.310853  | 0.000022  |
| 6             | 6             | 0           | -2.104339               | 0.038643  | -0.000104 |
| 7             | 1             | 0           | 0.735477                | -1.841021 | 0.000079  |
| 8             | 1             | 0           | 0.373046                | 2.412804  | 0.000248  |
| 9             | 8             | 0           | 2.049301                | 0.544401  | 0.000358  |
| 10            | 6             | 0           | 2.910845                | -0.564683 | 0.000079  |
| 11            | 1             | 0           | 2.762567                | -1.194684 | -0.885151 |
| 12            | 1             | 0           | 2.762726                | -1.195025 | 0.885091  |
| 13            | 6             | 0           | 4.367239                | -0.149046 | 0.000033  |

|    |   |   |           |           |           |
|----|---|---|-----------|-----------|-----------|
| 14 | 8 | 0 | 5.256024  | -0.962581 | 0.000030  |
| 15 | 8 | 0 | 4.571860  | 1.177338  | -0.000013 |
| 16 | 1 | 0 | 5.534060  | 1.307395  | -0.000045 |
| 17 | 8 | 0 | -3.468132 | 0.085729  | -0.000249 |
| 18 | 6 | 0 | -4.298134 | -1.072837 | 0.000092  |
| 19 | 1 | 0 | -5.314438 | -0.680795 | 0.000093  |
| 20 | 1 | 0 | -4.141606 | -1.683148 | -0.889723 |
| 21 | 1 | 0 | -4.141447 | -1.682723 | 0.890177  |
| 22 | 8 | 0 | -2.344346 | 2.364835  | -0.000007 |
| 23 | 8 | 0 | -1.882590 | -2.319194 | -0.000296 |
| 24 | 6 | 0 | -1.800819 | 3.675543  | 0.000114  |
| 25 | 1 | 0 | -1.195309 | 3.857876  | -0.892969 |
| 26 | 1 | 0 | -2.655560 | 4.348701  | 0.000072  |
| 27 | 1 | 0 | -1.195473 | 3.857779  | 0.893328  |
| 28 | 6 | 0 | -1.076284 | -3.485370 | -0.000319 |
| 29 | 1 | 0 | -0.447410 | -3.540419 | 0.893631  |
| 30 | 1 | 0 | -1.770419 | -4.323634 | -0.000493 |
| 31 | 1 | 0 | -0.447189 | -3.540229 | -0.894126 |

### Optimized coordinates for radical cation 3,4,5-Tri-MeOPhOCH<sub>2</sub>CO<sub>2</sub>H 4h<sup>+</sup>

UB3LYP/6-311+G(2d,p)

| Center Number | Atomic Number | Atomic Type | Coordinates (Angstroms) |           |           |
|---------------|---------------|-------------|-------------------------|-----------|-----------|
|               |               |             | X                       | Y         | Z         |
| 1             | 6             | 0           | -1.264568               | -1.127536 | -0.000001 |
| 2             | 6             | 0           | 0.110623                | -1.012850 | 0.000187  |
| 3             | 6             | 0           | 0.702970                | 0.265346  | 0.000326  |
| 4             | 6             | 0           | -0.069237               | 1.444225  | 0.000304  |
| 5             | 6             | 0           | -1.438242               | 1.359801  | 0.000119  |
| 6             | 6             | 0           | -2.087095               | 0.059709  | -0.000039 |
| 7             | 1             | 0           | 0.722755                | -1.899238 | 0.000282  |
| 8             | 1             | 0           | 0.450263                | 2.390258  | 0.000411  |
| 9             | 8             | 0           | 2.014717                | 0.469312  | 0.000533  |
| 10            | 6             | 0           | 2.933218                | -0.630464 | 0.000218  |
| 11            | 1             | 0           | 2.790871                | -1.245208 | -0.891116 |
| 12            | 1             | 0           | 2.791467                | -1.245202 | 0.891655  |
| 13            | 6             | 0           | 4.375943                | -0.152234 | -0.000279 |
| 14            | 8             | 0           | 5.272059                | -0.948349 | -0.000220 |
| 15            | 8             | 0           | 4.511957                | 1.177053  | -0.000480 |
| 16            | 1             | 0           | 5.463947                | 1.375872  | -0.000679 |
| 17            | 8             | 0           | -3.392552               | 0.115166  | -0.000219 |
| 18            | 6             | 0           | -4.322514               | -1.001688 | -0.000284 |
| 19            | 1             | 0           | -5.297466               | -0.524908 | -0.000326 |
| 20            | 1             | 0           | -4.181886               | -1.601725 | -0.895247 |
| 21            | 1             | 0           | -4.181975               | -1.601754 | 0.894673  |
| 22            | 8             | 0           | -2.281082               | 2.382375  | 0.000061  |
| 23            | 8             | 0           | -1.927607               | -2.284861 | -0.000142 |
| 24            | 6             | 0           | -1.757630               | 3.723158  | 0.000222  |
| 25            | 1             | 0           | -1.161765               | 3.897701  | -0.897147 |
| 26            | 1             | 0           | -2.629692               | 4.369390  | 0.000157  |
| 27            | 1             | 0           | -1.161991               | 3.897574  | 0.897766  |
| 28            | 6             | 0           | -1.195250               | -3.525561 | -0.000147 |
| 29            | 1             | 0           | -0.581181               | -3.602833 | 0.898325  |
| 30            | 1             | 0           | -1.951678               | -4.304262 | -0.000333 |
| 31            | 1             | 0           | -0.580908               | -3.602666 | -0.898447 |

### Optimized coordinates for acid PhSCH<sub>2</sub>CO<sub>2</sub>H 4i

UB3LYP/6-311+G(2d,p)

| Center Number | Atomic Number | Atomic Type | Coordinates (Angstroms) |           |           |
|---------------|---------------|-------------|-------------------------|-----------|-----------|
|               |               |             | X                       | Y         | Z         |
| 1             | 6             | 0           | -2.766884               | 1.475332  | 0.000037  |
| 2             | 6             | 0           | -1.429016               | 1.086639  | 0.000068  |
| 3             | 6             | 0           | -1.095623               | -0.268365 | -0.000007 |
| 4             | 6             | 0           | -2.121239               | -1.221680 | -0.000112 |
| 5             | 6             | 0           | -3.449395               | -0.824577 | -0.000140 |
| 6             | 6             | 0           | -3.782013               | 0.528409  | -0.000067 |

|    |    |   |           |           |           |
|----|----|---|-----------|-----------|-----------|
| 7  | 1  | 0 | -3.008949 | 2.531709  | 0.000095  |
| 8  | 1  | 0 | -0.665336 | 1.851550  | 0.000152  |
| 9  | 1  | 0 | -1.873695 | -2.277199 | -0.000172 |
| 10 | 1  | 0 | -4.229245 | -1.576953 | -0.000221 |
| 11 | 6  | 0 | 1.584340  | 0.587217  | 0.000093  |
| 12 | 1  | 0 | 1.371833  | 1.192897  | 0.882350  |
| 13 | 1  | 0 | 1.371827  | 1.192981  | -0.882103 |
| 14 | 6  | 0 | 3.076411  | 0.328425  | 0.000082  |
| 15 | 8  | 0 | 3.886412  | 1.218132  | -0.000197 |
| 16 | 8  | 0 | 3.412942  | -0.975355 | 0.000169  |
| 17 | 1  | 0 | 4.382692  | -1.020586 | 0.000063  |
| 18 | 1  | 0 | -4.819896 | 0.837440  | -0.000091 |
| 19 | 16 | 0 | 0.561028  | -0.926403 | 0.000027  |

### Optimized coordinates for radical cation of PhSCH<sub>2</sub>CO<sub>2</sub>H 4i<sup>•</sup>

UB3LYP/6-311+G(2d,p)

| Center<br>Number | Atomic<br>Number | Atomic<br>Type | Coordinates (Angstroms) |           |           |
|------------------|------------------|----------------|-------------------------|-----------|-----------|
|                  |                  |                | X                       | Y         | Z         |
| 1                | 6                | 0              | -2.787166               | 1.469184  | 0.000020  |
| 2                | 6                | 0              | -1.452473               | 1.140798  | 0.000040  |
| 3                | 6                | 0              | -1.077338               | -0.225522 | -0.000018 |
| 4                | 6                | 0              | -2.077085               | -1.242540 | -0.000096 |
| 5                | 6                | 0              | -3.406565               | -0.892211 | -0.000114 |
| 6                | 6                | 0              | -3.768759               | 0.460944  | -0.000057 |
| 7                | 1                | 0              | -3.086105               | 2.509545  | 0.000065  |
| 8                | 1                | 0              | -0.707155               | 1.922837  | 0.000101  |
| 9                | 1                | 0              | -1.780941               | -2.284879 | -0.000140 |
| 10               | 1                | 0              | -4.169455               | -1.659702 | -0.000173 |
| 11               | 6                | 0              | 1.617861                | 0.647150  | 0.000089  |
| 12               | 1                | 0              | 1.413264                | 1.245006  | 0.889168  |
| 13               | 1                | 0              | 1.413245                | 1.245140  | -0.888894 |
| 14               | 6                | 0              | 3.102442                | 0.288567  | 0.000047  |
| 15               | 8                | 0              | 3.939837                | 1.138137  | -0.000006 |
| 16               | 8                | 0              | 3.316253                | -1.035169 | 0.000067  |
| 17               | 1                | 0              | 4.275077                | -1.202405 | 0.000039  |
| 18               | 1                | 0              | -4.816160               | 0.736780  | -0.000071 |
| 19               | 16               | 0              | 0.531500                | -0.825892 | -0.000003 |

### Optimized coordinates for acid 4-MeO-PhSCH<sub>2</sub>CO<sub>2</sub>H 4j

UB3LYP/6-311+G(2d,p)

| Center<br>Number | Atomic<br>Number | Atomic<br>Type | Coordinates (Angstroms) |           |           |
|------------------|------------------|----------------|-------------------------|-----------|-----------|
|                  |                  |                | X                       | Y         | Z         |
| 1                | 6                | 0              | 2.087168                | -0.952837 | 0.000072  |
| 2                | 6                | 0              | 0.707355                | -0.732132 | -0.000053 |
| 3                | 6                | 0              | 0.189849                | 0.557817  | -0.000248 |
| 4                | 6                | 0              | 1.087077                | 1.635944  | -0.000325 |
| 5                | 6                | 0              | 2.450967                | 1.424460  | -0.000216 |
| 6                | 6                | 0              | 2.966619                | 0.123895  | -0.000011 |
| 7                | 1                | 0              | 2.449814                | -1.971158 | 0.000226  |
| 8                | 1                | 0              | 0.058423                | -1.596812 | -0.000001 |
| 9                | 1                | 0              | 0.708021                | 2.651659  | -0.000463 |
| 10               | 1                | 0              | 3.141296                | 2.258759  | -0.000273 |
| 11               | 6                | 0              | -2.342450               | -0.651036 | 0.000157  |
| 12               | 1                | 0              | -2.045002               | -1.220280 | 0.882355  |
| 13               | 1                | 0              | -2.045023               | -1.220987 | -0.881571 |
| 14               | 6                | 0              | -3.855662               | -0.609237 | 0.000138  |
| 15               | 8                | 0              | -4.530159               | -1.606013 | -0.000703 |
| 16               | 8                | 0              | -4.376811               | 0.632381  | 0.001287  |
| 17               | 1                | 0              | -5.342857               | 0.536692  | 0.001214  |
| 18               | 8                | 0              | 4.327946                | 0.022136  | 0.000092  |
| 19               | 6                | 0              | 4.903937                | -1.275215 | 0.000318  |
| 20               | 1                | 0              | 5.981195                | -1.123604 | 0.000394  |
| 21               | 1                | 0              | 4.617611                | -1.838943 | 0.893768  |
| 22               | 1                | 0              | 4.617771                | -1.839184 | -0.893031 |
| 23               | 16               | 0              | -1.542389               | 0.990367  | -0.000439 |

### Optimized coordinates for radical cation 4-MeO-PhSCH<sub>2</sub>CO<sub>2</sub>H 4j<sup>+</sup>

UB3LYP/6-311+G(2d,p)

| Center<br>Number | Atomic<br>Number | Atomic<br>Type | Coordinates (Angstroms) |           |           |
|------------------|------------------|----------------|-------------------------|-----------|-----------|
|                  |                  |                | X                       | Y         | Z         |
| 1                | 6                | 0              | 2.082972                | -0.989677 | 0.000065  |
| 2                | 6                | 0              | 0.725076                | -0.800426 | 0.000061  |
| 3                | 6                | 0              | 0.179271                | 0.507131  | -0.000085 |
| 4                | 6                | 0              | 1.061029                | 1.628112  | -0.000230 |
| 5                | 6                | 0              | 2.410446                | 1.445449  | -0.000226 |
| 6                | 6                | 0              | 2.950928                | 0.131359  | -0.000077 |
| 7                | 1                | 0              | 2.481538                | -1.994035 | 0.000175  |
| 8                | 1                | 0              | 0.079213                | -1.666857 | 0.000168  |
| 9                | 1                | 0              | 0.650209                | 2.630591  | -0.000343 |
| 10               | 1                | 0              | 3.096016                | 2.282814  | -0.000333 |
| 11               | 6                | 0              | -2.367601               | -0.709938 | 0.000116  |
| 12               | 1                | 0              | -2.088353               | -1.275680 | 0.889142  |
| 13               | 1                | 0              | -2.088437               | -1.275899 | -0.888794 |
| 14               | 6                | 0              | -3.886034               | -0.563300 | 0.000175  |
| 15               | 8                | 0              | -4.600162               | -1.520739 | 0.000000  |
| 16               | 8                | 0              | -4.288872               | 0.716154  | 0.000336  |
| 17               | 1                | 0              | -5.261473               | 0.738644  | 0.000332  |
| 18               | 8                | 0              | 4.264685                | 0.059728  | -0.000087 |
| 19               | 6                | 0              | 4.951201                | -1.213716 | 0.000054  |
| 20               | 1                | 0              | 6.006697                | -0.962258 | 0.000023  |
| 21               | 1                | 0              | 4.698581                | -1.775117 | 0.899584  |
| 22               | 1                | 0              | 4.698576                | -1.775318 | -0.899350 |
| 23               | 16               | 0              | -1.495093               | 0.901376  | -0.000107 |

### Optimized coordinates for *transoid* acid 4-MeS-PhOCH<sub>2</sub>CO<sub>2</sub>H 4kt

UB3LYP/6-311+G(2d,p)

| Center<br>Number | Atomic<br>Number | Atomic<br>Type | Coordinates (Angstroms) |           |           |
|------------------|------------------|----------------|-------------------------|-----------|-----------|
|                  |                  |                | X                       | Y         | Z         |
| 1                | 6                | 0              | -1.379862               | -1.332161 | -0.000052 |
| 2                | 6                | 0              | -0.003278               | -1.133707 | -0.000057 |
| 3                | 6                | 0              | 0.509434                | 0.162799  | 0.000008  |
| 4                | 6                | 0              | -0.368448               | 1.244349  | 0.000078  |
| 5                | 6                | 0              | -1.739849               | 1.038712  | 0.000081  |
| 6                | 6                | 0              | -2.266403               | -0.255917 | 0.000016  |
| 7                | 1                | 0              | -1.762935               | -2.346210 | -0.000100 |
| 8                | 1                | 0              | 0.646570                | -1.997732 | -0.000110 |
| 9                | 1                | 0              | 0.039739                | 2.247304  | 0.000127  |
| 10               | 1                | 0              | -2.390987               | 1.901995  | 0.000133  |
| 11               | 6                | 0              | 2.773067                | -0.579453 | -0.000068 |
| 12               | 1                | 0              | 2.662221                | -1.216721 | -0.885066 |
| 13               | 1                | 0              | 2.662262                | -1.216819 | 0.884864  |
| 14               | 6                | 0              | 4.201429                | -0.074855 | -0.000073 |
| 15               | 8                | 0              | 5.137702                | -0.832531 | -0.000079 |
| 16               | 8                | 0              | 4.322670                | 1.261570  | -0.000092 |
| 17               | 1                | 0              | 5.274689                | 1.452598  | -0.000104 |
| 18               | 6                | 0              | -4.808646               | 0.986757  | 0.000191  |
| 19               | 1                | 0              | -5.878158               | 0.779335  | 0.000199  |
| 20               | 1                | 0              | -4.558293               | 1.554776  | 0.895789  |
| 21               | 1                | 0              | -4.558343               | 1.554958  | -0.895304 |
| 22               | 8                | 0              | 1.844776                | 0.477950  | 0.000010  |
| 23               | 16               | 0              | -4.005163               | -0.644284 | 0.000007  |

### Optimized coordinates for *transoid* radical cation 4-MeS-PhOCH<sub>2</sub>CO<sub>2</sub>H 4kt<sup>+</sup>

UB3LYP/6-311+G(2d,p)

| Center Number | Atomic Number | Atomic Type | Coordinates (Angstroms) |           |           |
|---------------|---------------|-------------|-------------------------|-----------|-----------|
|               |               |             | X                       | Y         | Z         |
| 1             | 6             | 0           | 1.385858                | -1.357814 | 0.000081  |
| 2             | 6             | 0           | 0.027150                | -1.189865 | 0.000100  |
| 3             | 6             | 0           | -0.507866               | 0.119989  | -0.000019 |
| 4             | 6             | 0           | 0.362027                | 1.244107  | -0.000156 |
| 5             | 6             | 0           | 1.716301                | 1.071322  | -0.000175 |
| 6             | 6             | 0           | 2.262621                | -0.236905 | -0.000056 |
| 7             | 1             | 0           | 1.801820                | -2.358327 | 0.000170  |
| 8             | 1             | 0           | -0.618545               | -2.056252 | 0.000201  |
| 9             | 1             | 0           | -0.082132               | 2.231165  | -0.000246 |
| 10            | 1             | 0           | 2.361387                | 1.938331  | -0.000289 |
| 11            | 6             | 0           | -2.793602               | -0.624262 | 0.000115  |
| 12            | 1             | 0           | -2.689633               | -1.245527 | 0.891724  |
| 13            | 1             | 0           | -2.689677               | -1.245711 | -0.891370 |
| 14            | 6             | 0           | -4.197726               | -0.041841 | 0.000090  |
| 15            | 8             | 0           | -5.147070               | -0.772276 | 0.000097  |
| 16            | 8             | 0           | -4.234031               | 1.293528  | 0.000087  |
| 17            | 1             | 0           | -5.168077               | 1.564866  | 0.000085  |
| 18            | 6             | 0           | 4.818777                | 0.973996  | -0.000061 |
| 19            | 1             | 0           | 5.874407                | 0.707094  | -0.000569 |
| 20            | 1             | 0           | 4.584746                | 1.539504  | -0.900486 |
| 21            | 1             | 0           | 4.585527                | 1.539108  | 0.900812  |
| 22            | 8             | 0           | -1.794931               | 0.411884  | -0.000014 |
| 23            | 16            | 0           | 3.937950                | -0.614482 | -0.000056 |

### Optimized coordinates for *cisoid* acid 4-MeS-PhOCH<sub>2</sub>CO<sub>2</sub>H 4kc

UB3LYP/6-311+G(2d,p)

| Center Number | Atomic Number | Atomic Type | Coordinates (Angstroms) |           |           |
|---------------|---------------|-------------|-------------------------|-----------|-----------|
|               |               |             | X                       | Y         | Z         |
| 1             | 6             | 0           | 1.545700                | -0.893620 | 0.000110  |
| 2             | 6             | 0           | 0.148604                | -0.863366 | 0.000090  |
| 3             | 6             | 0           | -0.519334               | 0.355131  | -0.000039 |
| 4             | 6             | 0           | 0.218165                | 1.542389  | -0.000157 |
| 5             | 6             | 0           | 1.598089                | 1.504664  | -0.000146 |
| 6             | 6             | 0           | 2.286037                | 0.282249  | -0.000008 |
| 7             | 1             | 0           | 2.034913                | -1.857897 | 0.000221  |
| 8             | 1             | 0           | -0.389572               | -1.801197 | 0.000178  |
| 9             | 1             | 0           | -0.312511               | 2.486161  | -0.000263 |
| 10            | 1             | 0           | 2.154215                | 2.435118  | -0.000247 |
| 11            | 6             | 0           | -2.672002               | -0.660324 | 0.000082  |
| 12            | 1             | 0           | -2.481416               | -1.278432 | 0.885109  |
| 13            | 1             | 0           | -2.481459               | -1.278638 | -0.884805 |
| 14            | 6             | 0           | -4.152232               | -0.338904 | 0.000093  |
| 15            | 8             | 0           | -4.985939               | -1.208267 | -0.000201 |
| 16            | 8             | 0           | -4.440128               | 0.971609  | 0.000214  |
| 17            | 1             | 0           | -5.408575               | 1.041814  | 0.000122  |
| 18            | 6             | 0           | 4.578437                | -1.373671 | -0.000042 |
| 19            | 1             | 0           | 5.667710                | -1.352306 | -0.000107 |
| 20            | 1             | 0           | 4.234654                | -1.890942 | 0.895478  |
| 21            | 1             | 0           | 4.234542                | -1.890898 | -0.895544 |
| 22            | 8             | 0           | -1.883076               | 0.504535  | -0.000066 |
| 23            | 16            | 0           | 4.064492                | 0.369807  | 0.000024  |

### Optimized coordinates for *cisoid* radical cation 4-MeS-PhOCH<sub>2</sub>CO<sub>2</sub>H 4kc<sup>+</sup>

UB3LYP/6-311+G(2d,p)

| Center Number | Atomic Number | Atomic Type | Coordinates (Angstroms) |           |           |
|---------------|---------------|-------------|-------------------------|-----------|-----------|
|               |               |             | X                       | Y         | Z         |
| 1             | 6             | 0           | 1.544866                | -0.942122 | 0.000045  |
| 2             | 6             | 0           | 0.173479                | -0.927575 | 0.000071  |
| 3             | 6             | 0           | -0.515701               | 0.310170  | 0.000011  |
| 4             | 6             | 0           | 0.212191                | 1.529248  | -0.000077 |
| 5             | 6             | 0           | 1.574237                | 1.509761  | -0.000104 |
| 6             | 6             | 0           | 2.277493                | 0.269862  | -0.000044 |

|    |    |   |           |           |           |
|----|----|---|-----------|-----------|-----------|
| 7  | 1  | 0 | 2.058266  | -1.893210 | 0.000096  |
| 8  | 1  | 0 | -0.368697 | -1.862453 | 0.000140  |
| 9  | 1  | 0 | -0.342749 | 2.458318  | -0.000122 |
| 10 | 1  | 0 | 2.129830  | 2.439762  | -0.000171 |
| 11 | 6  | 0 | -2.692427 | -0.711614 | 0.000107  |
| 12 | 1  | 0 | -2.513075 | -1.315222 | 0.891838  |
| 13 | 1  | 0 | -2.513090 | -1.315337 | -0.891549 |
| 14 | 6  | 0 | -4.157857 | -0.306691 | 0.000100  |
| 15 | 8  | 0 | -5.009572 | -1.149034 | -0.000116 |
| 16 | 8  | 0 | -4.358018 | 1.013679  | 0.000145  |
| 17 | 1  | 0 | -5.318203 | 1.169067  | 0.000060  |
| 18 | 6  | 0 | 4.626787  | -1.311348 | -0.000006 |
| 19 | 1  | 0 | 5.710192  | -1.202112 | -0.000114 |
| 20 | 1  | 0 | 4.313873  | -1.836293 | 0.900942  |
| 21 | 1  | 0 | 4.313710  | -1.836446 | -0.900806 |
| 22 | 8  | 0 | -1.828961 | 0.439427  | 0.000030  |
| 23 | 16 | 0 | 3.990246  | 0.390200  | -0.000088 |

### Optimized coordinates for acid $\text{PhNHCH}_2\text{CO}_2\text{H 4I}$

UB3LYP/aug-cc-pvtz

| Center Number | Atomic Number | Atomic Type | Coordinates (Angstroms) |           |           |
|---------------|---------------|-------------|-------------------------|-----------|-----------|
|               |               |             | X                       | Y         | Z         |
| 1             | 6             | 0           | 3.076646                | 1.073740  | 0.016759  |
| 2             | 6             | 0           | 1.710074                | 1.270341  | -0.075327 |
| 3             | 6             | 0           | 0.827916                | 0.178124  | -0.097868 |
| 4             | 6             | 0           | 1.365544                | -1.113070 | -0.021819 |
| 5             | 6             | 0           | 2.741925                | -1.296103 | 0.066815  |
| 6             | 6             | 0           | 3.608281                | -0.212622 | 0.087646  |
| 7             | 1             | 0           | 3.734382                | 1.932781  | 0.033297  |
| 8             | 1             | 0           | 1.310621                | 2.275358  | -0.136386 |
| 9             | 1             | 0           | 0.719392                | -1.978630 | -0.037078 |
| 10            | 1             | 0           | 3.133927                | -2.303157 | 0.122143  |
| 11            | 1             | 0           | 4.676196                | -0.362639 | 0.158291  |
| 12            | 7             | 0           | -0.535303               | 0.409427  | -0.227896 |
| 13            | 1             | 0           | -0.841503               | 1.340292  | -0.002158 |
| 14            | 6             | 0           | -1.504061               | -0.626661 | 0.027683  |
| 15            | 1             | 0           | -1.357153               | -1.116121 | 1.003130  |
| 16            | 1             | 0           | -1.445665               | -1.417560 | -0.722010 |
| 17            | 6             | 0           | -2.937283               | -0.144336 | 0.021824  |
| 18            | 8             | 0           | -3.887916               | -0.873141 | -0.071451 |
| 19            | 8             | 0           | -3.051991               | 1.196042  | 0.176278  |
| 20            | 1             | 0           | -3.998079               | 1.403998  | 0.183152  |

### Optimized coordinates for cation $\text{PhNHCH}_2\text{CO}_2\text{H 4I}^+$

UB3LYP/aug-cc-pvtz

| Center Number | Atomic Number | Atomic Type | Coordinates (Angstroms) |           |           |
|---------------|---------------|-------------|-------------------------|-----------|-----------|
|               |               |             | X                       | Y         | Z         |
| 1             | 6             | 0           | -3.030550               | 1.126637  | -0.000089 |
| 2             | 6             | 0           | -1.671153               | 1.286872  | 0.000058  |
| 3             | 6             | 0           | -0.818271               | 0.137660  | 0.000108  |
| 4             | 6             | 0           | -1.392081               | -1.168483 | -0.000010 |
| 5             | 6             | 0           | -2.755602               | -1.301518 | -0.000164 |
| 6             | 6             | 0           | -3.584848               | -0.164286 | -0.000187 |
| 7             | 1             | 0           | -3.678121               | 1.991381  | -0.000138 |
| 8             | 1             | 0           | -1.226951               | 2.273570  | 0.000115  |
| 9             | 1             | 0           | -0.758403               | -2.042524 | 0.000022  |
| 10            | 1             | 0           | -3.199718               | -2.286529 | -0.000286 |
| 11            | 1             | 0           | -4.658836               | -0.286667 | -0.000270 |
| 12            | 7             | 0           | 0.504903                | 0.329915  | 0.000336  |
| 13            | 1             | 0           | 0.851130                | 1.283860  | 0.000470  |
| 14            | 6             | 0           | 1.539326                | -0.695488 | 0.000511  |
| 15            | 1             | 0           | 1.444801                | -1.333810 | -0.880202 |

|    |   |   |          |           |           |
|----|---|---|----------|-----------|-----------|
| 16 | 1 | 0 | 1.445234 | -1.333044 | 0.881840  |
| 17 | 6 | 0 | 2.950456 | -0.121896 | -0.000079 |
| 18 | 8 | 0 | 3.918137 | -0.817060 | -0.000374 |
| 19 | 8 | 0 | 2.951094 | 1.227439  | -0.000163 |
| 20 | 1 | 0 | 3.869033 | 1.544342  | -0.000500 |

---



## DFT Optimised Energies

### Acid PhOCH<sub>2</sub>CO<sub>2</sub>H (4a).

UB3LYP/6-311+G(2d,p): E = -535.50894310 AU

UB3LYP/aug-cc-pvtz: E = -535.5474946

UB3LYP/aug-cc-pvtz CPCM (solvent = acetonitrile): E = -535.5577593

### Cation PhOCH<sub>2</sub>CO<sub>2</sub>H (4a<sup>+</sup>).

UB3LYP/6-311+G(2d,p): E = -535.20722747 AU

UB3LYP/aug-cc-pvtz: E = -535.2455421

UB3LYP/aug-cc-pvtz CPCM (solvent = acetonitrile): E = -535.3267171

### Acid 4-MePhOCH<sub>2</sub>CO<sub>2</sub>H (4b).

UB3LYP/6-311+G(2d,p): E = -574.83709304 AU

UB3LYP/aug-cc-pvtz: E = -574.878329

UB3LYP/aug-cc-pvtz CPCM (solvent = acetonitrile): E = -574.8885358

### Cation 4-MePhOCH<sub>2</sub>CO<sub>2</sub>H (4b<sup>+</sup>).

UB3LYP/6-311+G(2d,p): E = -574.54764345 AU

UB3LYP/aug-cc-pvtz: E = -574.5888231

UB3LYP/aug-cc-pvtz CPCM (solvent = acetonitrile): E = -574.6669601

### Acid 4-t-BuPhOCH<sub>2</sub>CO<sub>2</sub>H (4c).

UB3LYP/6-311+G(2d,p): E = -692.80775208 AU

UB3LYP/aug-cc-pvtz: E = -692.8575113

UB3LYP/aug-cc-pvtz CPCM (solvent = acetonitrile): E = -692.8678447

### Cation 4-t-BuPhOCH<sub>2</sub>CO<sub>2</sub>H (4c<sup>+</sup>).

UB3LYP/6-311+G(2d,p): E = -692.52231987 AU

UB3LYP/aug-cc-pvtz: E = -692.5720663

UB3LYP/aug-cc-pvtz CPCM (solvent = acetonitrile): E = -692.646069

**Acid 4-MeOPhOCH<sub>2</sub>CO<sub>2</sub>H *cis* (4d<sub>c</sub>).**

UB3LYP/6-311+G(2d,p): E = -650.06645741 AU

UB3LYP/aug-cc-pvtz: E = -650.1132596

UB3LYP/aug-cc-pvtz CPCM (solvent = acetonitrile): E = -650.1251373

**Cation 4-MeOPhOCH<sub>2</sub>CO<sub>2</sub>H *cis* (4d<sub>c</sub><sup>+</sup>).**

UB3LYP/6-311+G(2d,p): E = -650.06645741 AU

UB3LYP/aug-cc-pvtz: E = -649.8396988

UB3LYP/aug-cc-pvtz CPCM (solvent = acetonitrile): E = -649.9169588

**Acid 4-MeOPhOCH<sub>2</sub>CO<sub>2</sub>H *trans* (4d<sub>t</sub>).**

UB3LYP/6-311+G(2d,p): E = -650.06606387 AU

UB3LYP/aug-cc-pvtz: E = -650.1128708

UB3LYP/aug-cc-pvtz CPCM (solvent = acetonitrile): E = -649.8403027

**Cation 4-MeOPhOCH<sub>2</sub>CO<sub>2</sub>H *trans* (4d<sub>t</sub><sup>+</sup>).**

UB3LYP/6-311+G(2d,p): E = -650.06606387 AU

UB3LYP/aug-cc-pvtz: E = -650.1247972

UB3LYP/aug-cc-pvtz CPCM (solvent = acetonitrile): E = -649.9172627

**Acid 3-MeOPhOCH<sub>2</sub>CO<sub>2</sub>H (4e).**

UB3LYP/6-311+G(2d,p): E = -650.06917168 AU

UB3LYP/aug-cc-pvtz: E = -650.1160242

UB3LYP/aug-cc-pvtz CPCM (solvent = acetonitrile): E = -650.1277081

**Cation 3-MeOPhOCH<sub>2</sub>CO<sub>2</sub>H (4e<sup>+</sup>).**

UB3LYP/6-311+G(2d,p): E = -649.78265669 AU

UB3LYP/aug-cc-pvtz: E = -649.8293864

UB3LYP/aug-cc-pvtz CPCM (solvent = acetonitrile): E = -649.9068673

**Acid 2-MeOPhOCH<sub>2</sub>CO<sub>2</sub>H (4f).**

UB3LYP/6-311+G(2d,p): E = -650.05904354 AU

UB3LYP/aug-cc-pvtz: E = -650.1057583

UB3LYP/aug-cc-pvtz CPCM (solvent = acetonitrile): E = -650.116515

**Cation 2-MeOPhOCH<sub>2</sub>CO<sub>2</sub>H (4f<sup>+</sup>).**

UB3LYP/6-311+G(2d,p): E = -649.78110303 AU

UB3LYP/aug-cc-pvtz: E = -649.8277148

UB3LYP/aug-cc-pvtz CPCM (solvent = acetonitrile): E = -649.9046441

**Acid 3,5-DiMeOPhOCH<sub>2</sub>CO<sub>2</sub>H (4g).**

UB3LYP/6-311+G(2d,p): E = -764.62806667 AU

UB3LYP/aug-cc-pvtz: E = -764.68494407 AU

UB3LYP/aug-cc-pvtz CPCM (solvent = acetonitrile): E = -764.6978636 AU

**Cation 3,5-DiMeOPhOCH<sub>2</sub>CO<sub>2</sub>H (4g<sup>+</sup>).**

UB3LYP/6-311+G(2d,p): E = -764.35033790 AU

UB3LYP/aug-cc-pvtz: E = -764.4023231 AU

UB3LYP/aug-cc-pvtz CPCM (solvent = acetonitrile): E = -764.4771956

**Acid 3,4,5-TriMeOPhOCH<sub>2</sub>CO<sub>2</sub>H *cis* (4h<sub>c</sub>).**

UB3LYP/6-311+G(2d,p): E = -878.907662

UB3LYP/aug-cc-pvtz: E = -879.2317218 AU

UB3LYP/aug-cc-pvtz CPCM (solvent = acetonitrile): E = -879.2469809

**Cation 3,4,5-TriMeO-PhOCH<sub>2</sub>CO<sub>2</sub>H *cis* (4h<sub>c</sub><sup>+</sup>).**

UB3LYP/6-311+G(2d,p): E = -878.659239

UB3LYP/aug-cc-pvtz: E = -878.9853928 AU

UB3LYP/aug-cc-pvtz CPCM (solvent = acetonitrile): E = -879.0569931 AU

**Acid 3,4,5-TriMeOPhOCH<sub>2</sub>CO<sub>2</sub>H *trans* (4h<sub>t</sub>).**

UB3LYP/6-311+G(2d,p): E = -879.16840878 AU

UB3LYP/aug-cc-pvtz: E = -879.2375054 AU

UB3LYP/aug-cc-pvtz CPCM (solvent = acetonitrile): E = -879.2536305 AU

**Cation 3,4,5-TriMeO-PhOCH<sub>2</sub>CO<sub>2</sub>H *trans* (4h<sub>t</sub><sup>+</sup>).**

UB3LYP/6-311+G(2d,p): E = -878.92198901 AU

UB3LYP/aug-cc-pvtz: E = -878.9861185 AU

UB3LYP/aug-cc-pvtz CPCM (solvent = acetonitrile): E = -879.0571986 AU

**Acid PhSCH<sub>2</sub>CO<sub>2</sub>H (4i).**

UB3LYP/6-311+G(2d,p): E = -858.48749778 AU

UB3LYP/aug-cc-pvtz: E = -858.5270246

UB3LYP/aug-cc-pvtz CPCM (solvent = acetonitrile): E = -858.537174

**Cation PhSCH<sub>2</sub>CO<sub>2</sub>H (4i<sup>+</sup>).**

UB3LYP/6-311+G(2d,p): E = -858.19958129 AU

UB3LYP/aug-cc-pvtz: E = -858.2388601

UB3LYP/aug-cc-pvtz CPCM (solvent = acetonitrile): E = -858.3171062

**Acid 4-MeOPhSCH<sub>2</sub>CO<sub>2</sub>H *cis* (4j<sub>c</sub>).**

UB3LYP/aug-cc-pvtz: E = -973.096988 AU

UB3LYP/aug-cc-pvtz CPCM (solvent = acetonitrile): E = -973.1093324 AU

**Cation 4-MeOPhSCH<sub>2</sub>CO<sub>2</sub>H *cis* (4j<sub>c</sub><sup>+</sup>).**

UB3LYP/aug-cc-pvtz: E = -972.8298526 AU

UB3LYP/aug-cc-pvtz CPCM (solvent = acetonitrile): E = -972.9061419 AU

**Acid 4-MeOPhSCH<sub>2</sub>CO<sub>2</sub>H *trans* (4j<sub>t</sub>).**

UB3LYP/6-311+G(2d,p): E = -973.04601836 AU

UB3LYP/aug-cc-pvtz: E = -973.09362539 AU

UB3LYP/aug-cc-pvtz CPCM (solvent = acetonitrile): E = -973.10554888 AU

**Cation 4-MeOPhSCH<sub>2</sub>CO<sub>2</sub>H *trans* (4j<sub>t</sub><sup>+</sup>).**

UB3LYP/6-311+G(2d,p): E = -972.77988485 AU

UB3LYP/aug-cc-pvtz: E = -972.82811764 AU

UB3LYP/aug-cc-pvtz CPCM (solvent = acetonitrile): E = -972.90225631 AU

**Acid 4-MeSPhOCH<sub>2</sub>CO<sub>2</sub>H *cis* (4k<sub>c</sub>).**

UB3LYP/6-311+G(2d,p): E = -973.04915177 AU

UB3LYP/aug-cc-pvtz: E = -973.096988 AU

UB3LYP/aug-cc-pvtz CPCM (solvent = acetonitrile): E = -973.1093324 AU

**Cation 4-MeSPhOCH<sub>2</sub>CO<sub>2</sub>H *cis* (4k<sub>c</sub><sup>+</sup>).**

UB3LYP/6-311+G(2d,p): E = -972.78213124 AU

UB3LYP/aug-cc-pvtz: E = -972.8298535 AU

UB3LYP/aug-cc-pvtz CPCM (solvent = acetonitrile): E = -972.9061423 AU

**Acid 4-MeSPhOCH<sub>2</sub>CO<sub>2</sub>H *trans* (4k<sub>t</sub>).**

UB3LYP/6-311+G(2d,p): E = -973.04890294 AU

UB3LYP/aug-cc-pvtz: E = -973.0967375 AU

UB3LYP/aug-cc-pvtz CPCM (solvent = acetonitrile): E = -973.1090995 AU

**Cation 4-MeSPhOCH<sub>2</sub>CO<sub>2</sub>H *trans* (4k<sub>t</sub><sup>+</sup>).**

UB3LYP/6-311+G(2d,p): E = -972.78259053 AU

UB3LYP/aug-cc-pvtz: E = -972.8303133 AU

UB3LYP/aug-cc-pvtz CPCM (solvent = acetonitrile): E = -972.9061423 AU

**Acid PhNHCH<sub>2</sub>CO<sub>2</sub>H (4I).**

UB3LYP/aug-cc-pvtz: E = -515.6816366 AU

UB3LYP/aug-cc-pvtz CPCM (solvent = acetonitrile): E = -515.6915143 AU

**Cation PhNHCH<sub>2</sub>CO<sub>2</sub>H (4I<sup>+</sup>).**

UB3LYP/aug-cc-pvtz: E = -515.4099793 AU

UB3LYP/aug-cc-pvtz CPCM (solvent = acetonitrile): E = -515.4898162 AU

## References

1. Morimoto, M.; Fukumoto, H.; Nozoe T.; Hagiwara, A.; Komai, K., *J. Agric. Food Chem.* **2007**, *55*, 700-705
2. Cabiddu, S.; Fattuoni, C.; Floris, C.; Gelli, G.; Melis, S., *Tetrahedron* **1993** *49*, 4965-4974.
3. Manley, D. W.; McBurney, R. T.; Miller, P.; Howe, R.I F.; Rhydderch, S.; Walton, J. C., *J. Am. Chem. Soc.* **2012**, *134*(33), 13580-13583.

# $^1\text{H}$ and $^{13}\text{C}$ NMR spectra of novel compounds

## 4-(methylthio)phenoxyacetic acid 4k

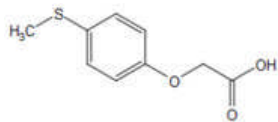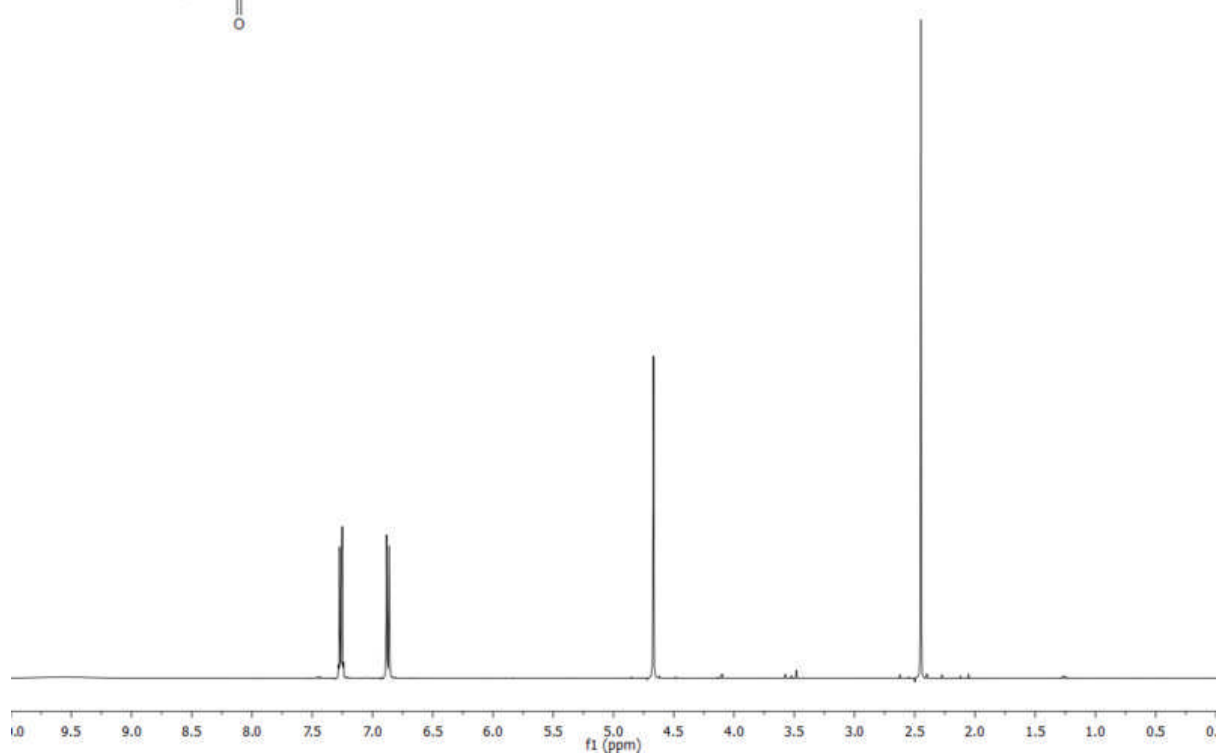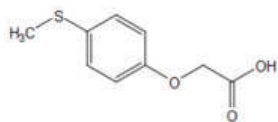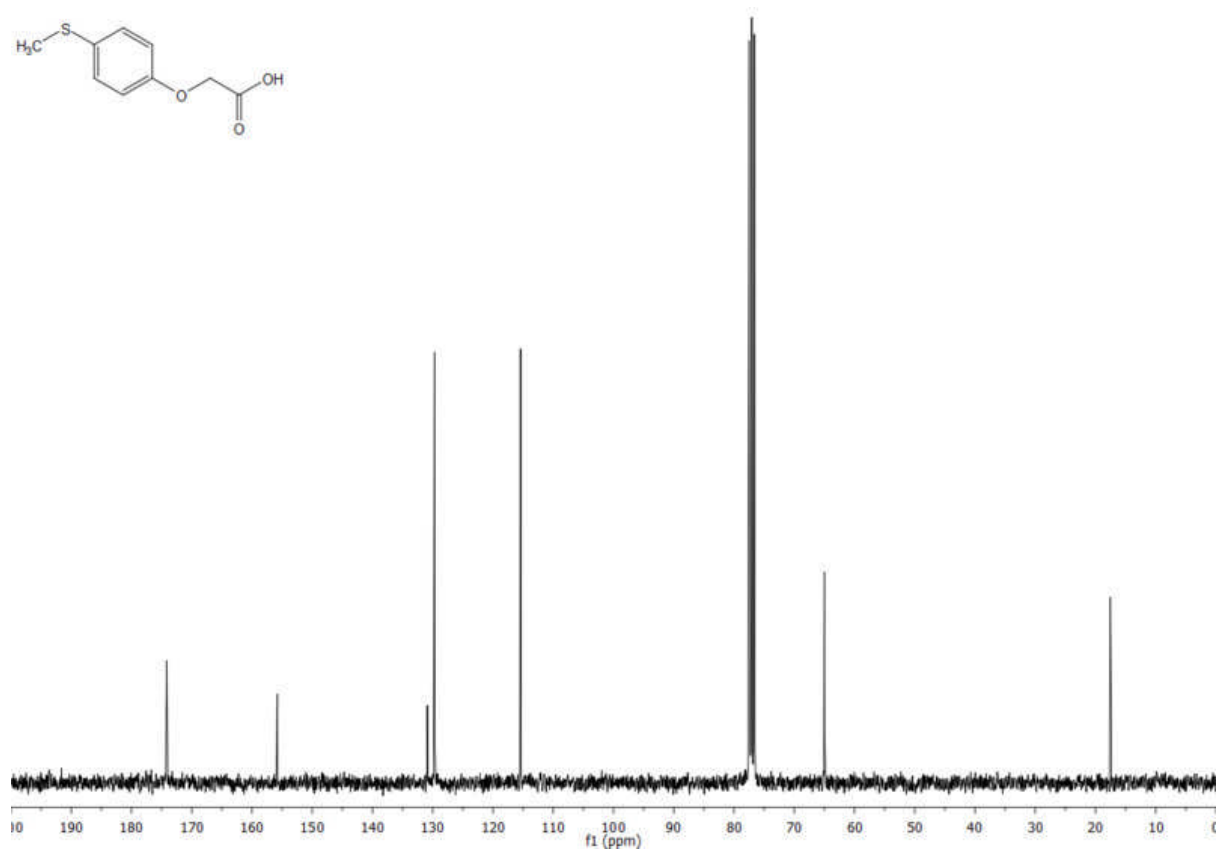



8-methyl-3a,4-dihydrochromeno[3,4-c]pyrrole-1,3(2H,9bH)-dione 5b

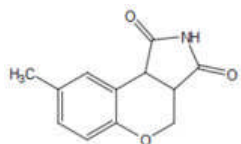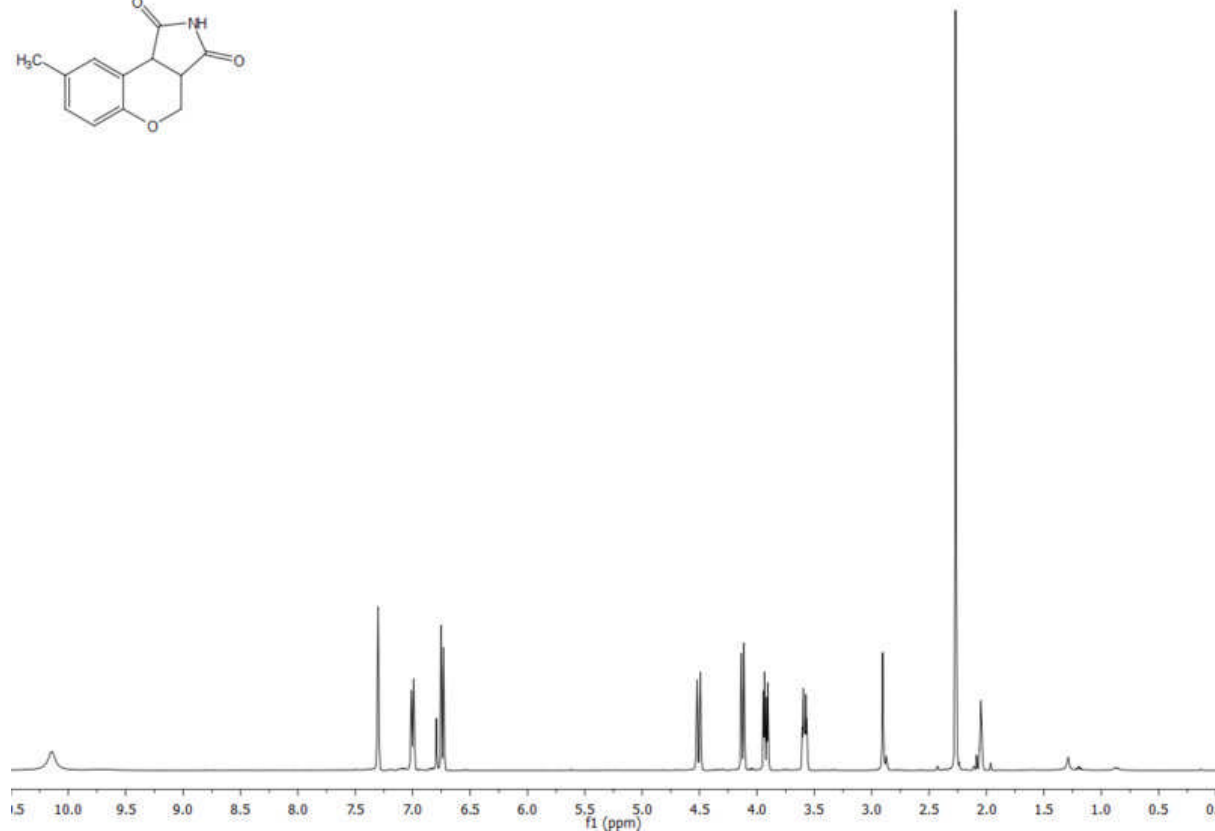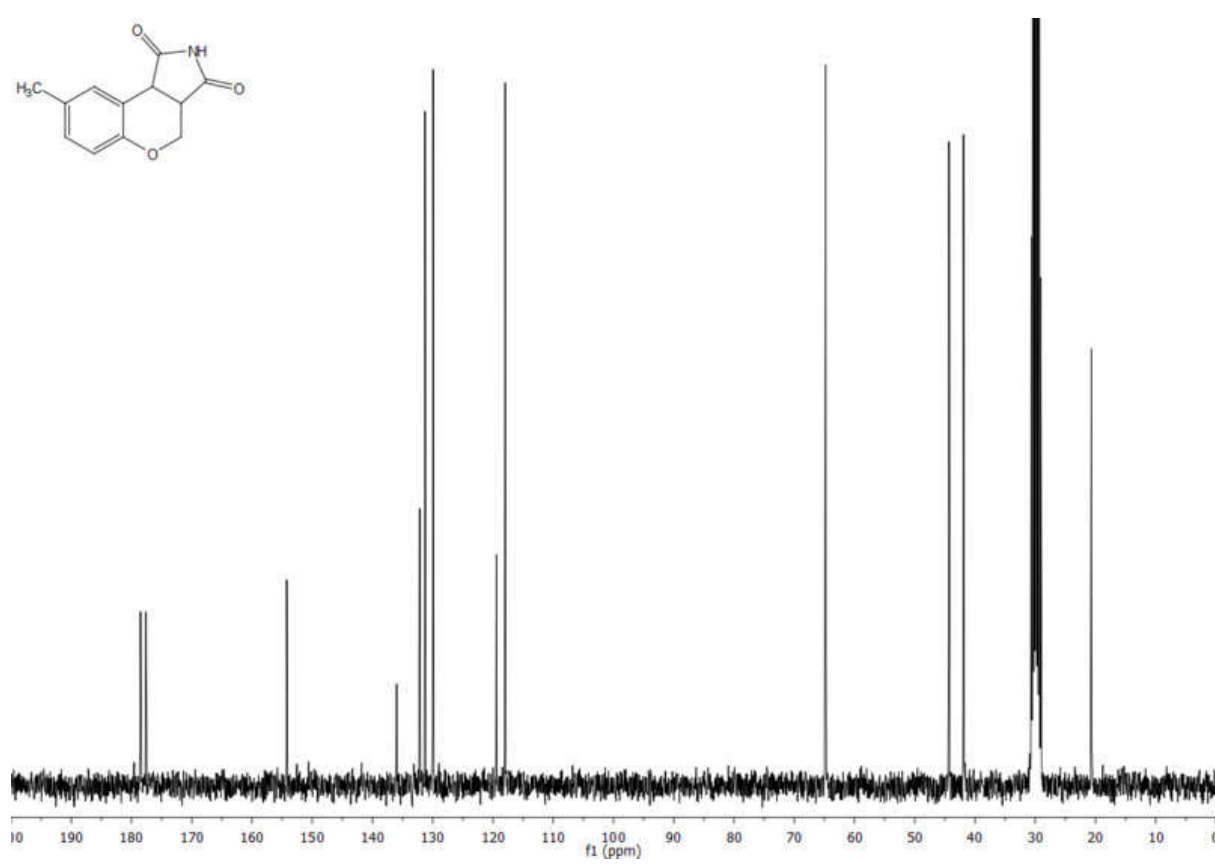

**8-(*tert*-butyl)-3a,4-dihydrochromeno[3,4-*c*]pyrrole-1,3(2*H*,9*bH*)-dione 5c**

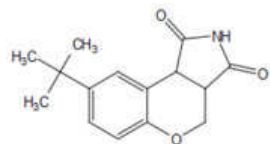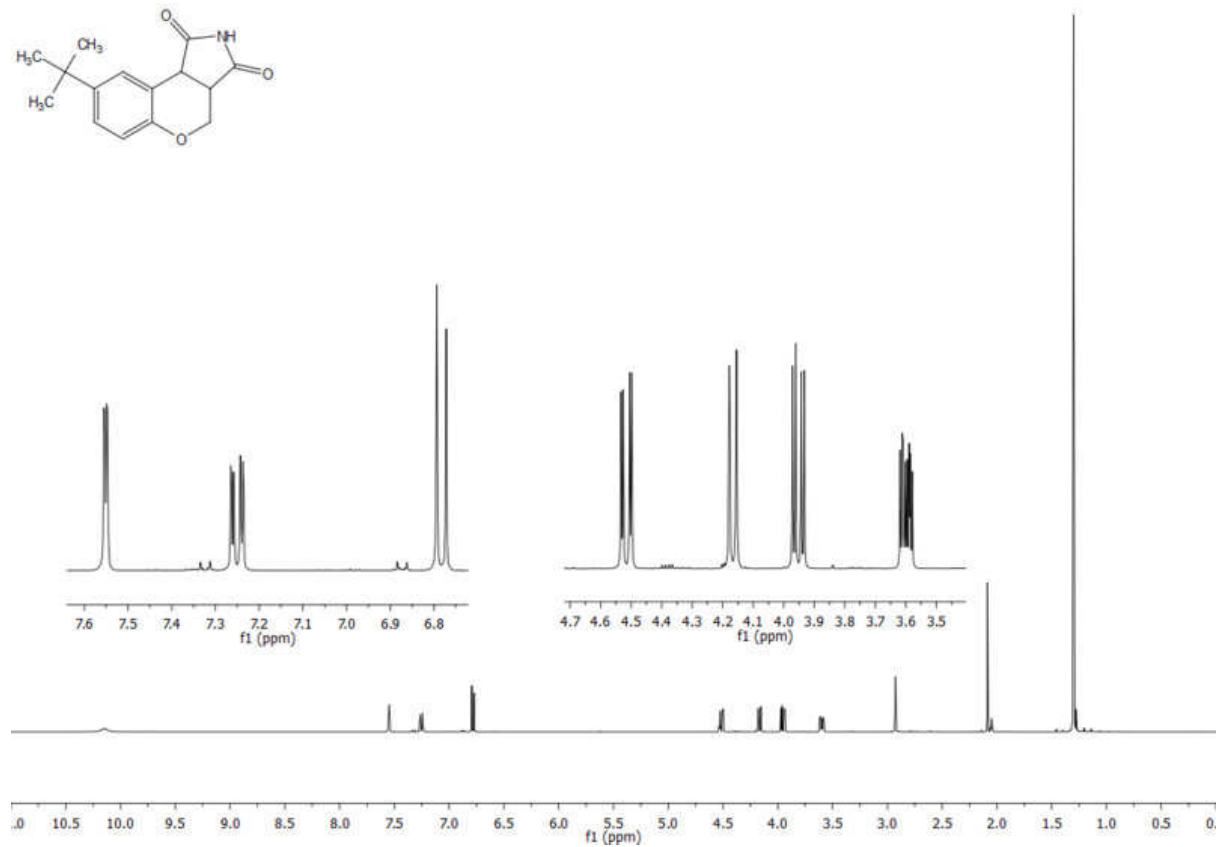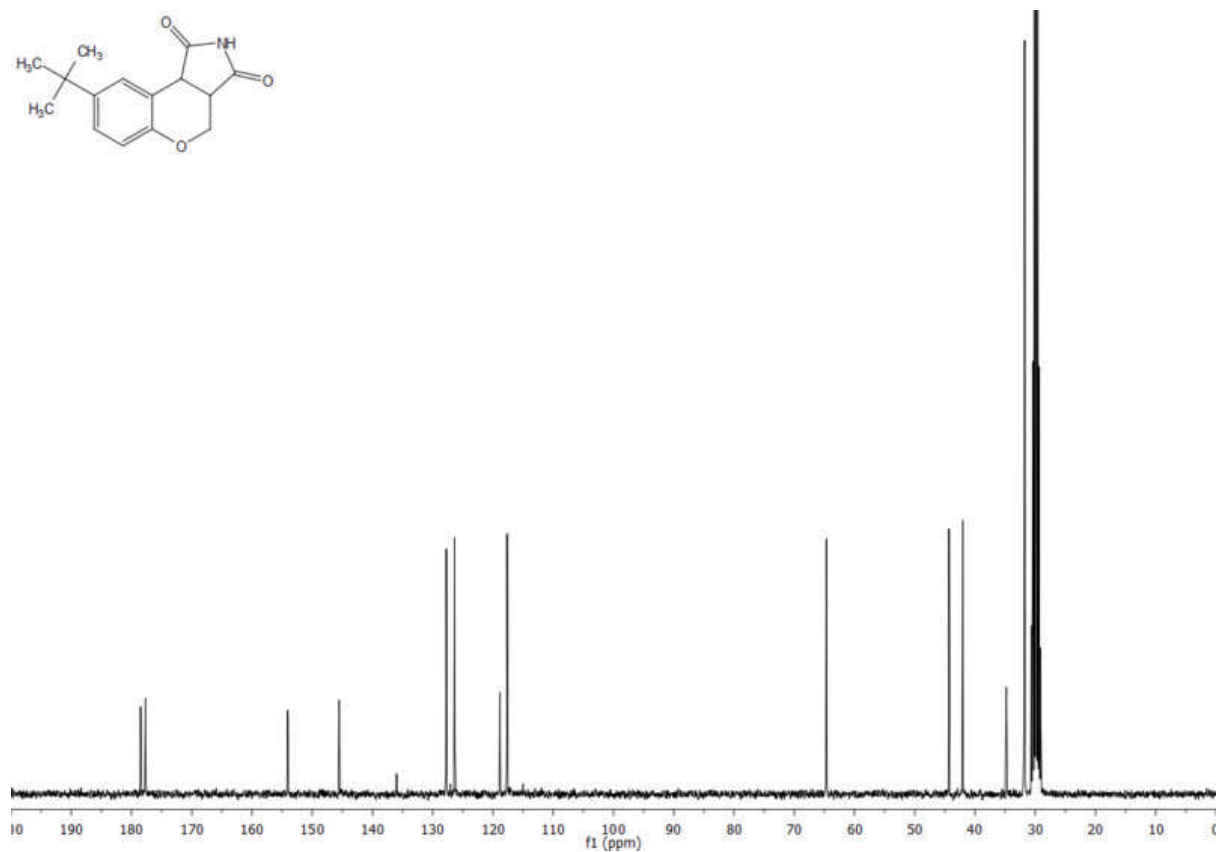

**8-methoxy-3a,4-dihydrochromeno[3,4-c]pyrrole-1,3(2H,9bH)-dione 5d**

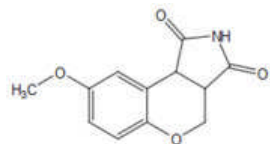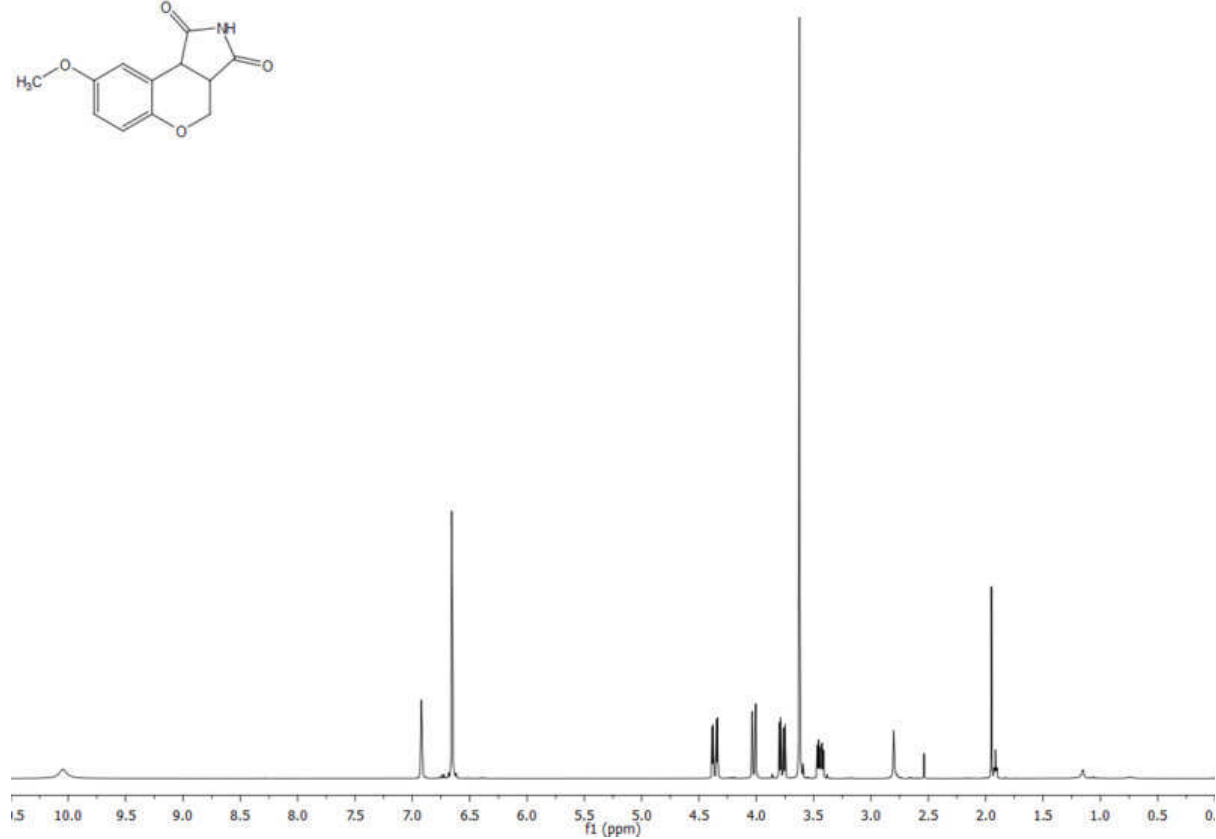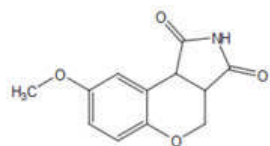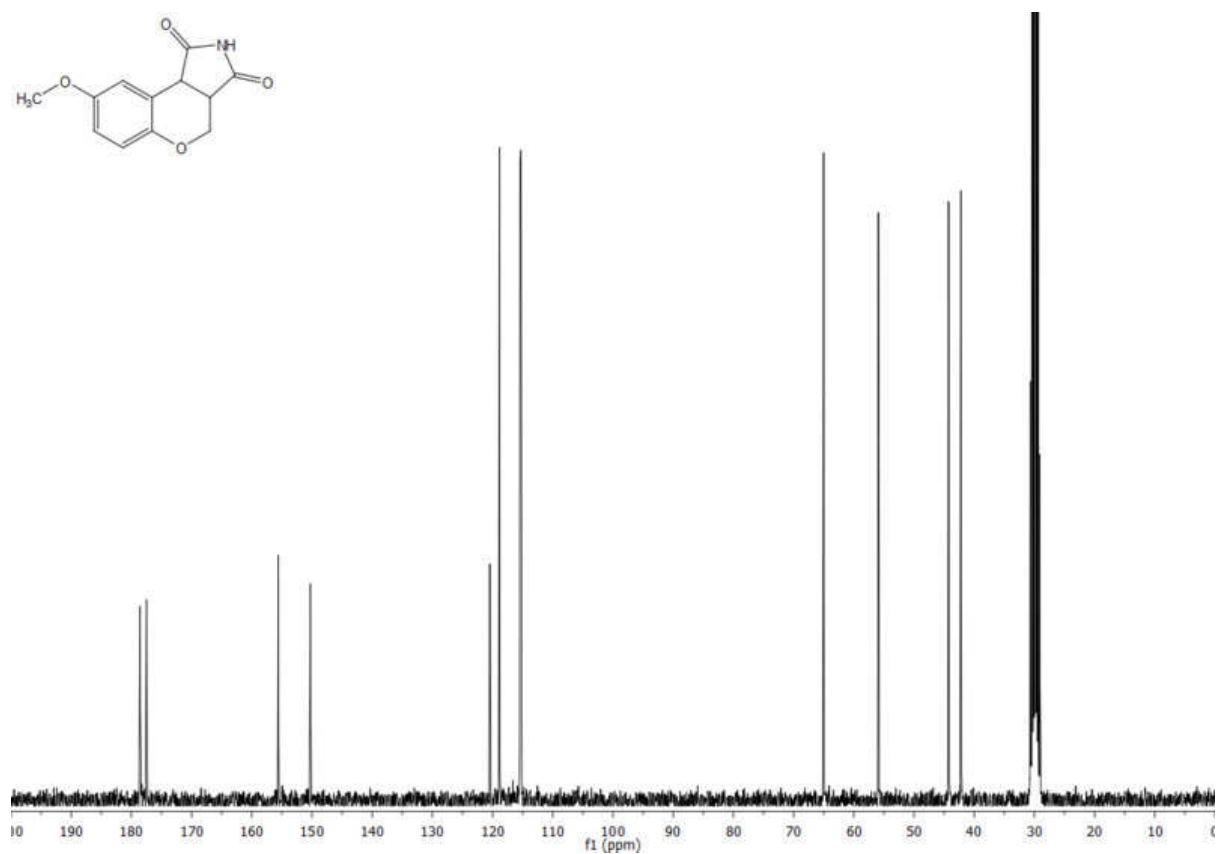

7-methoxy-3a,4-dihydrochromeno[3,4-c]pyrrole-1,3(2H,9bH)-dione 5e

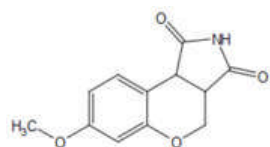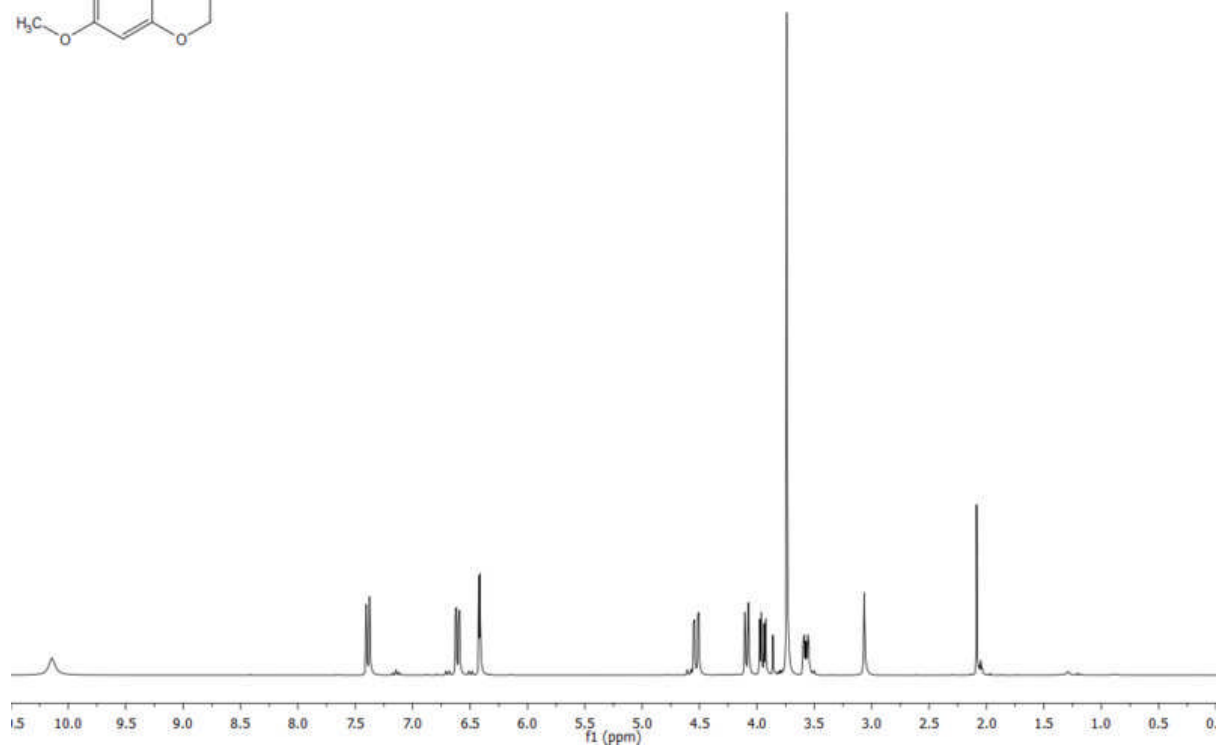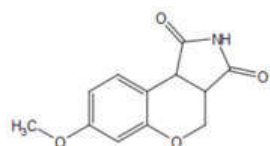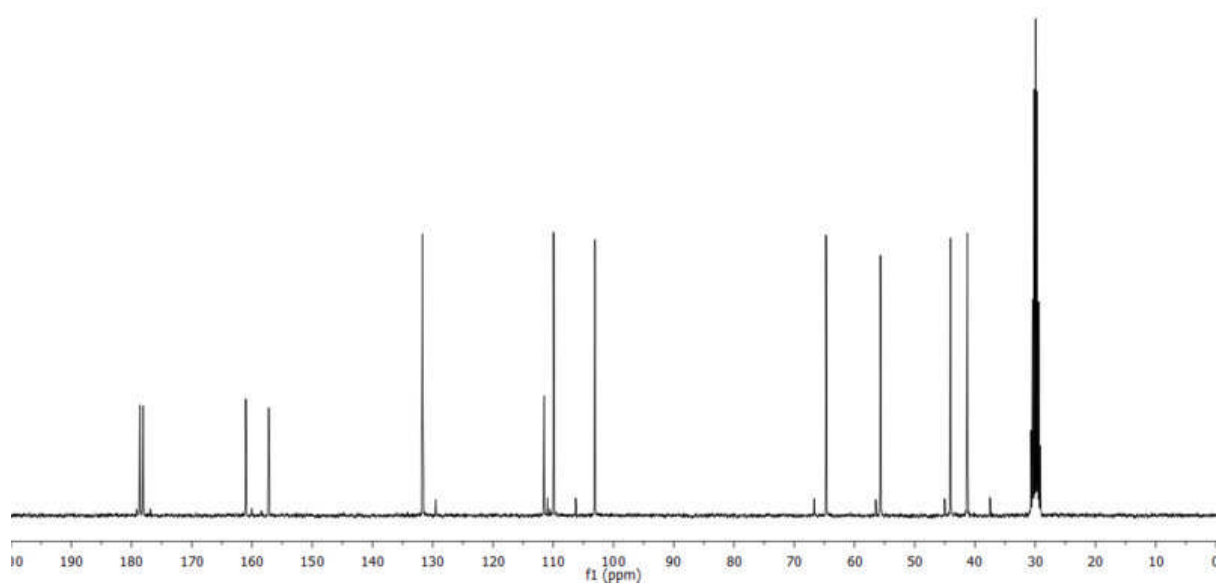

**9-methoxy-3a,4-dihydrochromeno[3,4-c]pyrrole-1,3(2H,9bH)-dione 5e'**

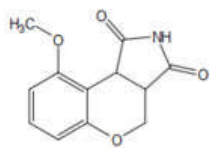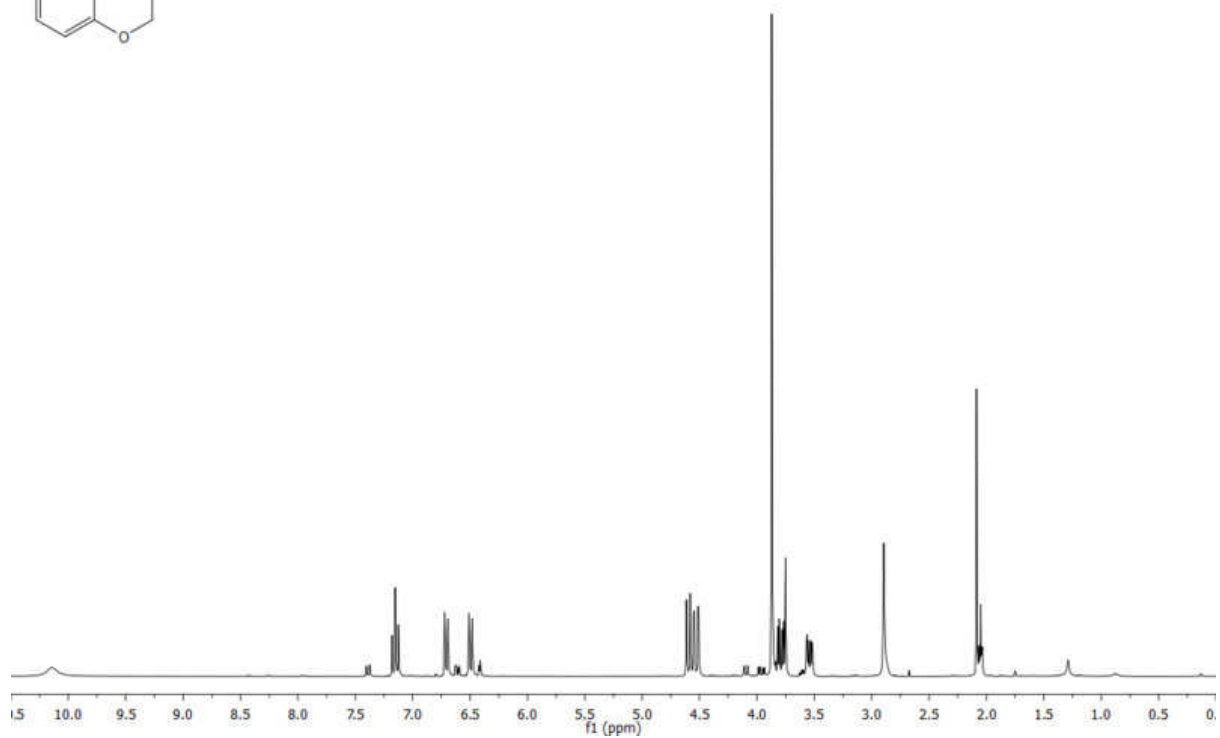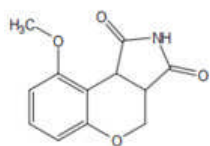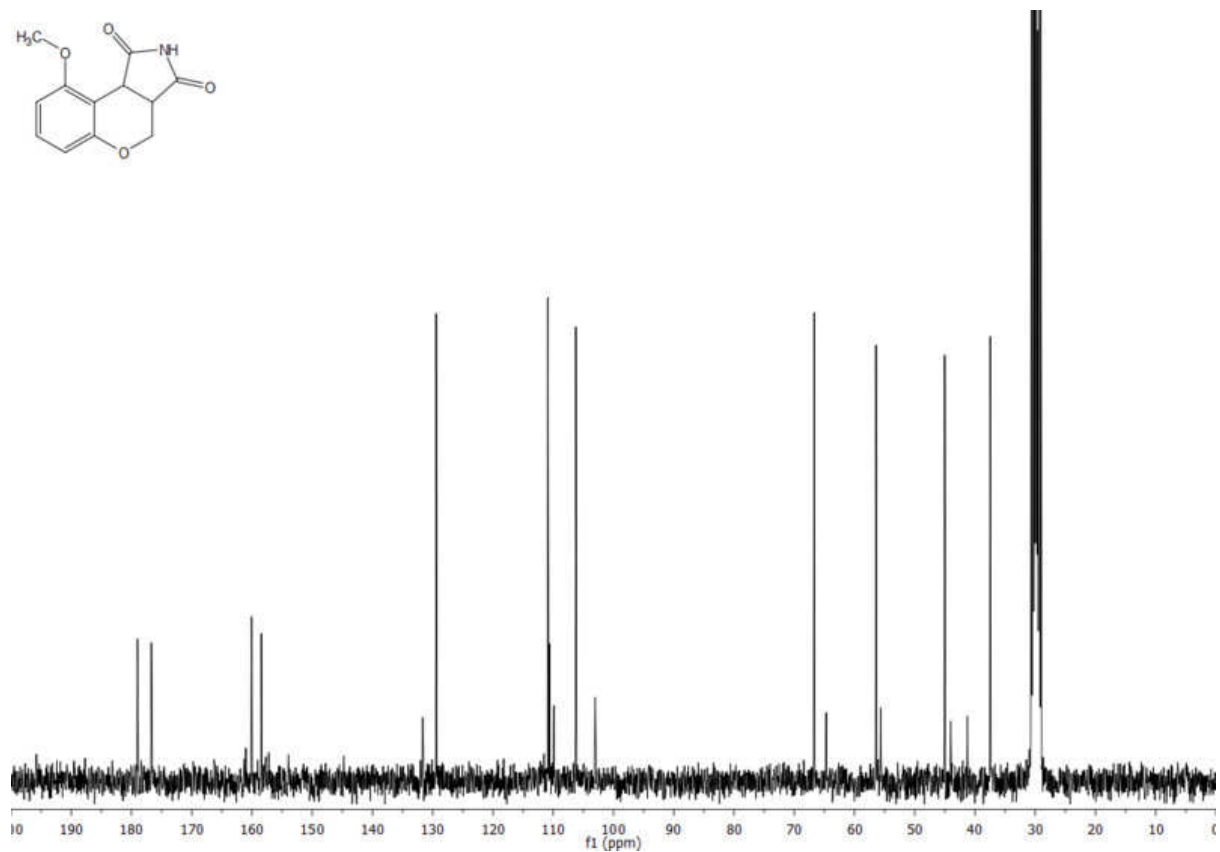

7,9-dimethoxy-3a,4-dihydrochromeno[3,4-c]pyrrole-1,3(2H,9bH)-dione 5g

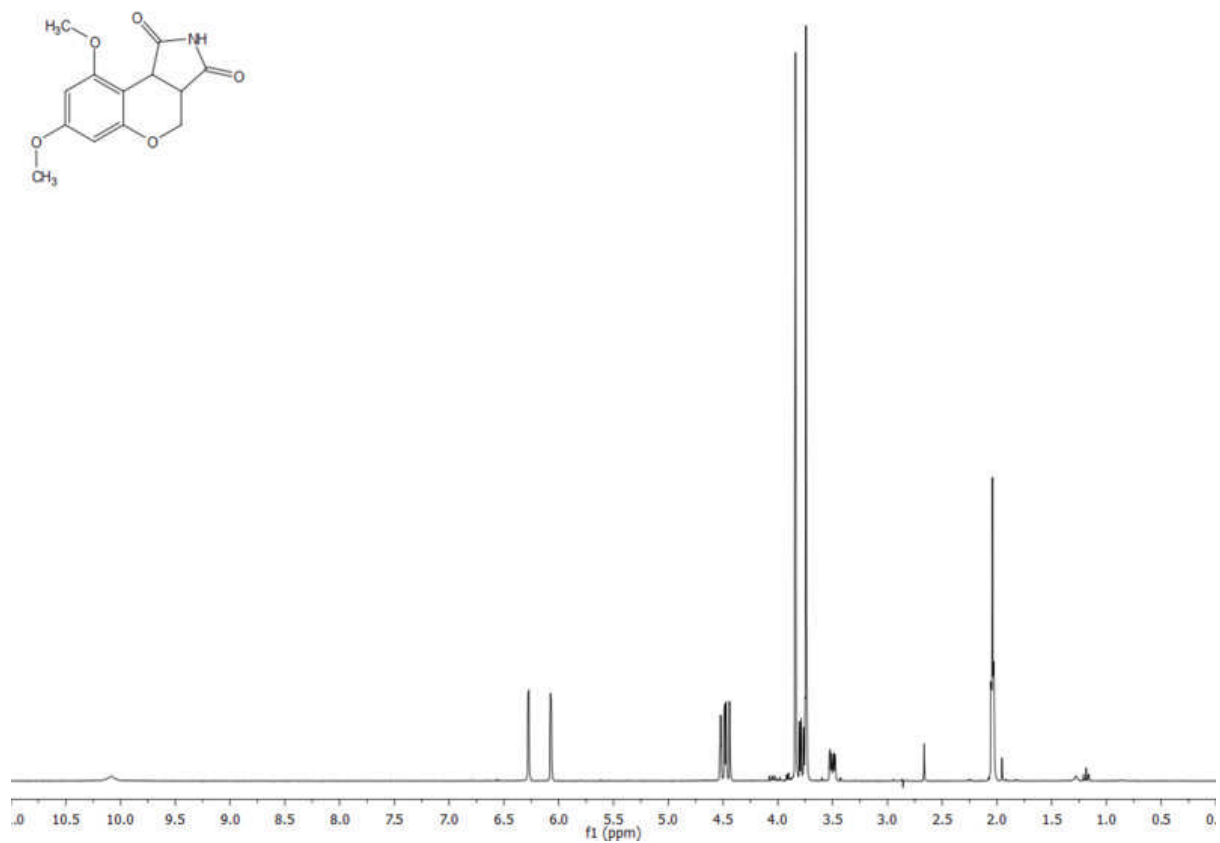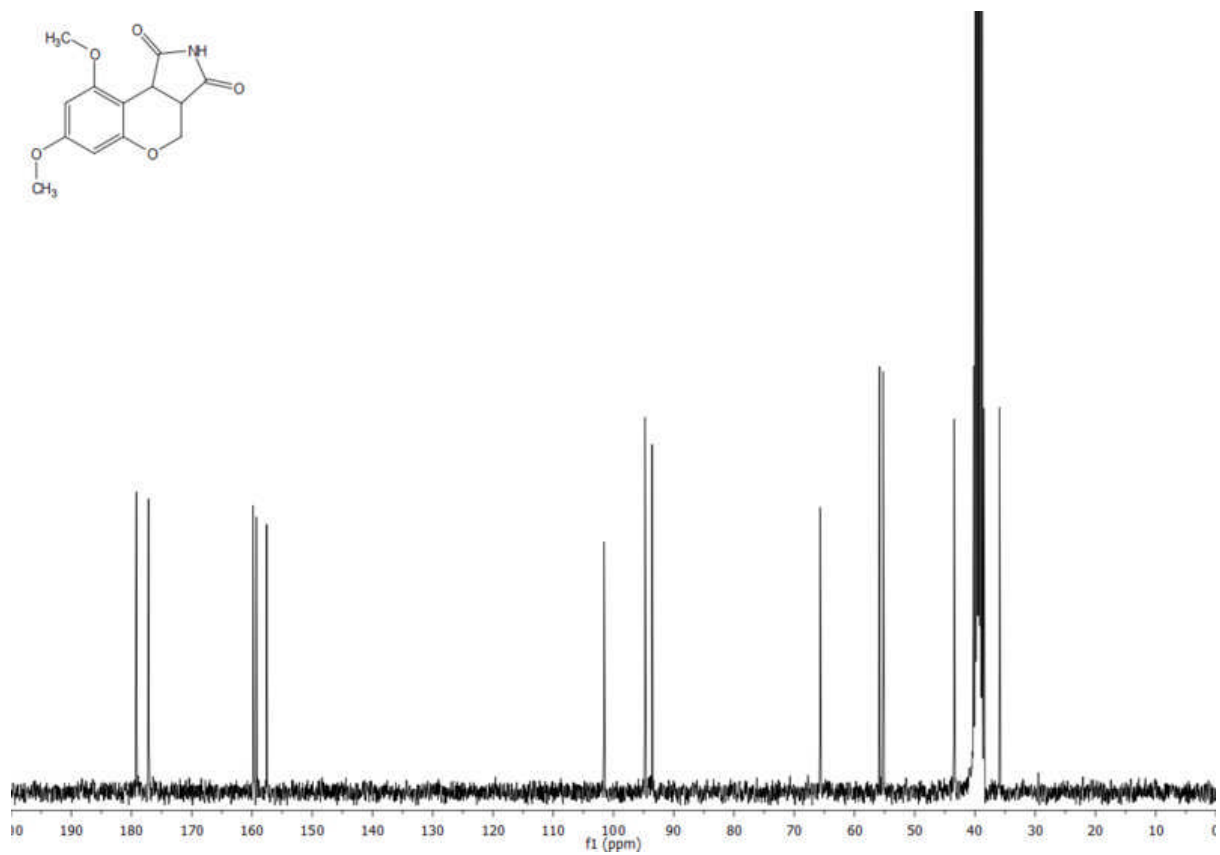

7,8,9-trimethoxy-3a,4-dihydrochromeno[3,4-c]pyrrole-1,3(2H,9bH)-dione 5h

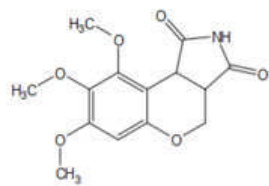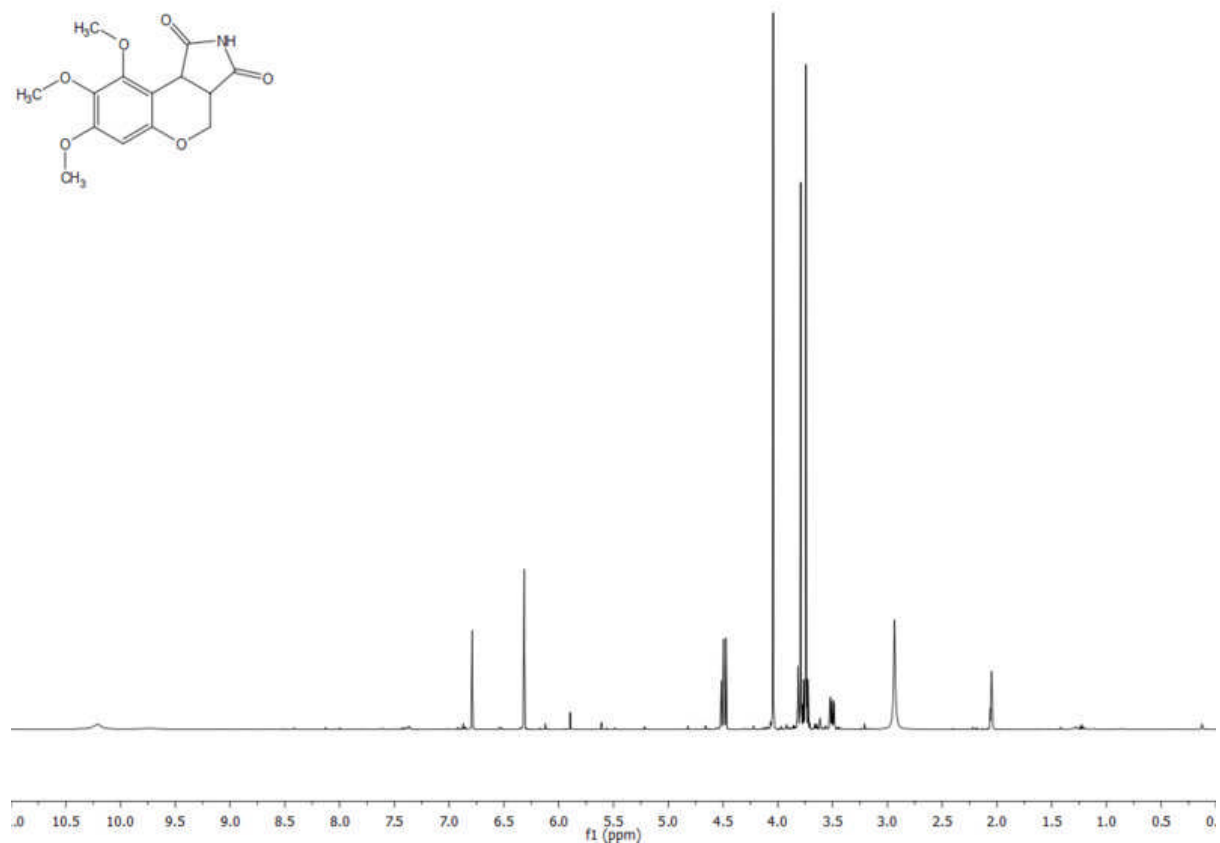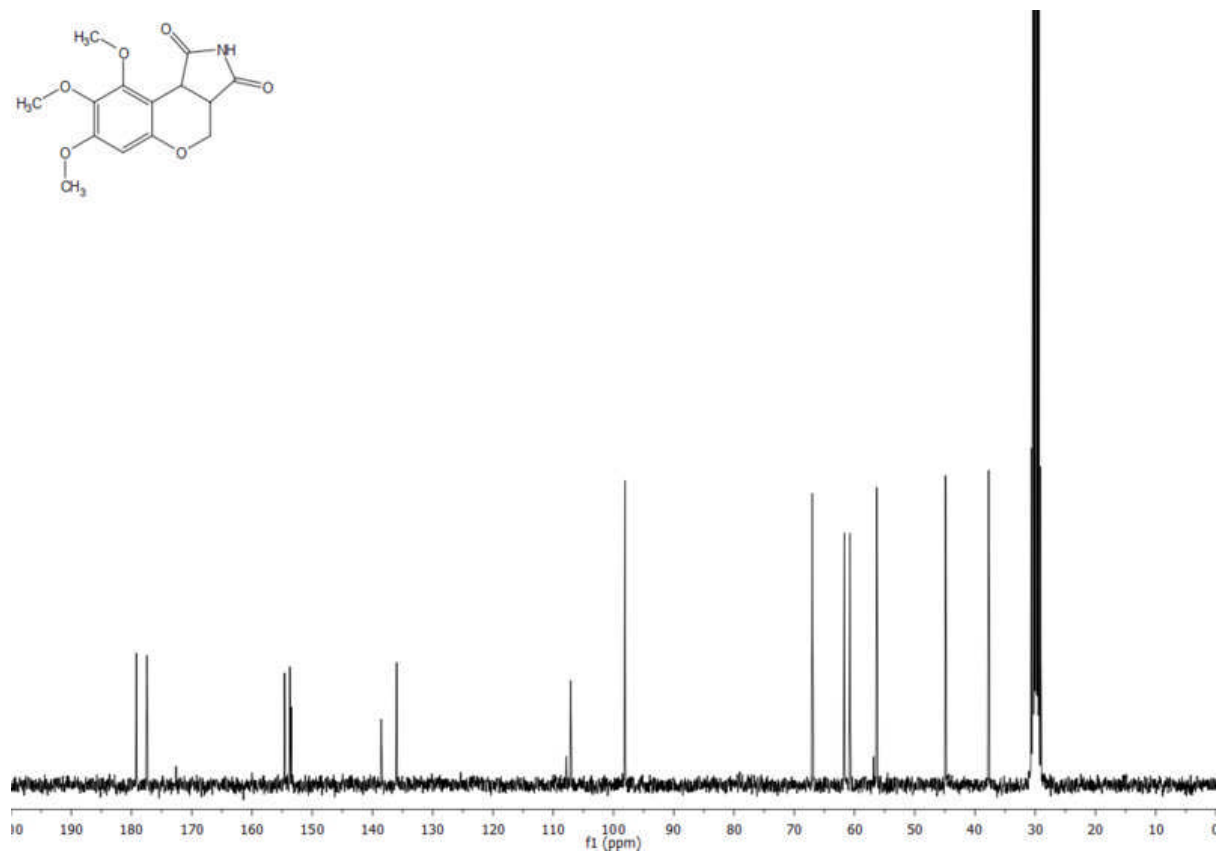

**3a,4-dihydrothiochromeno[3,4-c]pyrrole-1,3(2H,9bH)-dione 5i**

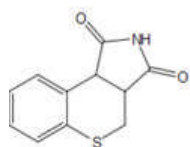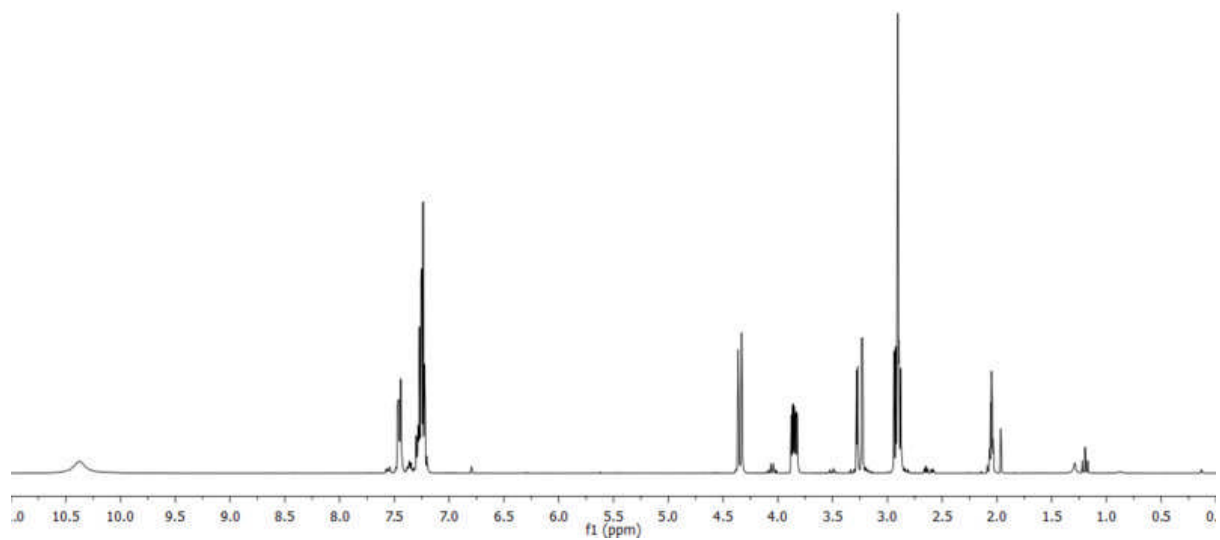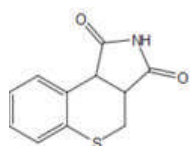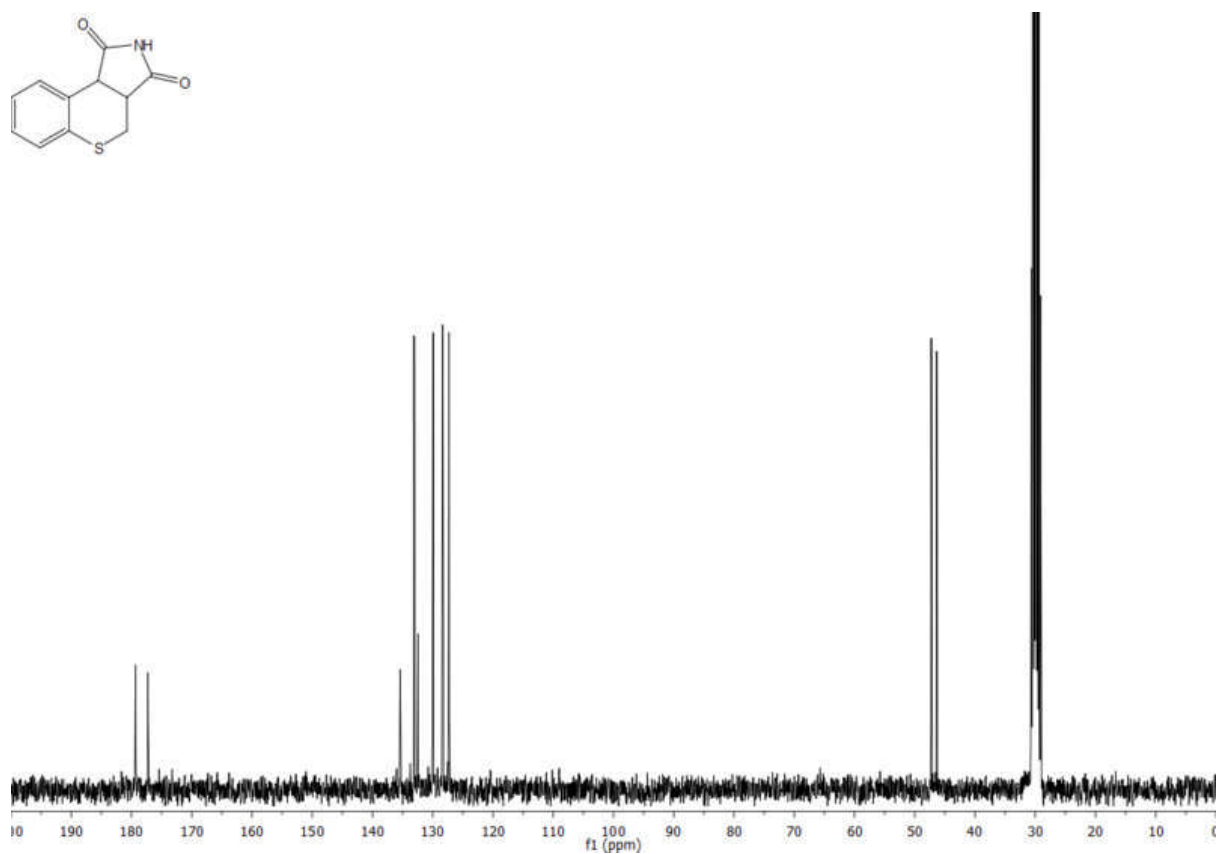



8-methoxy-3a,4-dihydrothiochromeno[3,4-c]pyrrole-1,3(2H,9bH)-dione 5j

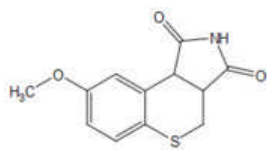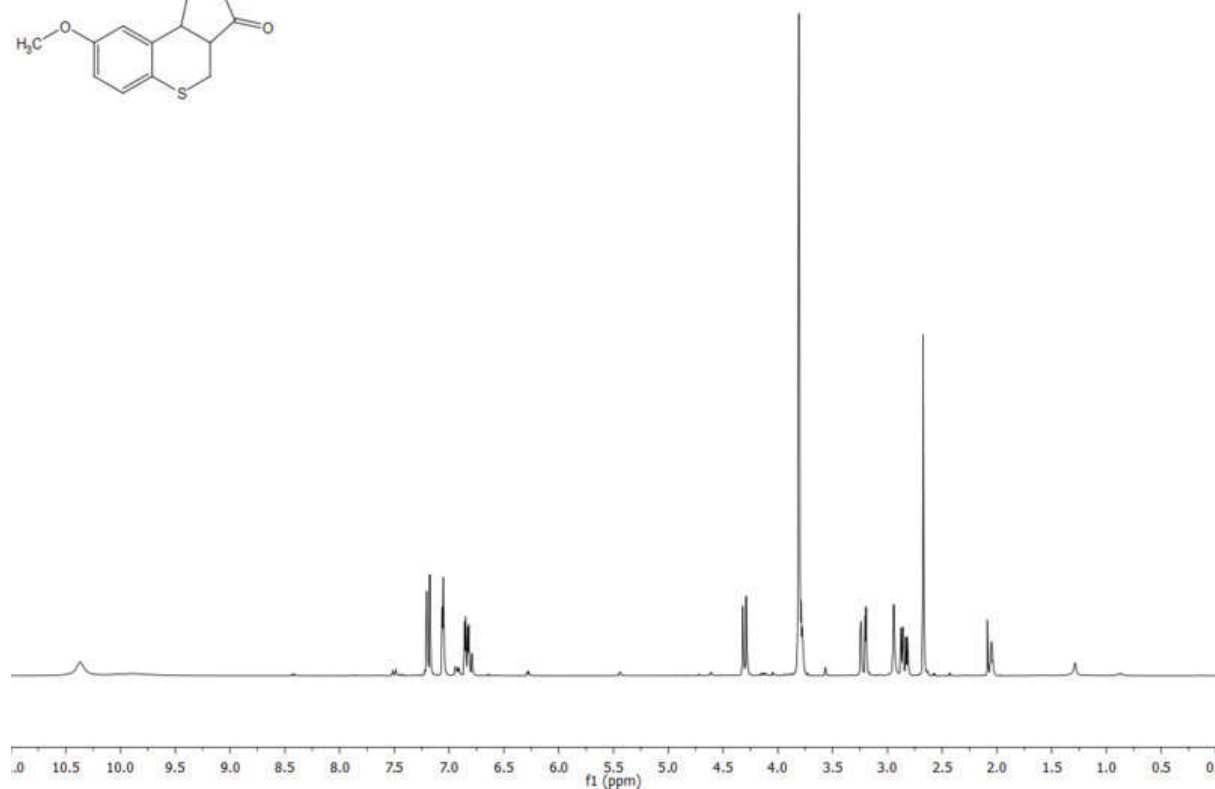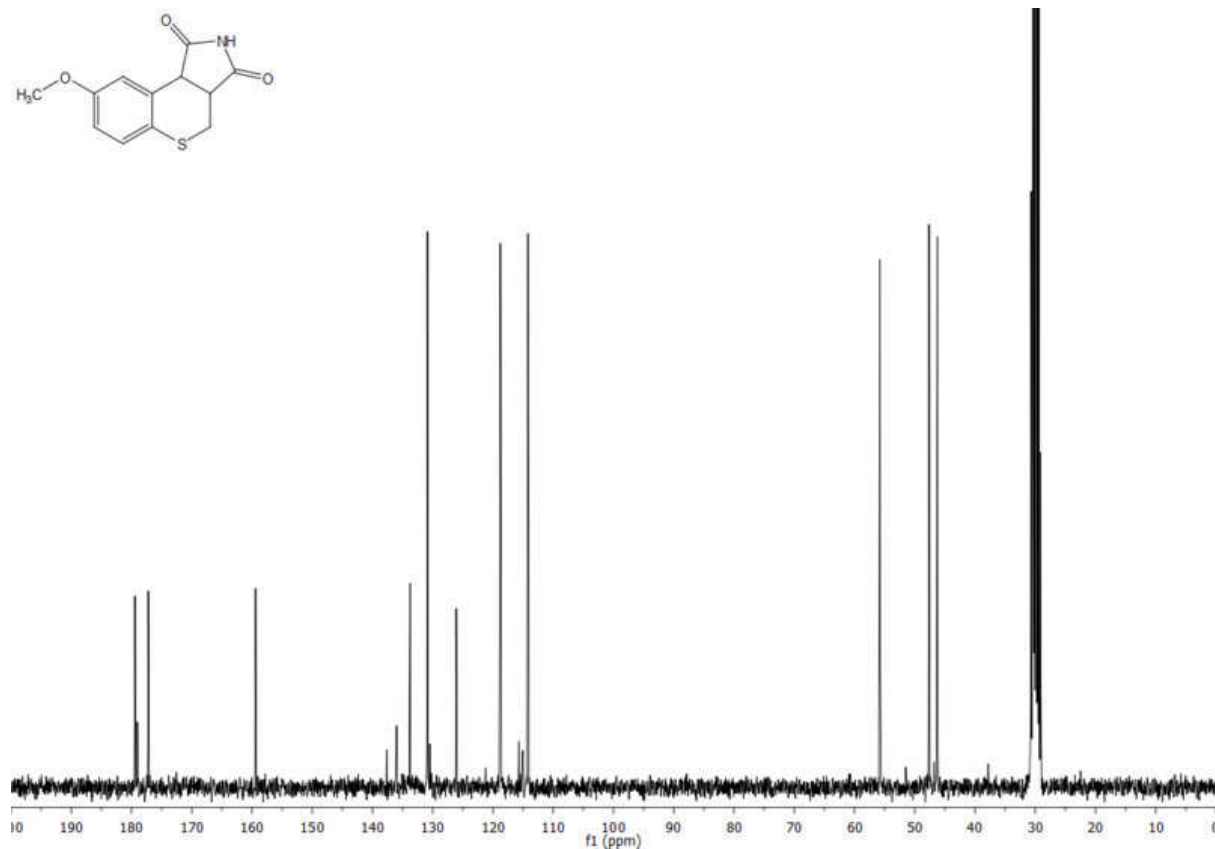

8-(methylthio)-3a,4-dihydrochromeno[3,4-c]pyrrole-1,3(2H,9bH)-dione 5k

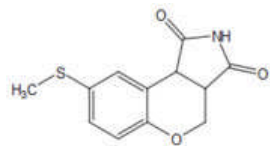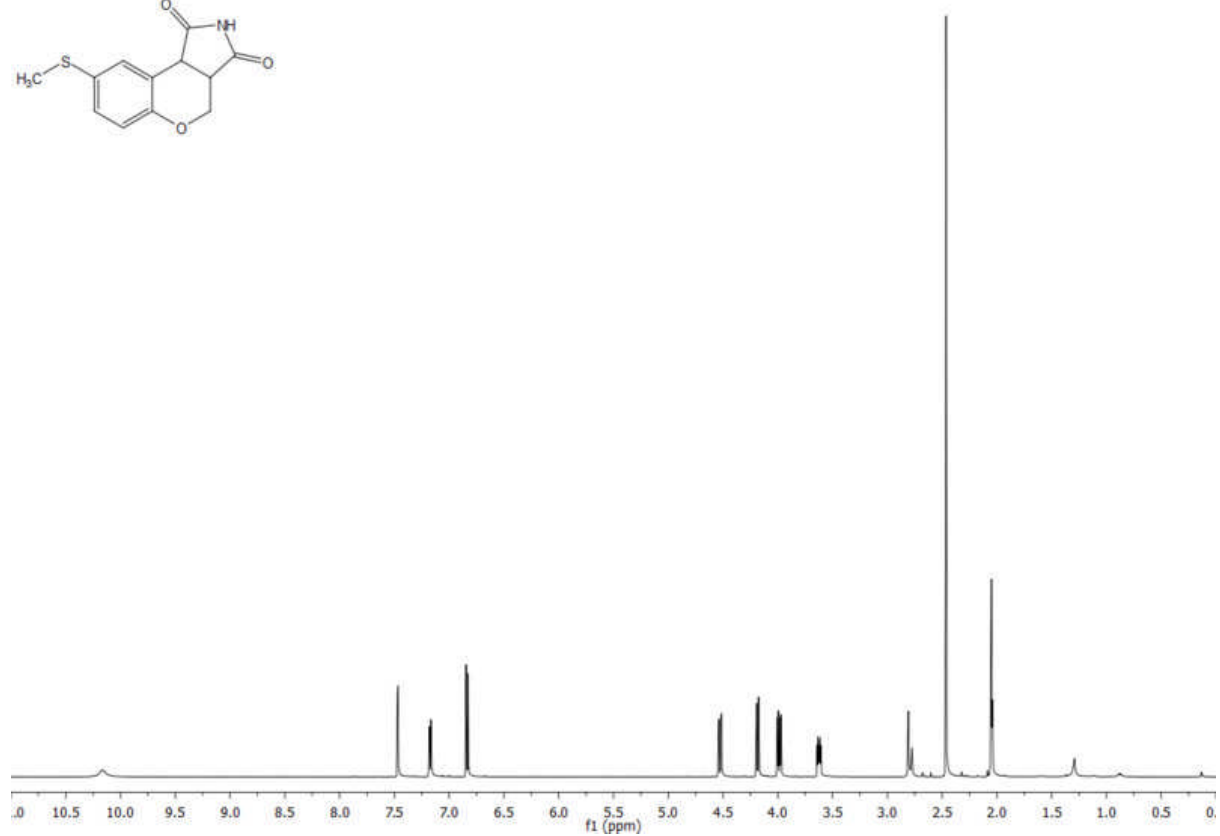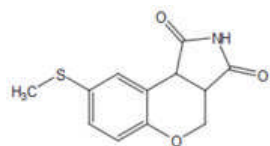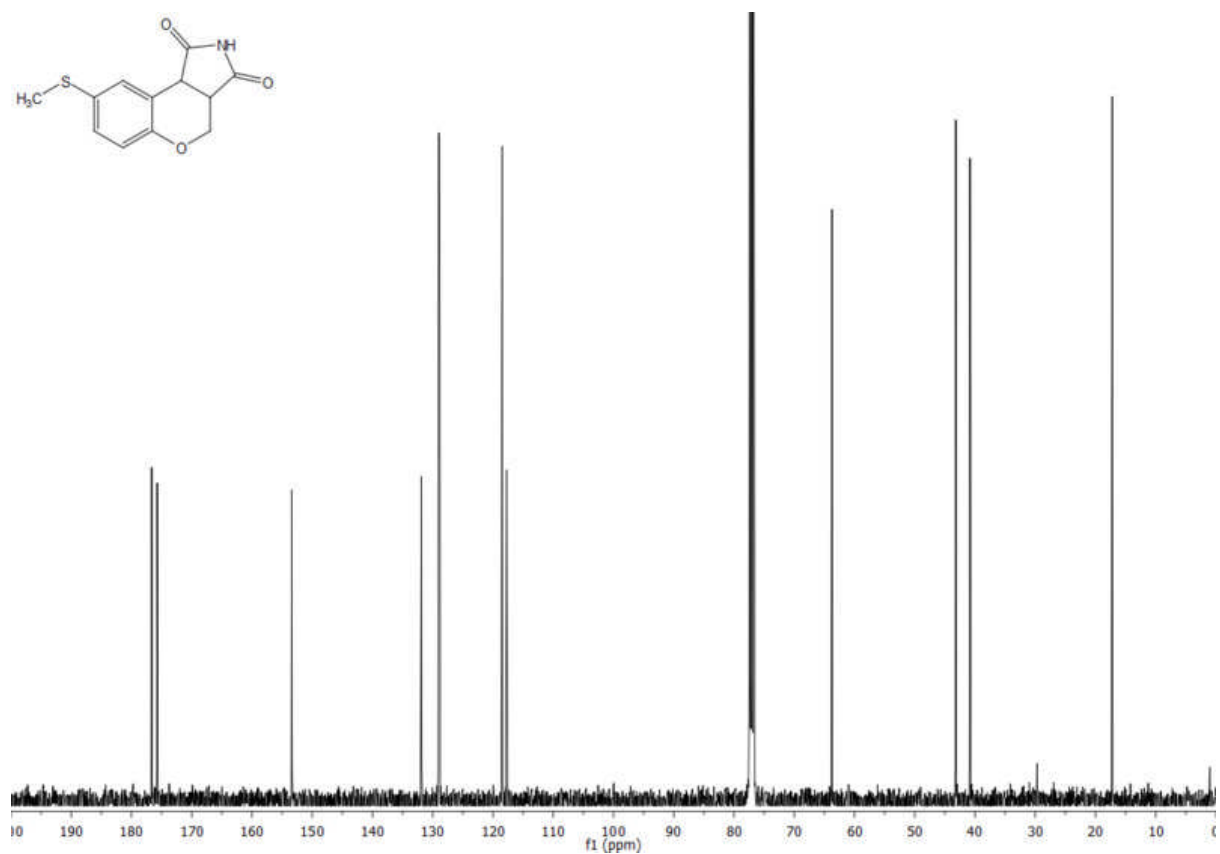

**(3*aR*,9*bS*)-3*a*,4,5,9*b*-tetrahydro-1*H*-pyrrolo[3,4-*c*]quinoline-1,3(2*H*)-dione 4i**

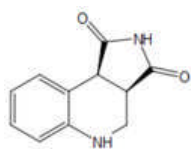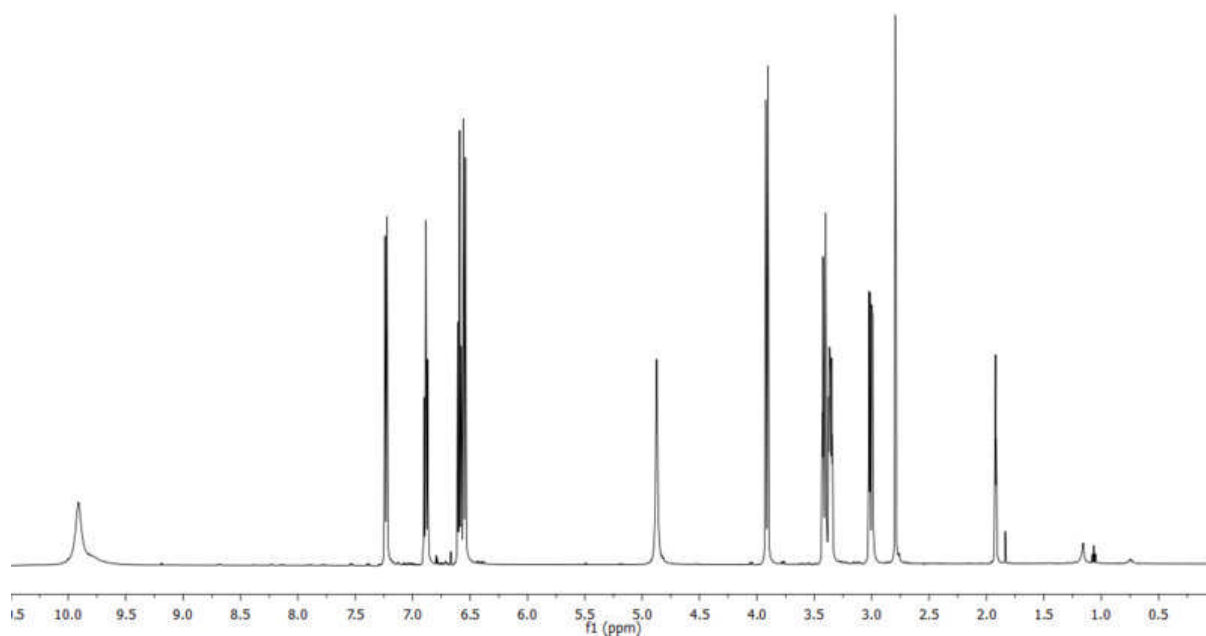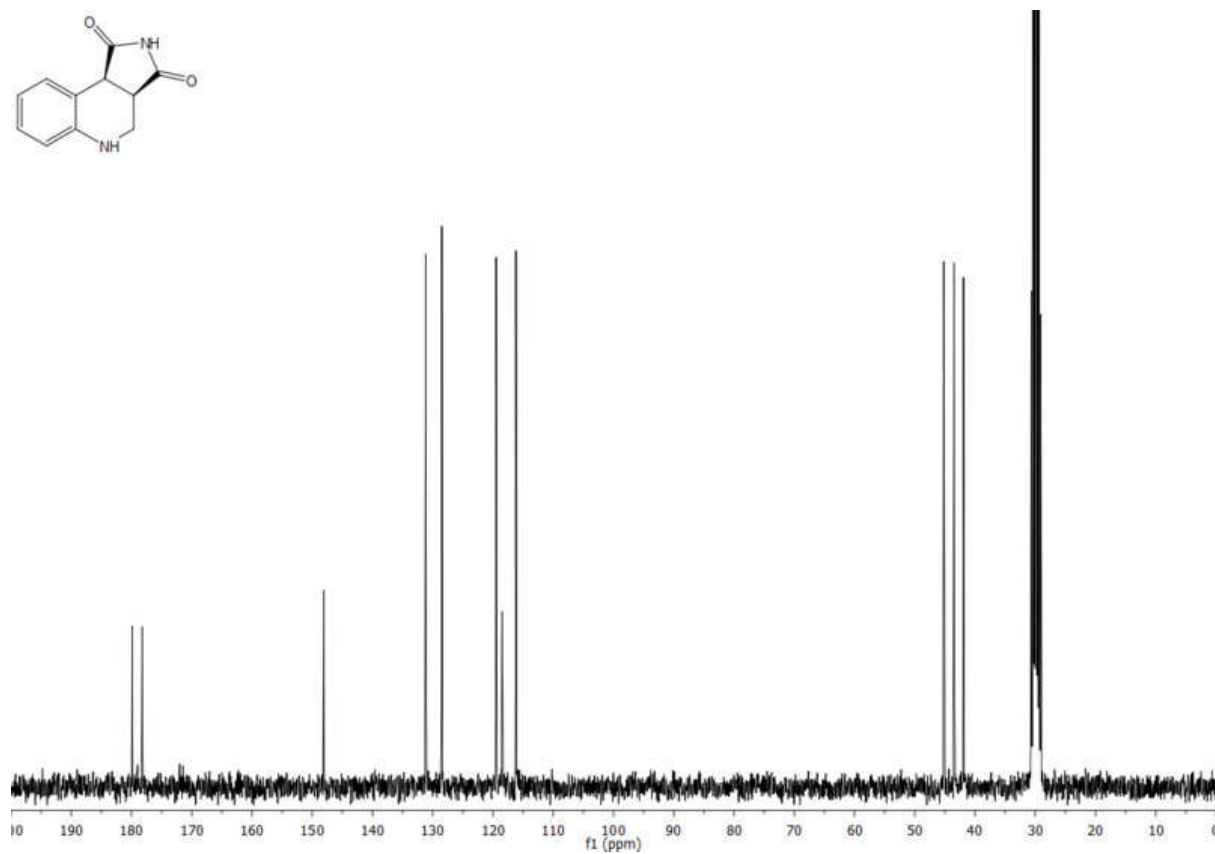

# Benzyl (4-methoxyphenoxy)acetate 15

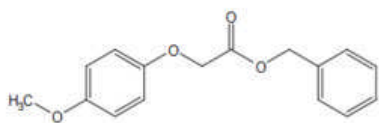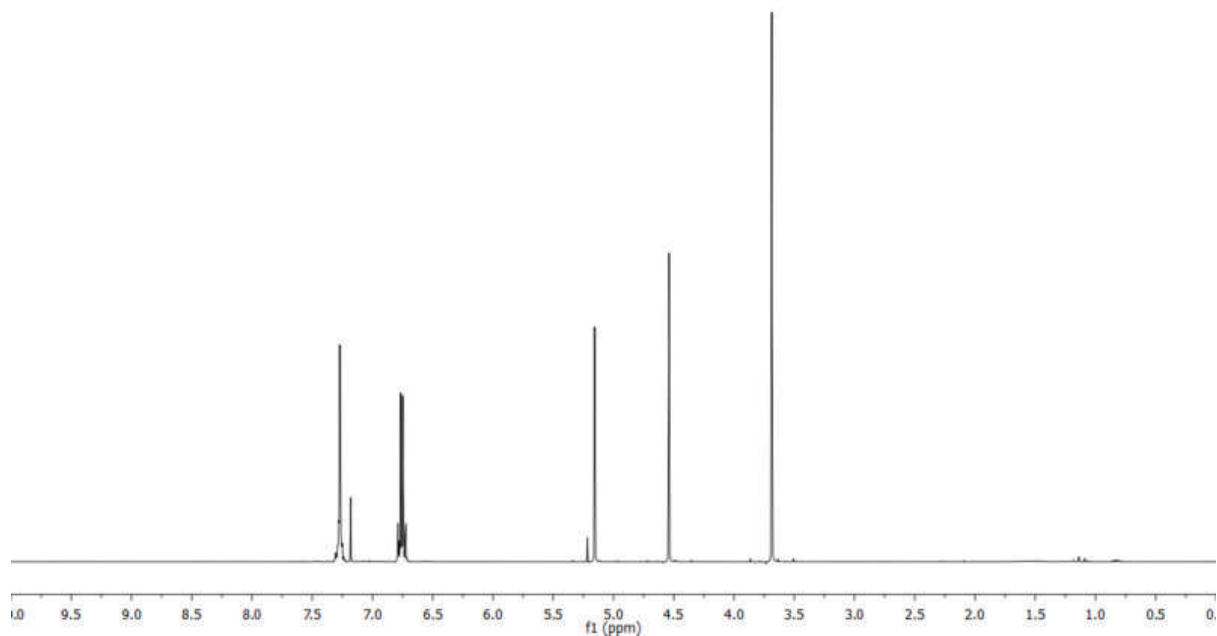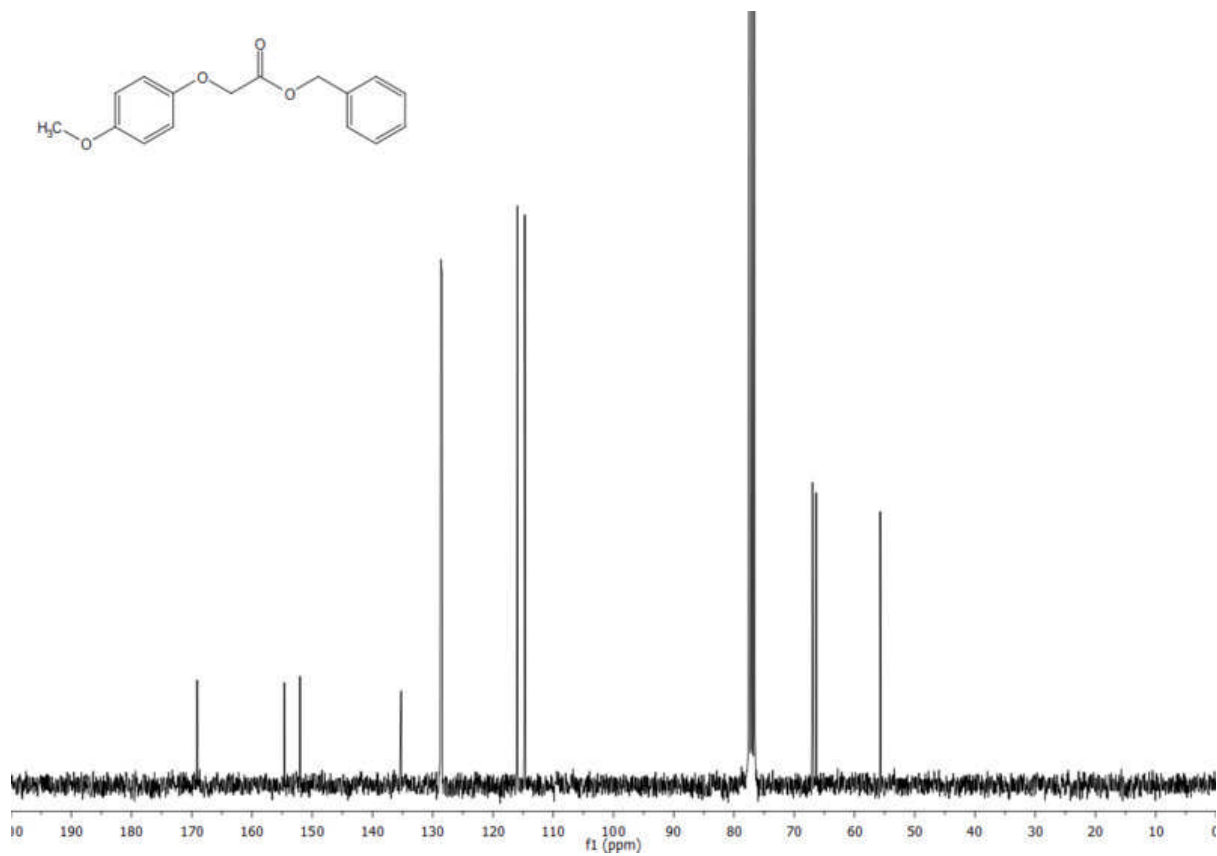

# Dibenzyl 2,2'-(1,4-phenylenebis(oxy))diacetate 18

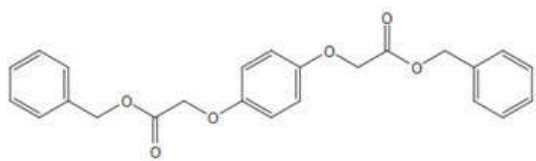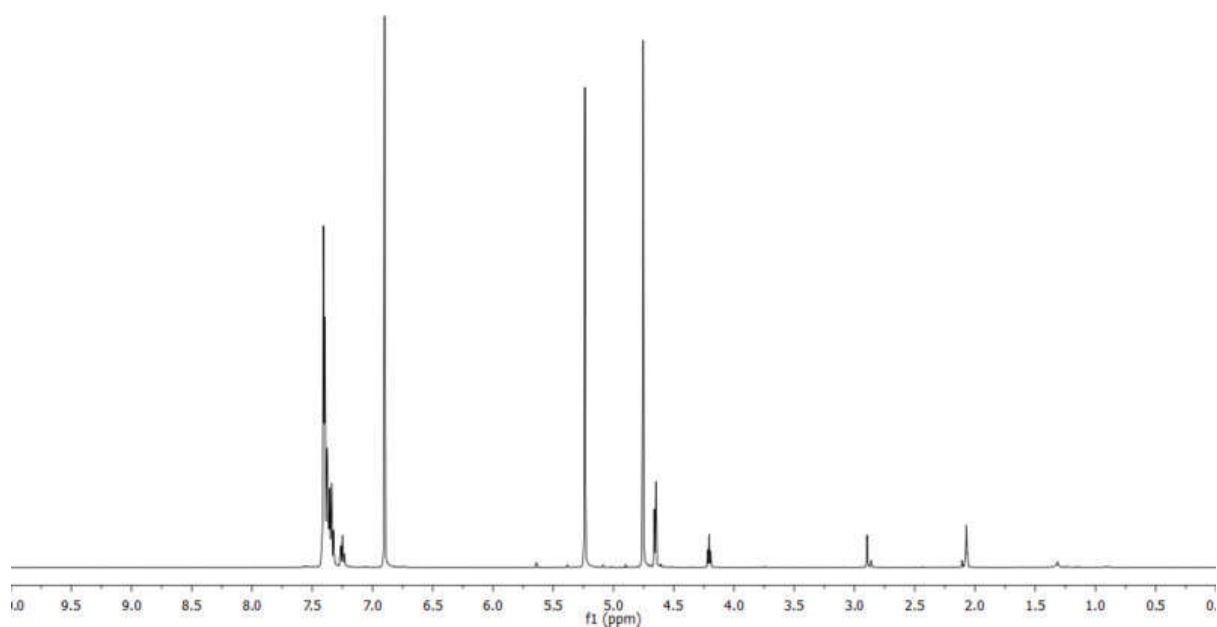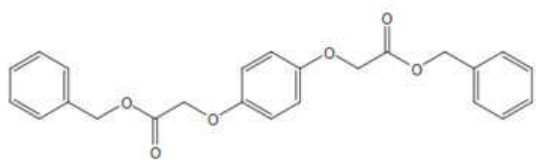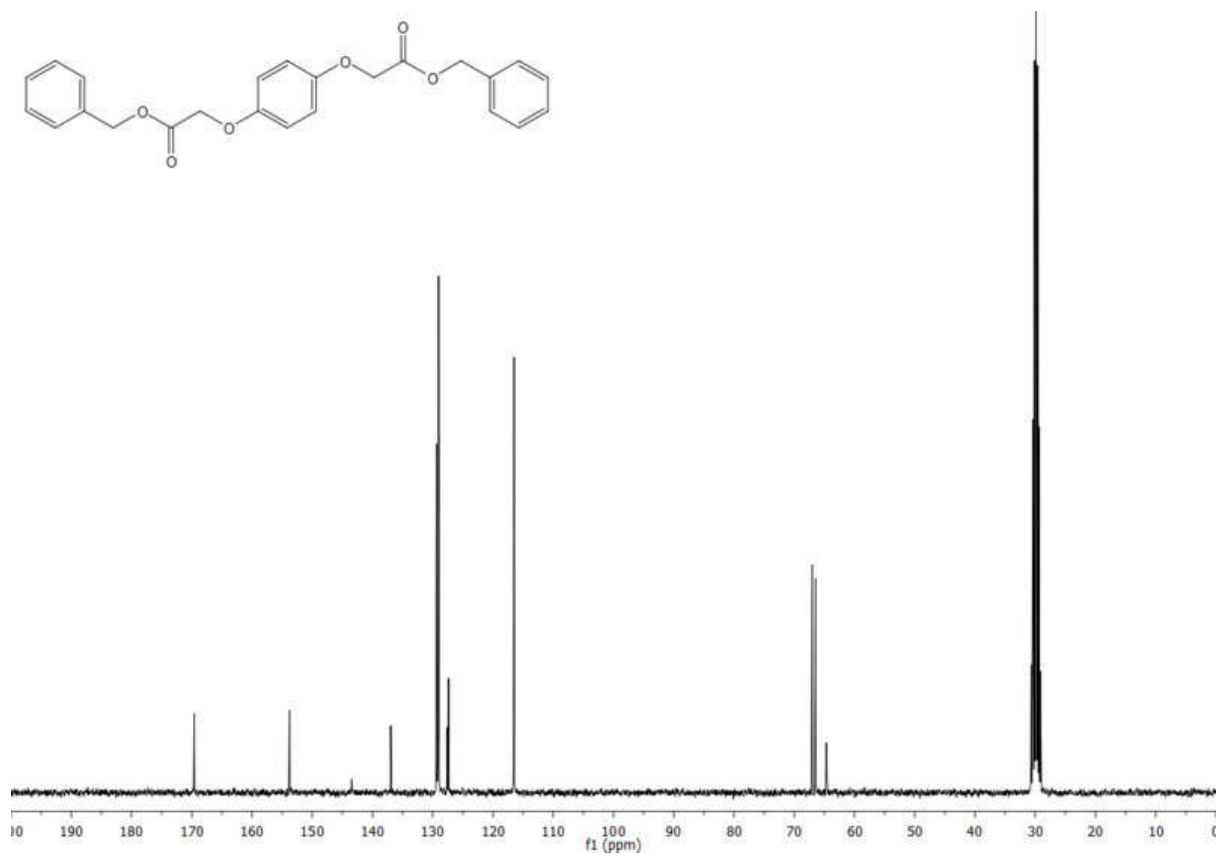

Supplement: chem0020-5492-sd1.pdf [file chem0020-5492-sd1.pdf]
